# Supplementary material
Source: publisher figshare collection journal article supplement (https://gsajournals.figshare.com/ndownloader/files/20187336)
Supplement: Supplementary file 1 [file 20187336]

## Sheet: Overview
	Total	Up-regulated	Down-regulated	In Koncz list
smfa-1	5058	3121	1937	101
smfb-1	2392	1093	1299	7
Share_a:b	827	414	413	4

## Sheet: smfa
Gene ID	logFC	logCPM	PValue	FDR	Direction of change	In Koncz list?	description	comp_description	IPR_domain	has SNP/indels?	SNPs/indels
AT1G01060	-0.796878	5.34001	4.57133e-08	2.04471e-06	DOWN		Homeodomain-like superfamily protein	LATE ELONGATED HYPOCOTYL (LHY); CONTAINS InterPro DOMAIN/s: SANT, DNA-binding (InterPro:IPR001005), Homeodomain-like (InterPro:IPR009057), Myb, DNA-binding (InterPro:IPR014778), HTH transcriptional regulator, Myb-type, DNA-binding (InterPro:IPR017930), Myb-like DNA-binding domain, SHAQKYF class (InterPro:IPR006447); CONTAINS InterPro DOMAIN/s: SANT, DNA-binding (InterPro:IPR001005), Myb, DNA-bind…	Homeodomain-like | Myb domain | Myb domain, plants | SANT/Myb domain	NO
AT1G01070	-0.670628	2.33416	0.00227814	0.0187742	DOWN		nodulin MtN21 /EamA-like transporter family protein	nodulin MtN21 /EamA-like transporter family protein; LOCATED IN: membrane; EXPRESSED IN: 17 plant structures; EXPRESSED DURING: 7 growth stages; CONTAINS InterPro DOMAIN/s: Protein of unknown function DUF6, transmembrane (InterPro:IPR000620); BEST Arabidopsis thaliana protein match is: nodulin MtN21 /EamA-like transporter family protein (TAIR:AT1G11450.2); BEST Arabidopsis thaliana protein match …	Drug/metabolite transporter	NO
AT1G01100	0.461323	7.30273	3.07046e-06	7.71707e-05	UP		60S acidic ribosomal protein family	60S acidic ribosomal protein family; FUNCTIONS IN: structural constituent of ribosome; INVOLVED IN: translational elongation; LOCATED IN: cytosol, cytosolic ribosome, ribosome, nucleus, plasma membrane; EXPRESSED IN: 25 plant structures; EXPRESSED DURING: 14 growth stages; CONTAINS InterPro DOMAIN/s: Ribosomal protein 60S (InterPro:IPR001813); BEST Arabidopsis thaliana protein match is: 60S acidi…	Ribosomal protein L10/L12 | Ribosomal protein L12 family	NO
AT1G01170	-0.298116	6.19332	0.00381224	0.0283757	DOWN		Protein of unknown function (DUF1138)	Protein of unknown function (DUF1138); FUNCTIONS IN: molecular_function unknown; INVOLVED IN: response to stress; LOCATED IN: membrane; LOCATED IN: mitochondrion, membrane; EXPRESSED IN: 23 plant structures; EXPRESSED DURING: 13 growth stages; CONTAINS InterPro DOMAIN/s: Protein of unknown function DUF1138 (InterPro:IPR009515); BEST Arabidopsis thaliana protein match is: Protein of unknown functi…	Protein of unknown function DUF1138	NO
AT1G01190	-0.79829	2.28682	0.000288068	0.00350268	DOWN		cytochrome P450, family 78, subfamily A, polypeptide 8	cytochrome P450, family 78, subfamily A, polypeptide 8 (CYP78A8); FUNCTIONS IN: electron carrier activity, monooxygenase activity, iron ion binding, oxygen binding, heme binding; INVOLVED IN: oxidation reduction; LOCATED IN: endomembrane system; EXPRESSED IN: 6 plant structures; EXPRESSED DURING: LP.10 ten leaves visible, LP.02 two leaves visible, LP.12 twelve leaves visible; CONTAINS InterPro DO…	Cytochrome P450 | Cytochrome P450, E-class, group I | Cytochrome P450, conserved site	NO
AT1G01210	0.493131	2.66066	0.00350737	0.0265286	UP		DNA-directed RNA polymerase, subunit M, archaeal	DNA-directed RNA polymerase, subunit M, archaeal; FUNCTIONS IN: in 6 functions; INVOLVED IN: RNA elongation, regulation of transcription, DNA-dependent, transcription, regulation of transcription; LOCATED IN: nucleus; CONTAINS InterPro DOMAIN/s: Zinc finger, TFIIS-type (InterPro:IPR001222), DNA-directed RNA polymerase, M/15kDa subunit (InterPro:IPR001529), DNA-directed RNA polymerase, subunit M, …	DNA-directed RNA polymerase M, 15kDa subunit, conserved site | DNA-directed RNA polymerase, M/15kDa subunit | DNA-directed RNA polymerase, subunit C11/M/9 | Transcription factor S/DNA-directed RNA polymerase subunit M | Zinc finger, TFIIS-type	NO
AT1G01220	0.382895	4.83601	0.000210398	0.00267311	UP		L-fucokinase/GDP-L-fucose pyrophosphorylase	L-fucokinase/GDP-L-fucose pyrophosphorylase (FKGP); FUNCTIONS IN: fucose-1-phosphate guanylyltransferase activity, fucokinase activity, ATP binding, galactokinase activity; INVOLVED IN: GDP-L-fucose salvage; LOCATED IN: cytoplasm; EXPRESSED IN: 22 plant structures; EXPRESSED DURING: 13 growth stages; CONTAINS InterPro DOMAIN/s: Mevalonate/galactokinase (InterPro:IPR006206), Ribosomal protein S5 d…	GHMP kinase N-terminal domain | GHMP kinase, C-terminal domain | L-fucokinase | Mevalonate/galactokinase | Ribosomal protein S5 domain 2-type fold | Ribosomal protein S5 domain 2-type fold, subgroup	NO
AT1G01300	0.692291	4.7732	5.64984e-07	1.82973e-05	UP		Eukaryotic aspartyl protease family protein	Eukaryotic aspartyl protease family protein; FUNCTIONS IN: aspartic-type endopeptidase activity; INVOLVED IN: proteolysis, response to karrikin; LOCATED IN: membrane, plant-type cell wall; EXPRESSED IN: 22 plant structures; EXPRESSED DURING: 13 growth stages; CONTAINS InterPro DOMAIN/s: Peptidase aspartic (InterPro:IPR021109), Peptidase aspartic, catalytic (InterPro:IPR009007), Peptidase A1 (Inte…	Aspartic peptidase | Aspartic peptidase domain	NO
AT1G01370	0.620278	1.35144	0.0056874	0.0388476	UP		Histone superfamily protein	HTR12; FUNCTIONS IN: DNA binding; INVOLVED IN: double fertilization forming a zygote and endosperm; LOCATED IN: chromosome, centromeric region, nucleus; EXPRESSED IN: 17 plant structures; EXPRESSED DURING: 8 growth stages; CONTAINS InterPro DOMAIN/s: Histone H3 (InterPro:IPR000164), Histone-fold (InterPro:IPR009072), Histone core (InterPro:IPR007125); BEST Arabidopsis thaliana protein match is: m…	Histone H3/CENP-A | Histone core | Histone-fold	NO
AT1G01510	0.366059	5.38241	0.000150961	0.0020338	UP		NAD(P)-binding Rossmann-fold superfamily protein	ANGUSTIFOLIA (AN); CONTAINS InterPro DOMAIN/s: D-isomer specific 2-hydroxyacid dehydrogenase, NAD-binding (InterPro:IPR006140), NAD(P)-binding domain (InterPro:IPR016040); BEST Arabidopsis thaliana protein match is: D-isomer specific 2-hydroxyacid dehydrogenase family protein (TAIR:AT1G12550.1)	D-isomer specific 2-hydroxyacid dehydrogenase, NAD-binding domain | NAD(P)-binding domain	NO
AT1G01620	0.392422	9.18869	0.000449038	0.00502293	UP		plasma membrane intrinsic protein 1C	plasma membrane intrinsic protein 1C (PIP1C); FUNCTIONS IN: water channel activity; INVOLVED IN: response to water deprivation, response to salt stress, transport, water transport; LOCATED IN: plasma membrane, chloroplast, membrane; LOCATED IN: plasma membrane, membrane; EXPRESSED IN: 22 plant structures; EXPRESSED DURING: 14 growth stages; CONTAINS InterPro DOMAIN/s: Major intrinsic protein, con…	Aquaporin-like | Major intrinsic protein | Major intrinsic protein, conserved site	NO
AT1G01670	-1.87991	-0.0451568	4.66677e-09	2.7194e-07	DOWN		RING/U-box superfamily protein	RING/U-box superfamily protein; FUNCTIONS IN: ubiquitin-protein ligase activity; INVOLVED IN: protein ubiquitination; LOCATED IN: ubiquitin ligase complex; EXPRESSED IN: 12 plant structures; EXPRESSED DURING: 7 growth stages; CONTAINS InterPro DOMAIN/s: U box domain (InterPro:IPR003613); BEST Arabidopsis thaliana protein match is: RING/U-box superfamily protein (TAIR:AT3G61390.2)	Rossmann-like alpha/beta/alpha sandwich fold | U box domain | Zinc finger, RING/FYVE/PHD-type	NO
AT1G01690	0.628147	2.43786	0.000129898	0.0017997	UP		putative recombination initiation defects 3	putative recombination initiation defects 3 (PRD3)		NO
AT1G01695	-3.43423	-2.20033	0.000126614	0.00176379	DOWN		Phosphatidylinositol N-acetyglucosaminlytransferase subunit P-related	Phosphatidylinositol N-acetyglucosaminlytransferase subunit P-related; FUNCTIONS IN: molecular_function unknown; INVOLVED IN: biological_process unknown; LOCATED IN: cellular_component unknown; BEST Arabidopsis thaliana protein match is: Protein of unknown function (DUF3741) (TAIR:AT4G00440.1)	Domain of unknown function DUF4378	NO
AT1G01730	0.309223	4.32075	0.00568967	0.0388552	UP			unknown protein; FUNCTIONS IN: molecular_function unknown; INVOLVED IN: biological_process unknown; LOCATED IN: chloroplast; EXPRESSED IN: 23 plant structures; EXPRESSED DURING: 13 growth stages		NO
AT1G01740	-0.516889	2.1814	0.00182342	0.015647	DOWN		Protein kinase protein with tetratricopeptide repeat domain	Protein kinase protein with tetratricopeptide repeat domain; FUNCTIONS IN: protein serine/threonine kinase activity, binding, protein kinase activity, kinase activity, ATP binding; INVOLVED IN: protein amino acid phosphorylation; INVOLVED IN: protein amino acid phosphorylation, N-terminal protein myristoylation; EXPRESSED IN: 22 plant structures; LOCATED IN: plasma membrane; EXPRESSED DURING: 13 …	Protein kinase domain | Protein kinase-like domain | Serine-threonine/tyrosine-protein kinase catalytic domain | Tetratricopeptide-like helical domain	NO
AT1G01770	1.016	5.78412	2.15197e-16	4.90005e-14	UP			unknown protein; CONTAINS InterPro DOMAIN/s: Protein of unknown function DUF1446 (InterPro:IPR010839)	Protein of unknown function DUF1446	NO
AT1G01790	-0.647515	7.13601	1.73877e-09	1.14159e-07	DOWN		K+ efflux antiporter 1	K+ efflux antiporter 1 (KEA1); FUNCTIONS IN: potassium:hydrogen antiporter activity, potassium ion transmembrane transporter activity; INVOLVED IN: potassium ion transport, cation transport, metabolic process, transmembrane transport; LOCATED IN: chloroplast, chloroplast envelope; EXPRESSED IN: 23 plant structures; EXPRESSED DURING: 15 growth stages; CONTAINS InterPro DOMAIN/s: K+/H+ exchanger (I…	Cation/H+ exchanger | K+/H+ exchanger | NAD(P)-binding domain | Regulator of K+ conductance, N-terminal	NO
AT1G01860	-0.503275	3.9978	0.000188748	0.00245075	DOWN		Ribosomal RNA adenine dimethylase family protein	PALEFACE 1 (PFC1); FUNCTIONS IN: mRNA (2'-O-methyladenosine-N6-)-methyltransferase activity; INVOLVED IN: response to cold; LOCATED IN: chloroplast; EXPRESSED IN: 22 plant structures; EXPRESSED DURING: 13 growth stages; CONTAINS InterPro DOMAIN/s: Ribosomal RNA adenine methylase transferase, N-terminal (InterPro:IPR020598), Ribosomal RNA adenine methylase transferase, conserved site (InterPro:IPR…	Ribosomal RNA adenine methylase transferase | Ribosomal RNA adenine methylase transferase, N-terminal | Ribosomal RNA adenine methylase transferase, conserved site | S-adenosyl-L-methionine-dependent methyltransferase-like | rRNA adenine dimethylase-like	NO
AT1G01970	-0.38122	4.62503	0.000156007	0.00209509	DOWN		Tetratricopeptide repeat (TPR)-like superfamily protein	Tetratricopeptide repeat (TPR)-like superfamily protein; CONTAINS InterPro DOMAIN/s: Pentatricopeptide repeat (InterPro:IPR002885); BEST Arabidopsis thaliana protein match is: pentatricopeptide (PPR) repeat-containing protein (TAIR:AT1G19520.1)	Pentatricopeptide repeat	NO
AT1G02020	0.531526	4.71946	9.20774e-07	2.729e-05	UP		nitroreductase family protein	nitroreductase family protein; FUNCTIONS IN: oxidoreductase activity, acting on NADH or NADPH, nitrogenous group as acceptor, oxidoreductase activity; INVOLVED IN: metabolic process; LOCATED IN: chloroplast; EXPRESSED IN: 23 plant structures; EXPRESSED DURING: 13 growth stages; CONTAINS InterPro DOMAIN/s: Nitroreductase-like (InterPro:IPR000415)	Nitroreductase | Nitroreductase-like	NO
AT1G02110	0.357921	4.69848	0.00565302	0.0386786	UP		Protein of unknown function (DUF630 and DUF632)	Protein of unknown function (DUF630 and DUF632); FUNCTIONS IN: molecular_function unknown; INVOLVED IN: N-terminal protein myristoylation; LOCATED IN: plasma membrane; EXPRESSED IN: 22 plant structures; EXPRESSED DURING: 14 growth stages; CONTAINS InterPro DOMAIN/s: Protein of unknown function DUF630 (InterPro:IPR006868), Protein of unknown function DUF632 (InterPro:IPR006867); BEST Arabidopsis t…	Domain of unknown function DUF630 | Domain of unknown function DUF632	NO
AT1G02140	0.309999	6.26629	0.000922914	0.00905995	UP	YES	mago nashi family protein	MAGO NASHI (MAGO); FUNCTIONS IN: protein binding; INVOLVED IN: pollen tube guidance, sex determination, embryo development ending in seed dormancy; LOCATED IN: in 6 components; EXPRESSED IN: 25 plant structures; EXPRESSED DURING: 15 growth stages; CONTAINS InterPro DOMAIN/s: Mago nashi protein (InterPro:IPR004023)	Mago nashi protein	NO
AT1G02145	0.561028	4.92511	8.09281e-07	2.46897e-05	UP		homolog of asparagine-linked glycosylation 12	homolog of asparagine-linked glycosylation 12 (ALG12); FUNCTIONS IN: alpha-1,6-mannosyltransferase activity; INVOLVED IN: ER-associated protein catabolic process, protein amino acid terminal N-glycosylation; LOCATED IN: endomembrane system, intrinsic to endoplasmic reticulum membrane; LOCATED IN: intrinsic to endoplasmic reticulum membrane; CONTAINS InterPro DOMAIN/s: Alg9-like mannosyltransferas…	GPI mannosyltransferase	NO
AT1G02280	0.510537	6.193	6.49713e-06	0.000144824	UP		translocon at the outer envelope membrane of chloroplasts 33	translocon at the outer envelope membrane of chloroplasts 33 (TOC33); FUNCTIONS IN: protein binding, GTP binding, GTPase activity, protein homodimerization activity; INVOLVED IN: protein targeting to chloroplast; LOCATED IN: chloroplast outer membrane, chloroplast; LOCATED IN: chloroplast outer membrane, chloroplast, chloroplast envelope; EXPRESSED IN: 23 plant structures; EXPRESSED DURING: 13 gr…	AIG1 | Chloroplast protein import component Toc34 | P-loop containing nucleoside triphosphate hydrolase	NO
AT1G02330	0.390912	4.5338	0.000616965	0.00652023	UP	YES		CONTAINS InterPro DOMAIN/s: Hepatocellular carcinoma-associated antigen 59 (InterPro:IPR010756)	Hepatocellular carcinoma-associated antigen 59	NO
AT1G02370	0.674982	2.13243	0.00031936	0.00381567	UP		Tetratricopeptide repeat (TPR)-like superfamily protein	Tetratricopeptide repeat (TPR)-like superfamily protein; CONTAINS InterPro DOMAIN/s: Pentatricopeptide repeat (InterPro:IPR002885); BEST Arabidopsis thaliana protein match is: Tetratricopeptide repeat (TPR)-like superfamily protein (TAIR:AT4G01990.1)	Pentatricopeptide repeat | Tetratricopeptide-like helical domain	NO
AT1G02470	-1.41708	0.130584	0.00507617	0.0355079	DOWN		Polyketide cyclase/dehydrase and lipid transport superfamily protein	Polyketide cyclase/dehydrase and lipid transport superfamily protein; FUNCTIONS IN: molecular_function unknown; INVOLVED IN: biological_process unknown; LOCATED IN: chloroplast; EXPRESSED IN: 10 plant structures; EXPRESSED DURING: 4 anthesis, C globular stage, petal differentiation and expansion stage; CONTAINS InterPro DOMAIN/s: Streptomyces cyclase/dehydrase (InterPro:IPR005031); BEST Arabidops…	START-like domain | Streptomyces cyclase/dehydrase	NO
AT1G02610	0.902616	4.95049	0.000126276	0.00176258	UP		RING/FYVE/PHD zinc finger superfamily protein	RING/FYVE/PHD zinc finger superfamily protein; FUNCTIONS IN: zinc ion binding; CONTAINS InterPro DOMAIN/s: Protein of unknown function DUF3675 (InterPro:IPR022143), Zinc finger, C3HC4 RING-type (InterPro:IPR018957), Zinc finger, RING-CH-type (InterPro:IPR011016); BEST Arabidopsis thaliana protein match is: RING/FYVE/PHD zinc finger superfamily protein (TAIR:AT4G02075.1)	Protein of unknown function DUF3675 | Zinc finger, RING-CH-type | Zinc finger, RING/FYVE/PHD-type	NO
AT1G02660	1.1336	5.4914	3.13949e-05	0.000554199	UP		alpha/beta-Hydrolases superfamily protein	alpha/beta-Hydrolases superfamily protein; FUNCTIONS IN: triglyceride lipase activity; INVOLVED IN: lipid metabolic process; LOCATED IN: cellular_component unknown; EXPRESSED IN: 24 plant structures; EXPRESSED DURING: 15 growth stages; CONTAINS InterPro DOMAIN/s: Lipase, class 3 (InterPro:IPR002921); BEST Arabidopsis thaliana protein match is: alpha/beta-Hydrolases superfamily protein (TAIR:AT3G6…	Alpha/Beta hydrolase fold | Fungal lipase-like domain	NO
AT1G02690	0.436305	3.21521	0.0041123	0.0300448	UP		importin alpha isoform 6	importin alpha isoform 6 (IMPA-6); FUNCTIONS IN: protein transporter activity, binding; INVOLVED IN: intracellular protein transport, protein import into nucleus; LOCATED IN: nucleus, nuclear pore, cytoplasm; EXPRESSED IN: 20 plant structures; EXPRESSED DURING: 11 growth stages; CONTAINS InterPro DOMAIN/s: Importin-alpha-like, importin-beta-binding domain (InterPro:IPR002652), Armadillo-like heli…	Armadillo | Armadillo-like helical | Armadillo-type fold | Importin subunit alpha | Importin-alpha, importin-beta-binding domain	NO
AT1G02730	0.90404	4.08164	1.0459e-07	4.1738e-06	UP		cellulose synthase-like D5	cellulose synthase-like D5 (CSLD5); CONTAINS InterPro DOMAIN/s: Cellulose synthase (InterPro:IPR005150); BEST Arabidopsis thaliana protein match is: cellulose synthase-like D3 (TAIR:AT3G03050.1)	Cellulose synthase | Nucleotide-diphospho-sugar transferases | Zinc finger, RING/FYVE/PHD-type	NO
AT1G02770	-1.91361	0.170581	1.06741e-08	5.57388e-07	DOWN		Protein of unknown function (DUF626)	Protein of unknown function (DUF626); CONTAINS InterPro DOMAIN/s: Protein of unknown function DUF626, Arabidopsis thaliana (InterPro:IPR006462); BEST Arabidopsis thaliana protein match is: Protein of unknown function (DUF626) (TAIR:AT1G19060.1)	Protein of unknown function DUF626, Arabidopsis thaliana	NO
AT1G02780	0.315737	8.83855	0.00111766	0.0105987	UP		Ribosomal protein L19e family protein	embryo defective 2386 (emb2386); FUNCTIONS IN: structural constituent of ribosome; INVOLVED IN: translation, ribosome biogenesis, embryo development ending in seed dormancy; LOCATED IN: in 6 components; EXPRESSED IN: 25 plant structures; EXPRESSED DURING: 14 growth stages; CONTAINS InterPro DOMAIN/s: Ribosomal protein L19/L19e (InterPro:IPR000196), Ribosomal protein L19/L19e, domain 3 (InterPro:I…	Ribosomal protein L19/L19e | Ribosomal protein L19/L19e conserved site | Ribosomal protein L19/L19e domain | Ribosomal protein L19/L19e, domain 1 | Ribosomal protein L19/L19e, domain 3	NO
AT1G02810	-0.617886	2.14512	0.00701976	0.0457848	DOWN		Plant invertase/pectin methylesterase inhibitor superfamily	Plant invertase/pectin methylesterase inhibitor superfamily; FUNCTIONS IN: enzyme inhibitor activity, pectinesterase activity; INVOLVED IN: cell wall modification; LOCATED IN: endomembrane system, cell wall, plant-type cell wall; EXPRESSED IN: 14 plant structures; EXPRESSED DURING: 6 growth stages; CONTAINS InterPro DOMAIN/s: Pectinesterase, active site (InterPro:IPR018040), Pectin lyase fold/vir…	Pectin lyase fold | Pectin lyase fold/virulence factor | Pectinesterase inhibitor domain | Pectinesterase, active site | Pectinesterase, catalytic	NO
AT1G02820	-1.09488	4.56754	5.58588e-07	1.8125e-05	DOWN		Late embryogenesis abundant 3 (LEA3) family protein	Late embryogenesis abundant 3 (LEA3) family protein; FUNCTIONS IN: molecular_function unknown; INVOLVED IN: embryo development, response to stress; EXPRESSED IN: 16 plant structures; EXPRESSED DURING: 8 growth stages; CONTAINS InterPro DOMAIN/s: Late embryogenesis abundant protein, group 3 (InterPro:IPR004926); BEST Arabidopsis thaliana protein match is: senescence-associated gene 21 (TAIR:AT4G02…	Late embryogenesis abundant protein, LEA-5	NO
AT1G02850	-0.655394	6.34114	0.000192626	0.00249426	DOWN		beta glucosidase 11	beta glucosidase 11 (BGLU11); FUNCTIONS IN: cation binding, hydrolase activity, hydrolyzing O-glycosyl compounds, catalytic activity; INVOLVED IN: carbohydrate metabolic process; LOCATED IN: endomembrane system; EXPRESSED IN: 24 plant structures; EXPRESSED DURING: 13 growth stages; CONTAINS InterPro DOMAIN/s: Glycoside hydrolase, family 1 (InterPro:IPR001360), Glycoside hydrolase, family 1, activ…	Glycoside hydrolase, catalytic domain | Glycoside hydrolase, family 1 | Glycoside hydrolase, family 1, active site | Glycoside hydrolase, superfamily	NO
AT1G02870	0.605241	3.67274	1.22623e-05	0.000250004	UP			FUNCTIONS IN: molecular_function unknown; INVOLVED IN: biological_process unknown; EXPRESSED IN: 23 plant structures; EXPRESSED DURING: 13 growth stages; CONTAINS InterPro DOMAIN/s: Ribosome biogenesis protein Nop16 (InterPro:IPR019002)	Ribosome biogenesis protein Nop16	NO
AT1G03055	-1.07466	2.72523	3.76827e-08	1.7082e-06	DOWN			unknown protein; BEST Arabidopsis thaliana protein match is: unknown protein (TAIR:AT1G64680.1)	Domain of unknown function DUF4033	NO
AT1G03100	0.682238	1.81024	0.000386317	0.00444475	UP		Pentatricopeptide repeat (PPR) superfamily protein	Pentatricopeptide repeat (PPR) superfamily protein; CONTAINS InterPro DOMAIN/s: Pentatricopeptide repeat (InterPro:IPR002885); BEST Arabidopsis thaliana protein match is: Pentatricopeptide repeat (PPR) superfamily protein (TAIR:AT4G17616.1)	Pentatricopeptide repeat | Tetratricopeptide-like helical domain	NO
AT1G03106	-1.95066	-1.96836	0.00143261	0.0129361	DOWN			unknown protein		NO
AT1G03110	0.556535	2.98115	0.003882	0.0287365	UP		Transducin/WD40 repeat-like superfamily protein	Transducin/WD40 repeat-like superfamily protein; CONTAINS InterPro DOMAIN/s: WD40 repeat 2 (InterPro:IPR019782), WD40 repeat-like-containing domain (InterPro:IPR011046), WD40 repeat, conserved site (InterPro:IPR019775), WD40-repeat-containing domain (InterPro:IPR017986), WD40/YVTN repeat-like-containing domain (InterPro:IPR015943), WD40 repeat (InterPro:IPR001680), WD40 repeat, subgroup (InterPro…	WD40 repeat | WD40 repeat, conserved site | WD40-repeat-containing domain | WD40/YVTN repeat-like-containing domain | tRNA (guanine-N(7)-)-methyltransferase non-catalytic subunit, Trm82	NO
AT1G03140	0.321545	5.7265	0.00118364	0.0110725	UP	YES	splicing factor Prp18 family protein	splicing factor Prp18 family protein; INVOLVED IN: RNA splicing; LOCATED IN: spliceosomal complex; EXPRESSED IN: male gametophyte, cultured cell, pollen tube; EXPRESSED DURING: L mature pollen stage, M germinated pollen stage; CONTAINS InterPro DOMAIN/s: Pre-mRNA processing factor 4 (PRP4) like (InterPro:IPR014906), Splicing factor motif (InterPro:IPR003648), Prp18 (InterPro:IPR004098); BEST Arab…	Pre-mRNA processing factor 4 (PRP4)-like | Prp18 | Splicing factor motif	NO
AT1G03160	-0.314357	5.82056	0.0010185	0.00981802	DOWN		FZO-like	FZO-like (FZL); FUNCTIONS IN: thiamin-phosphate diphosphorylase activity, GTP binding; FUNCTIONS IN: thiamin-phosphate diphosphorylase activity, GTP binding, GTPase activity; INVOLVED IN: vegetative to reproductive phase transition of meristem, thylakoid membrane organization; LOCATED IN: chloroplast membrane, chloroplast; EXPRESSED IN: 23 plant structures; EXPRESSED DURING: 13 growth stages; CON…	Aldolase-type TIM barrel | GTP binding domain | P-loop containing nucleoside triphosphate hydrolase | Thiamin phosphate synthase superfamily | Thiamine phosphate synthase	NO
AT1G03180	0.722169	1.65295	0.000477942	0.00528309	UP			unknown protein; FUNCTIONS IN: molecular_function unknown; INVOLVED IN: biological_process unknown; LOCATED IN: mitochondrion; EXPRESSED IN: 15 plant structures; EXPRESSED DURING: 8 growth stages		NO
AT1G03200	-0.508365	2.42269	0.00344662	0.0261914	DOWN			unknown protein; BEST Arabidopsis thaliana protein match is: unknown protein (TAIR:AT1G03240.1)		NO
AT1G03230	0.5764	4.52966	6.68658e-07	2.10674e-05	UP		Eukaryotic aspartyl protease family protein	Eukaryotic aspartyl protease family protein; FUNCTIONS IN: aspartic-type endopeptidase activity; INVOLVED IN: response to salt stress; LOCATED IN: cell wall, plant-type cell wall; EXPRESSED IN: stem, root; CONTAINS InterPro DOMAIN/s: Peptidase aspartic (InterPro:IPR021109), Peptidase aspartic, catalytic (InterPro:IPR009007), Peptidase A1 (InterPro:IPR001461); BEST Arabidopsis thaliana protein mat…	Aspartic peptidase | Aspartic peptidase domain	NO
AT1G03360	0.798144	2.70354	7.32709e-07	2.2766e-05	UP		ribosomal RNA processing 4	ribosomal RNA processing 4 (RRP4); FUNCTIONS IN: exonuclease activity; LOCATED IN: mitochondrion; EXPRESSED IN: 20 plant structures; EXPRESSED DURING: 13 growth stages; CONTAINS InterPro DOMAIN/s: Nucleic acid-binding, OB-fold-like (InterPro:IPR016027)	Exosome complex RNA-binding protein 1/RRP40/RRP4 | K Homology domain, type 1 | Nucleic acid-binding, OB-fold | RNA-binding domain, S1	NO
AT1G03400	-0.744109	4.58646	3.69369e-10	2.7045e-08	DOWN		2-oxoglutarate (2OG) and Fe(II)-dependent oxygenase superfamily protein	2-oxoglutarate (2OG) and Fe(II)-dependent oxygenase superfamily protein; CONTAINS InterPro DOMAIN/s: Oxoglutarate/iron-dependent oxygenase (InterPro:IPR005123); BEST Arabidopsis thaliana protein match is: 2-oxoglutarate (2OG) and Fe(II)-dependent oxygenase superfamily protein (TAIR:AT1G03410.1)	Isopenicillin N synthase-like | Non-haem dioxygenase N-terminal domain | Oxoglutarate/iron-dependent dioxygenase	YES	1:844179:G-GT;exonic_variant
AT1G03410	-2.47458	3.75437	1.07716e-48	3.02332e-45	DOWN		2-oxoglutarate (2OG) and Fe(II)-dependent oxygenase superfamily protein	2A6; FUNCTIONS IN: oxidoreductase activity; LOCATED IN: endomembrane system; EXPRESSED IN: 17 plant structures; EXPRESSED DURING: 10 growth stages; CONTAINS InterPro DOMAIN/s: Oxoglutarate/iron-dependent oxygenase (InterPro:IPR005123); BEST Arabidopsis thaliana protein match is: 2-oxoglutarate (2OG) and Fe(II)-dependent oxygenase superfamily protein (TAIR:AT1G03400.1)	Isopenicillin N synthase-like | Non-haem dioxygenase N-terminal domain | Oxoglutarate/iron-dependent dioxygenase	NO
AT1G03440	-0.42989	5.45853	0.00323167	0.0248791	DOWN		Leucine-rich repeat (LRR) family protein	Leucine-rich repeat (LRR) family protein; INVOLVED IN: signal transduction; LOCATED IN: endomembrane system; EXPRESSED IN: 23 plant structures; EXPRESSED DURING: 13 growth stages; CONTAINS InterPro DOMAIN/s: Leucine-rich repeat-containing N-terminal domain, type 2 (InterPro:IPR013210), Leucine-rich repeat (InterPro:IPR001611); BEST Arabidopsis thaliana protein match is: RNI-like superfamily prote…	Leucine rich repeat 4 | Leucine-rich repeat | Leucine-rich repeat-containing N-terminal, type 2	YES	1:854093:C-CT;exonic_variant
AT1G03530	0.456806	3.22486	0.00305733	0.0237705	UP		nuclear assembly factor 1	nuclear assembly factor 1 (NAF1); FUNCTIONS IN: snoRNA binding, pseudouridine synthase activity; INVOLVED IN: biological_process unknown; LOCATED IN: box H/ACA snoRNP complex; EXPRESSED IN: 23 plant structures; EXPRESSED DURING: 13 growth stages; CONTAINS InterPro DOMAIN/s: H/ACA ribonucleoprotein complex, subunit Gar1/Naf1 (InterPro:IPR007504)	H/ACA ribonucleoprotein complex, subunit Gar1/Naf1 | Translation protein, beta-barrel domain	NO
AT1G03545	0.824596	-0.165049	0.00367089	0.0275304	UP					YES	1:886544:G-GT;exonic_variant
AT1G03550	-1.96118	3.05978	6.24408e-32	6.00876e-29	DOWN		Secretory carrier membrane protein (SCAMP) family protein	Secretory carrier membrane protein (SCAMP) family protein; FUNCTIONS IN: transmembrane transporter activity; INVOLVED IN: protein transport; LOCATED IN: integral to membrane; EXPRESSED IN: 23 plant structures; EXPRESSED DURING: 15 growth stages; CONTAINS InterPro DOMAIN/s: SCAMP (InterPro:IPR007273); BEST Arabidopsis thaliana protein match is: Secretory carrier membrane protein (SCAMP) family pro…	SCAMP	YES	1:886544:G-GT;splice_donor_region_variant
AT1G03590	0.649885	5.17902	4.86425e-09	2.81017e-07	UP		Protein phosphatase 2C family protein	Protein phosphatase 2C family protein; FUNCTIONS IN: protein serine/threonine phosphatase activity, catalytic activity; INVOLVED IN: N-terminal protein myristoylation; LOCATED IN: plasma membrane; EXPRESSED IN: 23 plant structures; EXPRESSED DURING: 13 growth stages; CONTAINS InterPro DOMAIN/s: Protein phosphatase 2C-related (InterPro:IPR001932), Protein phosphatase 2C (InterPro:IPR015655), Prote…	Protein phosphatase 2C | Protein phosphatase 2C (PP2C)-like domain	YES	1:895475:G-GA;splice_acceptor_region_variant
AT1G03610	0.805362	6.7488	1.08628e-10	8.81617e-09	UP		Protein of unknown function (DUF789)	Protein of unknown function (DUF789); CONTAINS InterPro DOMAIN/s: Protein of unknown function DUF789 (InterPro:IPR008507); BEST Arabidopsis thaliana protein match is: Protein of unknown function (DUF789) (TAIR:AT4G03420.1)	Protein of unknown function DUF789	NO
AT1G03680	-0.378071	7.89803	6.11646e-05	0.00096763	DOWN		thioredoxin M-type 1	thioredoxin M-type 1 (THM1); FUNCTIONS IN: enzyme activator activity; INVOLVED IN: response to oxidative stress, response to cold, positive regulation of catalytic activity; LOCATED IN: thylakoid, apoplast, stromule, chloroplast, chloroplast stroma; EXPRESSED IN: 24 plant structures; EXPRESSED DURING: 14 growth stages; CONTAINS InterPro DOMAIN/s: Thioredoxin fold (InterPro:IPR012335), Thioredoxin…	Thioredoxin | Thioredoxin domain | Thioredoxin, conserved site | Thioredoxin-like fold	NO
AT1G03710	-3.53395	-3.05682	0.00114887	0.0108329	DOWN		Cystatin/monellin superfamily protein	Cystatin/monellin superfamily protein; FUNCTIONS IN: cysteine-type endopeptidase inhibitor activity; INVOLVED IN: biological_process unknown; LOCATED IN: cellular_component unknown; EXPRESSED IN: 10 plant structures; EXPRESSED DURING: 8 growth stages; CONTAINS InterPro DOMAIN/s: Proteinase inhibitor I25, cystatin (InterPro:IPR000010), Proteinase inhibitor I25, cystatin, conserved region (InterPro…	Cystatin-related, plant | Proteinase inhibitor I25, cystatin | Proteinase inhibitor I25, cystatin, conserved region	NO
AT1G03760	0.80996	3.21582	4.44077e-07	1.47535e-05	UP		Prefoldin chaperone subunit family protein	Prefoldin chaperone subunit family protein; FUNCTIONS IN: unfolded protein binding; INVOLVED IN: protein folding; LOCATED IN: prefoldin complex; EXPRESSED IN: pollen tube; CONTAINS InterPro DOMAIN/s: Prefoldin alpha-like (InterPro:IPR004127), Prefoldin (InterPro:IPR009053)	Prefoldin | Prefoldin alpha-like	NO
AT1G03780	0.785237	2.60335	0.000274438	0.00335784	UP		targeting protein for XKLP2	targeting protein for XKLP2 (TPX2); FUNCTIONS IN: microtubule binding; INVOLVED IN: spindle assembly; LOCATED IN: nucleus; LOCATED IN: nucleus, chloroplast envelope; EXPRESSED IN: 14 plant structures; EXPRESSED DURING: 7 growth stages; CONTAINS InterPro DOMAIN/s: Cell cycle regulated microtubule associated protein (InterPro:IPR022021); CONTAINS InterPro DOMAIN/s: Cell cycle regulated microtubule …	TPX2 | TPX2 central domain | TPX2, C-terminal domain	NO
AT1G03790	0.699878	3.972	0.00355366	0.0268124	UP		Zinc finger C-x8-C-x5-C-x3-H type family protein	SOMNUS (SOM); CONTAINS InterPro DOMAIN/s: Zinc finger, CCCH-type (InterPro:IPR000571); BEST Arabidopsis thaliana protein match is: Zinc finger C-x8-C-x5-C-x3-H type family protein (TAIR:AT5G44260.1)	Zinc finger, CCCH-type	NO
AT1G03830	0.708085	2.93194	7.31587e-06	0.000160525	UP		guanylate-binding family protein	guanylate-binding family protein; FUNCTIONS IN: GTP binding, GTPase activity; INVOLVED IN: immune response; LOCATED IN: cellular_component unknown; EXPRESSED IN: 12 plant structures; EXPRESSED DURING: 6 growth stages; CONTAINS InterPro DOMAIN/s: Guanylate-binding protein, N-terminal (InterPro:IPR015894), Guanylate-binding protein, C-terminal (InterPro:IPR003191); BEST Arabidopsis thaliana protein…	Guanylate-binding protein, C-terminal | Guanylate-binding protein, N-terminal | P-loop containing nucleoside triphosphate hydrolase	NO
AT1G03860	0.470528	5.68232	6.48718e-06	0.000144794	UP		prohibitin 2	prohibitin 2 (PHB2); INVOLVED IN: biological_process unknown; LOCATED IN: in 7 components; LOCATED IN: in 8 components; EXPRESSED IN: 30 plant structures; EXPRESSED DURING: 14 growth stages; CONTAINS InterPro DOMAIN/s: Prohibitin (InterPro:IPR000163), Band 7 protein (InterPro:IPR001107); BEST Arabidopsis thaliana protein match is: prohibitin 1 (TAIR:AT4G28510.1); BEST Arabidopsis thaliana protein…	Band 7 protein | Prohibitin	NO
AT1G03910	0.356828	5.85951	0.000233524	0.00293102	UP	YES		EXPRESSED IN: 24 plant structures; EXPRESSED IN: 25 plant structures; EXPRESSED DURING: 13 growth stages; CONTAINS InterPro DOMAIN/s: Cactin protein, cactus-binding domain, C-terminal (InterPro:IPR019134), Cactin, central region (InterPro:IPR018816); BEST Arabidopsis thaliana protein match is: unknown protein (TAIR:AT2G36815.2)	Cactin, C-terminal | Cactin, central domain	NO
AT1G03935	-1.07332	0.867972	6.15563e-05	0.000971545	DOWN		snoRNA	snoRNA		NO
AT1G03970	0.334199	5.00325	0.000830862	0.00830147	UP		G-box binding factor 4	G-box binding factor 4 (GBF4); FUNCTIONS IN: sequence-specific DNA binding, DNA binding, sequence-specific DNA binding transcription factor activity; INVOLVED IN: regulation of transcription, DNA-dependent; LOCATED IN: nucleus; EXPRESSED IN: 22 plant structures; EXPRESSED DURING: 13 growth stages; CONTAINS InterPro DOMAIN/s: Basic-leucine zipper (bZIP) transcription factor (InterPro:IPR004827), b…	Basic-leucine zipper domain	NO
AT1G04000	-0.498784	3.16807	0.00182198	0.01564	DOWN			unknown protein; BEST Arabidopsis thaliana protein match is: unknown protein (TAIR:AT5G44060.1)		NO
AT1G04090	-3.1549	-1.86735	3.36228e-06	8.27209e-05	DOWN		Plant protein of unknown function (DUF946)	Plant protein of unknown function (DUF946); CONTAINS InterPro DOMAIN/s: Protein of unknown function DUF946 (InterPro:IPR009291); BEST Arabidopsis thaliana protein match is: Plant protein of unknown function (DUF946) (TAIR:AT5G43950.1)	Vacuolar protein sorting-associated protein 62	NO
AT1G04110	0.806288	2.10365	0.000342142	0.00404946	UP		Subtilase family protein	STOMATAL DENSITY AND DISTRIBUTION (SDD1); CONTAINS InterPro DOMAIN/s: Protease-associated PA (InterPro:IPR003137), Proteinase inhibitor, propeptide (InterPro:IPR009020), Peptidase S8/S53, subtilisin/kexin/sedolisin (InterPro:IPR000209), Peptidase S8, subtilisin-related (InterPro:IPR015500), Peptidase S8/S53, subtilisin, active site (InterPro:IPR022398), Proteinase inhibitor I9, subtilisin propept…	Peptidase S8, subtilisin, Ser-active site | Peptidase S8, subtilisin-related | Peptidase S8/S53 domain | Protease-associated domain, PA | Proteinase inhibitor I9	NO
AT1G04130	0.418982	3.49937	0.00163697	0.0143767	UP		Tetratricopeptide repeat (TPR)-like superfamily protein	Tetratricopeptide repeat (TPR)-like superfamily protein; FUNCTIONS IN: binding; INVOLVED IN: biological_process unknown; LOCATED IN: cellular_component unknown; EXPRESSED IN: 22 plant structures; EXPRESSED DURING: 13 growth stages; CONTAINS InterPro DOMAIN/s: Tetratricopeptide-like helical (InterPro:IPR011990), Tetratricopeptide repeat-containing (InterPro:IPR013026), Tetratricopeptide repeat (In…	Tetratricopeptide repeat-containing domain | Tetratricopeptide-like helical domain	NO
AT1G04190	0.439125	4.45398	6.01564e-05	0.00095482	UP		Tetratricopeptide repeat (TPR)-like superfamily protein	Tetratricopeptide repeat (TPR)-like superfamily protein; FUNCTIONS IN: binding; INVOLVED IN: biological_process unknown; LOCATED IN: cellular_component unknown; EXPRESSED IN: 22 plant structures; EXPRESSED DURING: 13 growth stages; CONTAINS InterPro DOMAIN/s: Tetratricopeptide TPR-1 (InterPro:IPR001440), Tetratricopeptide-like helical (InterPro:IPR011990), Tetratricopeptide repeat-containing (Int…	Tetratricopeptide TPR1 | Tetratricopeptide repeat | Tetratricopeptide repeat-containing domain | Tetratricopeptide-like helical domain	NO
AT1G04220	-0.542852	4.70586	0.00206515	0.017337	DOWN		3-ketoacyl-CoA synthase 2	3-ketoacyl-CoA synthase 2 (KCS2); FUNCTIONS IN: fatty acid elongase activity; INVOLVED IN: response to wounding, response to osmotic stress, suberin biosynthetic process; LOCATED IN: membrane; EXPRESSED IN: 17 plant structures; EXPRESSED DURING: 6 growth stages; CONTAINS InterPro DOMAIN/s: Thiolase-like (InterPro:IPR016039), Very-long-chain 3-ketoacyl-CoA synthase (InterPro:IPR012392), 3-Oxoacyl-…	3-Oxoacyl-[acyl-carrier-protein (ACP)] synthase III C-terminal | FAE1/Type III polyketide synthase-like protein | Thiolase-like | Thiolase-like, subgroup | Very-long-chain 3-ketoacyl-CoA synthase	NO
AT1G04270	0.463185	7.61218	6.80304e-07	2.13545e-05	UP		cytosolic ribosomal protein S15	cytosolic ribosomal protein S15 (RPS15); FUNCTIONS IN: structural constituent of ribosome; INVOLVED IN: translation; LOCATED IN: cytosolic small ribosomal subunit, cytosolic ribosome, plasma membrane; EXPRESSED IN: 24 plant structures; EXPRESSED DURING: 14 growth stages; CONTAINS InterPro DOMAIN/s: Ribosomal protein S15, eukaryotic/archaeal (InterPro:IPR005713), Ribosomal protein S19/S15 (InterPr…	Ribosomal protein S19 conserved site | Ribosomal protein S19, superfamily | Ribosomal protein S19/S15 | Ribosomal protein S19A/S15e	NO
AT1G04310	0.430886	5.40606	0.00146839	0.0131955	UP		ethylene response sensor 2	ethylene response sensor 2 (ERS2); FUNCTIONS IN: ethylene binding, protein histidine kinase activity, receptor activity, glycogen synthase kinase 3 activity; INVOLVED IN: negative regulation of ethylene mediated signaling pathway; LOCATED IN: endomembrane system, membrane; EXPRESSED IN: 22 plant structures; EXPRESSED DURING: 9 growth stages; CONTAINS InterPro DOMAIN/s: Signal transduction histidi…	GAF domain | GAF domain-like | Signal transduction histidine kinase EnvZ-like, dimerisation/phosphoacceptor domain | Signal transduction histidine kinase, homodimeric domain	YES	1:1157765:TGA-T;exonic_variant
AT1G04350	-0.787941	6.55368	3.99212e-17	1.00342e-14	DOWN		2-oxoglutarate (2OG) and Fe(II)-dependent oxygenase superfamily protein	2-oxoglutarate (2OG) and Fe(II)-dependent oxygenase superfamily protein; CONTAINS InterPro DOMAIN/s: Oxoglutarate/iron-dependent oxygenase (InterPro:IPR005123); BEST Arabidopsis thaliana protein match is: 2-oxoglutarate (2OG) and Fe(II)-dependent oxygenase superfamily protein (TAIR:AT5G59540.1)	Isopenicillin N synthase-like | Non-haem dioxygenase N-terminal domain | Oxoglutarate/iron-dependent dioxygenase	NO
AT1G04480	0.458169	6.30647	1.28867e-05	0.00026037	UP		Ribosomal protein L14p/L23e family protein	Ribosomal protein L14p/L23e family protein; FUNCTIONS IN: structural constituent of ribosome; INVOLVED IN: translation; LOCATED IN: ribosome, intracellular; EXPRESSED IN: 24 plant structures; EXPRESSED DURING: 15 growth stages; CONTAINS InterPro DOMAIN/s: Ribosomal protein L14b/L23e (InterPro:IPR000218), Ribosomal protein L14 conserved site (InterPro:IPR019972); BEST Arabidopsis thaliana protein …	Ribosomal protein L14 conserved site | Ribosomal protein L14 domain | Ribosomal protein L14b/L23e	NO
AT1G04510	0.278621	5.57556	0.00403186	0.0295854	UP	YES	MOS4-associated complex 3A	MOS4-associated complex 3A (MAC3A); FUNCTIONS IN: ubiquitin-protein ligase activity, nucleotide binding; INVOLVED IN: response to cadmium ion, defense response to bacterium; LOCATED IN: nucleolus, nucleus, CUL4 RING ubiquitin ligase complex; EXPRESSED IN: 25 plant structures; EXPRESSED DURING: 13 growth stages; CONTAINS InterPro DOMAIN/s: WD40 repeat 2 (InterPro:IPR019782), U box domain (InterPro…	Pre-mRNA-splicing factor 19 | U box domain | WD40 repeat | WD40-repeat-containing domain | WD40/YVTN repeat-like-containing domain | Zinc finger, RING/FYVE/PHD-type	YES	1:1228193:T-TTA;intronic_variant
AT1G04620	0.856884	3.01145	7.94461e-08	3.2913e-06	UP		coenzyme F420 hydrogenase family / dehydrogenase, beta subunit family	coenzyme F420 hydrogenase family / dehydrogenase, beta subunit family; FUNCTIONS IN: coenzyme F420 hydrogenase activity; INVOLVED IN: biological_process unknown; LOCATED IN: chloroplast; EXPRESSED IN: 22 plant structures; EXPRESSED DURING: 13 growth stages; CONTAINS InterPro DOMAIN/s: Coenzyme F420 hydrogenase/dehydrogenase beta subunit, C-terminal (InterPro:IPR007525), Coenzyme F420 hydrogenase/…	Coenzyme F420 hydrogenase/dehydrogenase beta subunit, C-terminal | Coenzyme F420 hydrogenase/dehydrogenase beta subunit, N-terminal	NO
AT1G04640	-0.303255	4.59427	0.0045316	0.032426	DOWN		lipoyltransferase 2	lipoyltransferase 2 (LIP2); CONTAINS InterPro DOMAIN/s: Octanoyltransferase (InterPro:IPR000544), Octanoyltransferase, conserved site (InterPro:IPR020605), Biotin/lipoate A/B protein ligase (InterPro:IPR004143); BEST Arabidopsis thaliana protein match is: Biotin/lipoate A/B protein ligase family (TAIR:AT4G31050.1)	Biotin/lipoate A/B protein ligase | Octanoyltransferase | Octanoyltransferase, conserved site	NO
AT1G04680	0.613294	4.937	0.000329405	0.00392177	UP		Pectin lyase-like superfamily protein	Pectin lyase-like superfamily protein; FUNCTIONS IN: lyase activity, pectate lyase activity; INVOLVED IN: biological_process unknown; LOCATED IN: membrane; EXPRESSED IN: 23 plant structures; EXPRESSED DURING: 13 growth stages; CONTAINS InterPro DOMAIN/s: Pectin lyase fold/virulence factor (InterPro:IPR011050), AmbAllergen (InterPro:IPR018082), Pectate lyase/Amb allergen (InterPro:IPR002022), Pect…	AmbAllergen | Pectate lyase/Amb allergen | Pectin lyase fold | Pectin lyase fold/virulence factor	NO
AT1G04730	0.868585	2.12205	2.688e-07	9.52996e-06	UP		P-loop containing nucleoside triphosphate hydrolases superfamily protein	CHROMOSOME TRANSMISSION FIDELITY 18 (CTF18); FUNCTIONS IN: nucleoside-triphosphatase activity, ATPase activity, nucleotide binding, ATP binding; INVOLVED IN: sister chromatid cohesion; LOCATED IN: replication fork; EXPRESSED IN: 25 plant structures; EXPRESSED DURING: 13 growth stages; CONTAINS InterPro DOMAIN/s: ATPase, AAA+ type, core (InterPro:IPR003593), ATPase, AAA-type, core (InterPro:IPR003…	AAA+ ATPase domain | ATPase, AAA-type, core | P-loop containing nucleoside triphosphate hydrolase	NO
AT1G04760	0.724275	0.423976	0.00567483	0.0387932	UP		vesicle-associated membrane protein 726	vesicle-associated membrane protein 726 (VAMP726); FUNCTIONS IN: molecular_function unknown; INVOLVED IN: transport, vesicle-mediated transport; LOCATED IN: endosome, plasma membrane, chloroplast, membrane; EXPRESSED IN: 22 plant structures; EXPRESSED DURING: 13 growth stages; CONTAINS InterPro DOMAIN/s: Longin (InterPro:IPR010908), Longin-like (InterPro:IPR011012), Synaptobrevin (InterPro:IPR001…	Longin domain | Longin-like domain | Synaptobrevin	NO
AT1G04770	-0.75275	3.96423	0.00475414	0.0336396	DOWN		Tetratricopeptide repeat (TPR)-like superfamily protein	Tetratricopeptide repeat (TPR)-like superfamily protein; FUNCTIONS IN: binding; INVOLVED IN: biological_process unknown; EXPRESSED IN: 23 plant structures; EXPRESSED DURING: 13 growth stages; CONTAINS InterPro DOMAIN/s: Tetratricopeptide TPR-1 (InterPro:IPR001440), Tetratricopeptide-like helical (InterPro:IPR011990), Tetratricopeptide repeat-containing (InterPro:IPR013026), Tetratricopeptide repe…		NO
AT1G04810	0.283765	5.90212	0.00504911	0.035348	UP		26S proteasome regulatory complex, non-ATPase subcomplex, Rpn2/Psmd1 subunit	26S proteasome regulatory complex, non-ATPase subcomplex, Rpn2/Psmd1 subunit; FUNCTIONS IN: enzyme regulator activity, binding; INVOLVED IN: protein catabolic process, ubiquitin-dependent protein catabolic process; LOCATED IN: proteasome regulatory particle, base subcomplex, proteasome complex, nucleus, plasma membrane; EXPRESSED IN: 23 plant structures; EXPRESSED DURING: 13 growth stages; CONTAI…	26S proteasome regulatory complex, non-ATPase subcomplex, Rpn2/Psmd1 subunit | Armadillo-like helical | Armadillo-type fold | Proteasome/cyclosome repeat	NO
AT1G04820	0.450946	8.02916	0.00103648	0.00994575	UP		tubulin alpha-4 chain	tubulin alpha-4 chain (TUA4); FUNCTIONS IN: structural constituent of cytoskeleton; INVOLVED IN: response to cadmium ion, microtubule-based process, cellular response to gravity; LOCATED IN: tubulin complex, cytosol, cell wall, plasma membrane, chloroplast; EXPRESSED IN: 29 plant structures; EXPRESSED DURING: 15 growth stages; CONTAINS InterPro DOMAIN/s: Alpha tubulin (InterPro:IPR002452), Tubuli…	Alpha tubulin | Tubulin | Tubulin, C-terminal | Tubulin, conserved site | Tubulin/FtsZ, 2-layer sandwich domain | Tubulin/FtsZ, C-terminal | Tubulin/FtsZ, GTPase domain	NO
AT1G04840	0.669077	0.879804	0.0073233	0.0473428	UP		Tetratricopeptide repeat (TPR)-like superfamily protein	Tetratricopeptide repeat (TPR)-like superfamily protein; CONTAINS InterPro DOMAIN/s: Pentatricopeptide repeat (InterPro:IPR002885); BEST Arabidopsis thaliana protein match is: Tetratricopeptide repeat (TPR)-like superfamily protein (TAIR:AT1G74630.1)	Pentatricopeptide repeat | Tetratricopeptide-like helical domain	NO
AT1G04870	0.667389	4.80744	1.33957e-06	3.79781e-05	UP		protein arginine methyltransferase 10	protein arginine methyltransferase 10 (PRMT10); FUNCTIONS IN: histone-arginine N-methyltransferase activity, methyltransferase activity, protein-arginine omega-N asymmetric methyltransferase activity, [myelin basic protein]-arginine N-methyltransferase activity, protein-arginine omega-N monomethyltransferase activity; FUNCTIONS IN: methyltransferase activity; INVOLVED IN: vegetative to reproducti…	Protein arginine N-methyltransferase | S-adenosyl-L-methionine-dependent methyltransferase-like	NO
AT1G04900	0.640444	2.89958	0.000180525	0.00236035	UP		Protein of unknown function (DUF185)	Protein of unknown function (DUF185); CONTAINS InterPro DOMAIN/s: Protein of unknown function DUF185 (InterPro:IPR003788)	Putative S-adenosyl-L-methionine-dependent methyltransferase MidA | S-adenosyl-L-methionine-dependent methyltransferase-like	NO
AT1G04910	0.373467	5.06119	0.000160578	0.0021445	UP		O-fucosyltransferase family protein	O-fucosyltransferase family protein; CONTAINS InterPro DOMAIN/s: GDP-fucose protein O-fucosyltransferase (InterPro:IPR019378); BEST Arabidopsis thaliana protein match is: O-fucosyltransferase family protein (TAIR:AT1G22460.1)	GDP-fucose protein O-fucosyltransferase | O-fucosyltransferase, plant	NO
AT1G04970	-0.357133	5.71103	0.000181396	0.00236806	DOWN		lipid-binding serum glycoprotein family protein	lipid-binding serum glycoprotein family protein; FUNCTIONS IN: lipid binding; INVOLVED IN: biological_process unknown; LOCATED IN: plasma membrane, vacuole; EXPRESSED IN: 25 plant structures; EXPRESSED DURING: 15 growth stages; CONTAINS InterPro DOMAIN/s: Bactericidal permeability-increasing protein, alpha/beta domain (InterPro:IPR017943), Lipid-binding serum glycoprotein, N-terminal (InterPro:IP…	Bactericidal permeability-increasing protein, alpha/beta domain | Lipid-binding serum glycoprotein, C-terminal | Lipid-binding serum glycoprotein, N-terminal	NO
AT1G04980	0.601717	2.99419	0.00515714	0.0359697	UP		PDI-like 2-2	PDI-like 2-2 (PDIL2-2); CONTAINS InterPro DOMAIN/s: Thioredoxin fold (InterPro:IPR012335), Disulphide isomerase (InterPro:IPR005788), Thioredoxin domain (InterPro:IPR013766), Thioredoxin, conserved site (InterPro:IPR017937), Thioredoxin-like subdomain (InterPro:IPR006662), Thioredoxin-like (InterPro:IPR017936), Thioredoxin-like fold (InterPro:IPR012336); BEST Arabidopsis thaliana protein match is…	Disulphide isomerase | Thioredoxin domain | Thioredoxin, conserved site | Thioredoxin-like fold	NO
AT1G05020	0.859545	2.02818	0.000238033	0.00297483	UP		ENTH/ANTH/VHS superfamily protein	ENTH/ANTH/VHS superfamily protein; FUNCTIONS IN: phospholipid binding, clathrin binding, binding, phosphatidylinositol binding; INVOLVED IN: clathrin coat assembly; LOCATED IN: clathrin coat; EXPRESSED IN: 11 plant structures; EXPRESSED DURING: L mature pollen stage, M germinated pollen stage, 4 anthesis, petal differentiation and expansion stage, LP.08 eight leaves visible; CONTAINS InterPro DOM…	AP180 N-terminal homology (ANTH) domain | Clathrin adaptor, phosphoinositide-binding, GAT-like | ENTH/VHS | Epsin-like, N-terminal	NO
AT1G05090	0.448045	3.64419	0.00278052	0.0219734	UP		dentin sialophosphoprotein-related	dentin sialophosphoprotein-related; BEST Arabidopsis thaliana protein match is: dentin sialophosphoprotein-related (TAIR:AT4G20720.1)		NO
AT1G05100	0.95181	0.754975	0.00202877	0.0170828	UP		mitogen-activated protein kinase kinase kinase 18	mitogen-activated protein kinase kinase kinase 18 (MAPKKK18); FUNCTIONS IN: protein serine/threonine kinase activity, protein kinase activity, kinase activity, ATP binding; INVOLVED IN: protein amino acid phosphorylation; EXPRESSED IN: 6 plant structures; EXPRESSED DURING: 4 anthesis, petal differentiation and expansion stage; CONTAINS InterPro DOMAIN/s: Protein kinase, ATP binding site (InterPro…	Protein kinase domain | Protein kinase, ATP binding site | Protein kinase-like domain | Serine/threonine-protein kinase, active site | Serine/threonine/dual specificity protein kinase, catalytic domain	NO
AT1G05140	-0.306061	6.28734	0.00174617	0.015115	DOWN		Peptidase M50 family protein	Peptidase M50 family protein; FUNCTIONS IN: metalloendopeptidase activity; INVOLVED IN: proteolysis; LOCATED IN: chloroplast, plastid; EXPRESSED IN: 22 plant structures; EXPRESSED DURING: 13 growth stages; CONTAINS InterPro DOMAIN/s: Peptidase M50 (InterPro:IPR008915), PDZ/DHR/GLGF (InterPro:IPR001478), Peptidase M50, putative membrane-associated zinc metallopeptidase (InterPro:IPR004387); BEST A…	PDZ domain | Peptidase M50	NO
AT1G05180	0.441881	5.05718	3.18089e-05	0.000560919	UP		NAD(P)-binding Rossmann-fold superfamily protein	AUXIN RESISTANT 1 (AXR1); CONTAINS InterPro DOMAIN/s: Molybdenum cofactor biosynthesis, MoeB (InterPro:IPR009036), NAD(P)-binding domain (InterPro:IPR016040); CONTAINS InterPro DOMAIN/s: Molybdenum cofactor biosynthesis, MoeB (InterPro:IPR009036), UBA/THIF-type NAD/FAD binding fold (InterPro:IPR000594), NAD(P)-binding domain (InterPro:IPR016040); BEST Arabidopsis thaliana protein match is: AXR1-l…	Molybdenum cofactor biosynthesis, MoeB | NAD(P)-binding domain | UBA/THIF-type NAD/FAD binding fold	NO
AT1G05210	0.73955	0.957104	0.00161229	0.0142081	UP		Transmembrane protein 97, predicted	Transmembrane protein 97, predicted; FUNCTIONS IN: molecular_function unknown; INVOLVED IN: biological_process unknown; LOCATED IN: endomembrane system; EXPRESSED IN: 17 plant structures; EXPRESSED DURING: 11 growth stages; CONTAINS InterPro DOMAIN/s: Transmembrane protein 97, predicted (InterPro:IPR016964); BEST Arabidopsis thaliana protein match is: Transmembrane protein 97, predicted (TAIR:AT2…	Transmembrane protein 6/97	NO
AT1G05250	-1.35031	2.77573	3.1456e-05	0.000554986	DOWN		Peroxidase superfamily protein	Peroxidase superfamily protein; FUNCTIONS IN: peroxidase activity, heme binding; INVOLVED IN: response to oxidative stress, oxidation reduction; LOCATED IN: endomembrane system; CONTAINS InterPro DOMAIN/s: Haem peroxidase (InterPro:IPR010255), Plant peroxidase (InterPro:IPR000823), Peroxidases heam-ligand binding site (InterPro:IPR019793), Peroxidase, active site (InterPro:IPR019794), Haem peroxi…	Haem peroxidase | Haem peroxidase, plant/fungal/bacterial | Peroxidase, active site | Peroxidases heam-ligand binding site | Plant peroxidase	NO
AT1G05310	-0.955239	2.4695	0.00355214	0.026807	DOWN		Pectin lyase-like superfamily protein	Pectin lyase-like superfamily protein; FUNCTIONS IN: pectinesterase activity; INVOLVED IN: cell wall modification; LOCATED IN: endomembrane system, cell wall, plant-type cell wall; EXPRESSED IN: 12 plant structures; EXPRESSED DURING: 6 growth stages; CONTAINS InterPro DOMAIN/s: Pectinesterase, active site (InterPro:IPR018040), Pectin lyase fold/virulence factor (InterPro:IPR011050), Pectinesteras…	Pectin lyase fold | Pectin lyase fold/virulence factor | Pectinesterase, active site | Pectinesterase, catalytic	NO
AT1G05360	0.593888	4.74112	0.000128981	0.00178995	UP			BEST Arabidopsis thaliana protein match is: SNARE associated Golgi protein family (TAIR:AT4G14950.1)		NO
AT1G05370	0.714284	1.13387	0.00255473	0.0205585	UP		Sec14p-like phosphatidylinositol transfer family protein	Sec14p-like phosphatidylinositol transfer family protein; CONTAINS InterPro DOMAIN/s: Cellular retinaldehyde-binding/triple function, C-terminal (InterPro:IPR001251), Phosphatidylinositol transfer protein-like, N-terminal (InterPro:IPR011074); BEST Arabidopsis thaliana protein match is: Sec14p-like phosphatidylinositol transfer family protein (TAIR:AT3G22410.1)	CRAL-TRIO domain | CRAL/TRIO, N-terminal domain	NO
AT1G05385	-0.829228	4.13817	4.36315e-10	3.15355e-08	DOWN		photosystem II 11 kDa protein-related	LOW PSII ACCUMULATION 19 (LPA19); FUNCTIONS IN: molecular_function unknown; INVOLVED IN: photosystem II assembly; LOCATED IN: chloroplast thylakoid lumen, chloroplast; EXPRESSED IN: 24 plant structures; EXPRESSED DURING: 15 growth stages	Photosystem II Pbs27	NO
AT1G05420	-1.44165	-1.30934	0.00658752	0.0436416	DOWN		ovate family protein 12	ovate family protein 12 (OFP12); CONTAINS InterPro DOMAIN/s: Protein of unknown function DUF623 (InterPro:IPR006458); BEST Arabidopsis thaliana protein match is: ovate family protein 16 (TAIR:AT2G32100.1)	Ovate protein family, C-terminal	NO
AT1G05440	1.00827	0.0530076	0.000791193	0.00797659	UP		C-8 sterol isomerases	C-8 sterol isomerases; FUNCTIONS IN: C-8 sterol isomerase activity; INVOLVED IN: ergosterol biosynthetic process; LOCATED IN: endoplasmic reticulum; EXPRESSED IN: 14 plant structures; EXPRESSED DURING: 7 growth stages; CONTAINS InterPro DOMAIN/s: ERG2/sigma1 receptor-like (InterPro:IPR006716)	ERG2/sigma1 receptor-like | Sigma non-opioid intracellular receptor 1	NO
AT1G05460	0.572794	3.80832	3.25769e-06	8.0678e-05	UP	YES	P-loop containing nucleoside triphosphate hydrolases superfamily protein	SILENCING DEFECTIVE (SDE3); FUNCTIONS IN: RNA helicase activity; INVOLVED IN: virus induced gene silencing; LOCATED IN: cellular_component unknown; EXPRESSED IN: 19 plant structures; EXPRESSED DURING: 9 growth stages; CONTAINS InterPro DOMAIN/s: Restriction endonuclease, type I, R subunit/Type III, Res subunit (InterPro:IPR006935), DNA helicase, UvrD/REP type (InterPro:IPR000212); BEST Arabidopsi…	P-loop containing nucleoside triphosphate hydrolase | Probable RNA helicase SDE3	NO
AT1G05500	0.293311	5.59657	0.00234247	0.0191963	UP		Calcium-dependent lipid-binding (CaLB domain) family protein	NTMC2T2.1; FUNCTIONS IN: molecular_function unknown; INVOLVED IN: biological_process unknown; LOCATED IN: endomembrane system, plasma membrane; EXPRESSED IN: 25 plant structures; EXPRESSED DURING: 13 growth stages; CONTAINS InterPro DOMAIN/s: C2 membrane targeting protein (InterPro:IPR018029), C2 calcium/lipid-binding domain, CaLB (InterPro:IPR008973), C2 region (InterPro:IPR020477), C2 calcium-d…	C2 domain	NO
AT1G05510	-2.52882	-1.38276	0.000525056	0.00571386	DOWN		Protein of unknown function (DUF1264)	FUNCTIONS IN: molecular_function unknown; INVOLVED IN: response to abscisic acid stimulus; LOCATED IN: cellular_component unknown; EXPRESSED IN: seed; EXPRESSED DURING: seedling growth, seed development stages; CONTAINS InterPro DOMAIN/s: Protein of unknown function DUF1264 (InterPro:IPR010686); BEST Arabidopsis thaliana protein match is: Protein of unknown function (DUF1264) (TAIR:AT2G31985.1)	Protein of unknown function DUF1264	NO
AT1G05560	-0.708675	5.52012	4.21196e-06	9.98333e-05	DOWN		UDP-glucosyltransferase 75B1	UDP-glucosyltransferase 75B1 (UGT75B1); CONTAINS InterPro DOMAIN/s: UDP-glucuronosyl/UDP-glucosyltransferase (InterPro:IPR002213); BEST Arabidopsis thaliana protein match is: UDP-glucosyl transferase 75B2 (TAIR:AT1G05530.1)		NO
AT1G05562	-0.671979	3.96603	7.0747e-07	2.20837e-05	DOWN					NO
AT1G05600	0.648223	3.81836	1.09204e-06	3.16806e-05	UP		Tetratricopeptide repeat (TPR)-like superfamily protein	Tetratricopeptide repeat (TPR)-like superfamily protein; FUNCTIONS IN: molecular_function unknown; INVOLVED IN: biological_process unknown; LOCATED IN: cellular_component unknown; EXPRESSED IN: 21 plant structures; EXPRESSED DURING: 13 growth stages; CONTAINS InterPro DOMAIN/s: Pentatricopeptide repeat (InterPro:IPR002885); BEST Arabidopsis thaliana protein match is: Pentatricopeptide repeat (PPR…	Pentatricopeptide repeat | Tetratricopeptide-like helical domain	NO
AT1G05680	-1.68365	3.39138	2.26308e-05	0.000417332	DOWN		Uridine diphosphate glycosyltransferase 74E2	Uridine diphosphate glycosyltransferase 74E2 (UGT74E2); CONTAINS InterPro DOMAIN/s: UDP-glucuronosyl/UDP-glucosyltransferase (InterPro:IPR002213); BEST Arabidopsis thaliana protein match is: UDP-Glycosyltransferase superfamily protein (TAIR:AT1G05675.1)	UDP-glucuronosyl/UDP-glucosyltransferase	NO
AT1G05720	0.5135	4.01543	5.14167e-05	0.000842299	UP		selenoprotein family protein	selenoprotein family protein; FUNCTIONS IN: selenium binding; INVOLVED IN: biological_process unknown; LOCATED IN: endomembrane system; EXPRESSED IN: 22 plant structures; EXPRESSED DURING: 13 growth stages; CONTAINS InterPro DOMAIN/s: Sep15/SelM redox (InterPro:IPR014912)	Sep15/SelM redox | Thioredoxin-like fold	NO
AT1G05730	1.65046	-0.552833	4.05518e-06	9.66613e-05	UP		Eukaryotic protein of unknown function (DUF842)	Eukaryotic protein of unknown function (DUF842); CONTAINS InterPro DOMAIN/s: Protein of unknown function DUF842, eukaryotic (InterPro:IPR008560); BEST Arabidopsis thaliana protein match is: Eukaryotic protein of unknown function (DUF842) (TAIR:AT2G31725.1)	Protein of unknown function DUF842, eukaryotic	NO
AT1G05820	-0.736096	1.03707	0.00189858	0.016193	DOWN		SIGNAL PEPTIDE PEPTIDASE-LIKE 5	SIGNAL PEPTIDE PEPTIDASE-LIKE 5 (SPPL5); FUNCTIONS IN: peptidase activity, aspartic-type endopeptidase activity; INVOLVED IN: proteolysis; LOCATED IN: endomembrane system, integral to membrane; CONTAINS InterPro DOMAIN/s: Protease-associated PA (InterPro:IPR003137), Peptidase A22, presenilin signal peptide (InterPro:IPR006639), Peptidase A22B, signal peptide peptidase (InterPro:IPR007369); BEST A…	Peptidase A22B, signal peptide peptidase | Presenilin/signal peptide peptidase | Protease-associated domain, PA	NO
AT1G05900	-0.341871	4.59516	0.00186769	0.0159781	DOWN		endonuclease III 2	endonuclease III 2 (NTH2); CONTAINS InterPro DOMAIN/s: DNA glycosylase (InterPro:IPR011257), Helix-hairpin-helix DNA-binding motif, class 1 (InterPro:IPR003583), Endonuclease III, conserved site-2 (InterPro:IPR004036), Helix-hairpin-helix motif (InterPro:IPR000445), HhH-GPD domain (InterPro:IPR003265); CONTAINS InterPro DOMAIN/s: DNA glycosylase (InterPro:IPR011257), Helix-hairpin-helix DNA-bindi…	DNA glycosylase | Endonuclease III-like, conserved site-2 | Endonuclease III-like, iron-sulphur cluster loop motif | Helix-hairpin-helix DNA-binding motif, class 1 | Helix-hairpin-helix motif | Helix-turn-helix, base-excision DNA repair, C-terminal | HhH-GPD domain	NO
AT1G05940	-0.745889	5.25548	1.84514e-13	2.63331e-11	DOWN		cationic amino acid transporter 9	cationic amino acid transporter 9 (CAT9); FUNCTIONS IN: cationic amino acid transmembrane transporter activity; INVOLVED IN: amino acid transport, transport, transmembrane transport; LOCATED IN: plasma membrane; EXPRESSED IN: 25 plant structures; EXPRESSED DURING: 15 growth stages; CONTAINS InterPro DOMAIN/s: Cationic amino acid transporter (InterPro:IPR015606), Amino acid/polyamine transporter I…	Amino acid/polyamine transporter I | Cationic amino acid transporter, C-terminal	NO
AT1G06120	-1.81854	-0.552045	1.37603e-05	0.000275051	DOWN		Fatty acid desaturase family protein	Fatty acid desaturase family protein; FUNCTIONS IN: oxidoreductase activity, oxidoreductase activity, acting on paired donors, with oxidation of a pair of donors resulting in the reduction of molecular oxygen to two molecules of water; INVOLVED IN: oxidation reduction, lipid metabolic process; CONTAINS InterPro DOMAIN/s: Fatty acid desaturase, type 1, core (InterPro:IPR015876), Fatty acid desatur…	Fatty acid desaturase, type 1 | Fatty acid desaturase, type 1, core	NO
AT1G06140	0.872133	0.474213	0.000129048	0.00179015	UP		Pentatricopeptide repeat (PPR) superfamily protein	Pentatricopeptide repeat (PPR) superfamily protein; CONTAINS InterPro DOMAIN/s: Pentatricopeptide repeat (InterPro:IPR002885); BEST Arabidopsis thaliana protein match is: Tetratricopeptide repeat (TPR)-like superfamily protein (TAIR:AT4G33990.1)	Pentatricopeptide repeat | Tetratricopeptide-like helical domain	NO
AT1G06190	0.272932	6.28123	0.00421481	0.0305967	UP		Rho termination factor	Rho termination factor; FUNCTIONS IN: ATPase activity, coupled to transmembrane movement of ions, phosphorylative mechanism, ATP binding; FUNCTIONS IN: transcription termination factor activity, ATPase activity, coupled to transmembrane movement of ions, phosphorylative mechanism, ATP binding; INVOLVED IN: ATP biosynthetic process; INVOLVED IN: transcription termination, ATP biosynthetic process;…	Rho termination factor, N-terminal	NO
AT1G06200	0.272414	5.82134	0.0042189	0.0306111	UP		Peptidase S24/S26A/S26B/S26C family protein	Peptidase S24/S26A/S26B/S26C family protein; CONTAINS InterPro DOMAIN/s: Peptidase S24/S26A/S26B/S26C, beta-ribbon domain (InterPro:IPR011056), Peptidase S24/S26A/S26B/S26C (InterPro:IPR015927); BEST Arabidopsis thaliana protein match is: Peptidase S24/S26A/S26B/S26C family protein (TAIR:AT2G31140.1)		NO
AT1G06220	0.344566	5.99093	0.000185171	0.00240894	UP	YES	Ribosomal protein S5/Elongation factor G/III/V family protein	MATERNAL EFFECT EMBRYO ARREST 5 (MEE5); FUNCTIONS IN: translation factor activity, nucleic acid binding, GTP binding, translation elongation factor activity, GTPase activity; INVOLVED IN: regulation of embryo sac egg cell differentiation, embryo development ending in seed dormancy; LOCATED IN: nuclear speck, cell wall, plasma membrane; EXPRESSED IN: whole plant, cultured cell; CONTAINS InterPro D…	Elongation factor G, III-V domain | Elongation factor, GTP-binding domain | P-loop containing nucleoside triphosphate hydrolase | Ribosomal protein S5 domain 2-type fold | Ribosomal protein S5 domain 2-type fold, subgroup | Small GTP-binding protein domain | Translation elongation factor EFG, V domain | Translation elongation factor EFG/EF2, domain IV | Translation elongation factor EFTu/EF1A, do…	NO
AT1G06270	0.608543	2.21376	0.000669361	0.00696041	UP		Pentatricopeptide repeat (PPR) superfamily protein	Pentatricopeptide repeat (PPR) superfamily protein; CONTAINS InterPro DOMAIN/s: Pentatricopeptide repeat (InterPro:IPR002885); BEST Arabidopsis thaliana protein match is: rna processing factor 2 (TAIR:AT1G62670.1)	Pentatricopeptide repeat	NO
AT1G06360	1.15057	5.63056	2.27435e-18	6.38353e-16	UP		Fatty acid desaturase family protein	Fatty acid desaturase family protein; FUNCTIONS IN: oxidoreductase activity, oxidoreductase activity, acting on paired donors, with oxidation of a pair of donors resulting in the reduction of molecular oxygen to two molecules of water; INVOLVED IN: oxidation reduction, lipid metabolic process; CONTAINS InterPro DOMAIN/s: Fatty acid desaturase, type 1, core (InterPro:IPR015876), Fatty acid desatur…	Fatty acid desaturase, type 1 | Fatty acid desaturase, type 1, core	NO
AT1G06380	0.53135	2.63731	0.000944927	0.00923129	UP		Ribosomal protein L1p/L10e family	Ribosomal protein L1p/L10e family; FUNCTIONS IN: RNA binding; INVOLVED IN: RNA processing; LOCATED IN: chloroplast, chloroplast envelope; EXPRESSED IN: 22 plant structures; EXPRESSED DURING: 13 growth stages; CONTAINS InterPro DOMAIN/s: Ribosomal protein L1 (InterPro:IPR002143); BEST Arabidopsis thaliana protein match is: Ribosomal protein L1p/L10e family (TAIR:AT2G42650.1)	Ribosomal protein L1, 2-layer alpha/beta-sandwich | Ribosomal protein L1-like | Ribosomal protein L1/ribosomal biogenesis protein	NO
AT1G06390	0.265987	6.22446	0.00579931	0.0394519	UP		GSK3/SHAGGY-like protein kinase 1	GSK3/SHAGGY-like protein kinase 1 (GSK1); FUNCTIONS IN: kinase activity, glycogen synthase kinase 3 activity; INVOLVED IN: brassinosteroid mediated signaling pathway, protein amino acid phosphorylation, hyperosmotic salinity response, regulation of protein localization; LOCATED IN: cytosol, plasma membrane; EXPRESSED IN: 24 plant structures; EXPRESSED DURING: 13 growth stages; CONTAINS InterPro D…	Protein kinase domain | Protein kinase, ATP binding site | Protein kinase-like domain | Serine/threonine-protein kinase, active site | Serine/threonine/dual specificity protein kinase, catalytic domain	NO
AT1G06420	0.907698	-0.352212	0.00603766	0.0407606	UP			unknown protein; FUNCTIONS IN: molecular_function unknown; INVOLVED IN: biological_process unknown; LOCATED IN: cellular_component unknown; EXPRESSED IN: 14 plant structures; EXPRESSED DURING: 6 growth stages		NO
AT1G06440	0.744589	1.12227	0.000493791	0.00544042	UP		Ubiquitin carboxyl-terminal hydrolase family protein	Ubiquitin carboxyl-terminal hydrolase family protein; LOCATED IN: mitochondrion; EXPRESSED IN: shoot apex, root; CONTAINS InterPro DOMAIN/s: RNA recognition domain, plant (InterPro:IPR021099); BEST Arabidopsis thaliana protein match is: Ubiquitin carboxyl-terminal hydrolase family protein (TAIR:AT4G33495.1)	Plant organelle RNA recognition domain	NO
AT1G06450	0.629748	2.25779	0.000713957	0.00732781	UP		Polynucleotidyl transferase, ribonuclease H-like superfamily protein	Polynucleotidyl transferase, ribonuclease H-like superfamily protein; FUNCTIONS IN: ribonuclease activity, nucleic acid binding; INVOLVED IN: RNA modification; LOCATED IN: nucleus; EXPRESSED IN: 24 plant structures; EXPRESSED DURING: 14 growth stages; CONTAINS InterPro DOMAIN/s: Ribonuclease CAF1 (InterPro:IPR006941), Polynucleotidyl transferase, ribonuclease H fold (InterPro:IPR012337); BEST Ara…	Ribonuclease CAF1 | Ribonuclease H-like domain	NO
AT1G06460	-0.326591	6.61407	0.000646242	0.00675755	DOWN		alpha-crystallin domain 32.1	alpha-crystallin domain 32.1 (ACD32.1); INVOLVED IN: response to heat; LOCATED IN: peroxisome; EXPRESSED IN: 23 plant structures; EXPRESSED DURING: 15 growth stages; CONTAINS InterPro DOMAIN/s: Heat shock protein Hsp20 (InterPro:IPR002068), HSP20-like chaperone (InterPro:IPR008978); BEST Arabidopsis thaliana protein match is: heat shock protein 17.6A (TAIR:AT5G12030.1)	Alpha crystallin/Hsp20 domain | HSP20-like chaperone	NO
AT1G06470	-0.386795	4.17639	0.00197246	0.0167046	DOWN		Nucleotide/sugar transporter family protein	Nucleotide/sugar transporter family protein; CONTAINS InterPro DOMAIN/s: Protein of unknown function DUF6, transmembrane (InterPro:IPR000620), Protein of unknown function DUF250 (InterPro:IPR004853); BEST Arabidopsis thaliana protein match is: Nucleotide-sugar transporter family protein (TAIR:AT5G25400.1)	Drug/metabolite transporter | Triose-phosphate transporter domain	NO
AT1G06530	0.394853	5.66673	0.000163752	0.00217911	UP		Tropomyosin-related	Tropomyosin-related; LOCATED IN: mitochondrion, plasma membrane, plastid; EXPRESSED IN: 25 plant structures; EXPRESSED DURING: 14 growth stages; BEST Arabidopsis thaliana protein match is: Tropomyosin-related (TAIR:AT3G58840.2)		NO
AT1G06550	0.353464	5.20592	0.00390494	0.0288489	UP		ATP-dependent caseinolytic (Clp) protease/crotonase family protein	ATP-dependent caseinolytic (Clp) protease/crotonase family protein; FUNCTIONS IN: 3-hydroxyisobutyryl-CoA hydrolase activity, catalytic activity; INVOLVED IN: response to karrikin, fatty acid beta-oxidation; LOCATED IN: cellular_component unknown; EXPRESSED IN: 23 plant structures; EXPRESSED DURING: 13 growth stages; CONTAINS InterPro DOMAIN/s: Crotonase, core (InterPro:IPR001753); BEST Arabidops…	ClpP/crotonase-like domain	NO
AT1G06560	0.809141	3.51409	6.76265e-08	2.87592e-06	UP		NOL1/NOP2/sun family protein	NOL1/NOP2/sun family protein; FUNCTIONS IN: methyltransferase activity, RNA binding; INVOLVED IN: biological_process unknown; LOCATED IN: cellular_component unknown; EXPRESSED IN: 23 plant structures; EXPRESSED DURING: 13 growth stages; CONTAINS InterPro DOMAIN/s: Bacterial Fmu (Sun)/eukaryotic nucleolar NOL1/Nop2p (InterPro:IPR001678), Pseudouridine synthase/archaeosine transglycosylase-like (In…	Bacterial Fmu (Sun)/eukaryotic nucleolar NOL1/Nop2p | Bacterial Fmu (Sun)/eukaryotic nucleolar NOL1/Nop2p, conserved site | PUA domain | PUA-like domain | RNA (C5-cytosine) methyltransferase | S-adenosyl-L-methionine-dependent methyltransferase-like	NO
AT1G06590	0.565251	3.47032	6.62536e-05	0.00103071	UP			unknown protein	Apc5/TPR19 domain | Tetratricopeptide-like helical domain	NO
AT1G06630	0.394581	4.48624	0.000496763	0.00546385	UP		F-box/RNI-like superfamily protein	F-box/RNI-like superfamily protein; FUNCTIONS IN: molecular_function unknown; INVOLVED IN: biological_process unknown; LOCATED IN: cellular_component unknown; EXPRESSED IN: 24 plant structures; EXPRESSED DURING: 13 growth stages; CONTAINS InterPro DOMAIN/s: F-box domain, cyclin-like (InterPro:IPR001810), F-box domain, Skp2-like (InterPro:IPR022364); BEST Arabidopsis thaliana protein match is: F-b…	F-box domain	NO
AT1G06670	0.32204	5.2674	0.00181537	0.0155978	UP		nuclear DEIH-boxhelicase	nuclear DEIH-boxhelicase (NIH); CONTAINS InterPro DOMAIN/s: Helicase-associated domain (InterPro:IPR007502), DNA/RNA helicase, DEAD/DEAH box type, N-terminal (InterPro:IPR011545), Ankyrin repeat-containing domain (InterPro:IPR020683), DEAD-like helicase, N-terminal (InterPro:IPR014001), DNA/RNA helicase, C-terminal (InterPro:IPR001650), Single-stranded nucleic acid binding R3H (InterPro:IPR001374…		NO
AT1G06720	0.709796	4.18465	8.03055e-08	3.31467e-06	UP		P-loop containing nucleoside triphosphate hydrolases superfamily protein	P-loop containing nucleoside triphosphate hydrolases superfamily protein; FUNCTIONS IN: GTP binding, GTPase activity; INVOLVED IN: ribosome biogenesis; LOCATED IN: nucleus; EXPRESSED IN: 21 plant structures; EXPRESSED DURING: 13 growth stages; CONTAINS InterPro DOMAIN/s: AARP2CN (InterPro:IPR012948), Protein synthesis factor, GTP-binding (InterPro:IPR000795), Protein of unknown function DUF663 (I…	AARP2CN | Elongation factor, GTP-binding domain | P-loop containing nucleoside triphosphate hydrolase | Ribosome biogenesis protein BMS1/TSR1, C-terminal	NO
AT1G06740	0.701281	2.38361	0.000321607	0.00383947	UP		transposable element gene	Mutator-like transposase family, has a 2.7e-53 P-value blast match to GB:AAA21566 mudrA of transposon="MuDR" (MuDr-element) (Zea mays)	MULE transposase domain | Transposase, MuDR, plant | Zinc finger, CCHC-type | Zinc finger, PMZ-type | Zinc finger, SWIM-type	NO
AT1G06760	-0.297952	7.36976	0.00593616	0.0401962	DOWN		winged-helix DNA-binding transcription factor family protein	winged-helix DNA-binding transcription factor family protein; FUNCTIONS IN: DNA binding; INVOLVED IN: nucleosome assembly; LOCATED IN: nucleus, nucleosome; EXPRESSED IN: 23 plant structures; EXPRESSED DURING: 13 growth stages; CONTAINS InterPro DOMAIN/s: Winged helix-turn-helix transcription repressor DNA-binding (InterPro:IPR011991), Histone H5 (InterPro:IPR005819), Histone H1/H5 (InterPro:IPR00…	Histone H5 | Linker histone H1/H5, domain H15 | Winged helix-turn-helix DNA-binding domain	NO
AT1G06890	0.380214	5.41258	0.000312327	0.00374626	UP		nodulin MtN21 /EamA-like transporter family protein	nodulin MtN21 /EamA-like transporter family protein; CONTAINS InterPro DOMAIN/s: Protein of unknown function DUF250 (InterPro:IPR004853); BEST Arabidopsis thaliana protein match is: Nucleotide/sugar transporter family protein (TAIR:AT2G30460.2)	Triose-phosphate transporter domain	NO
AT1G06900	0.411891	5.67899	0.000121232	0.00170346	UP		Insulinase (Peptidase family M16) family protein	Insulinase (Peptidase family M16) family protein; FUNCTIONS IN: metalloendopeptidase activity, catalytic activity, zinc ion binding, metal ion binding; INVOLVED IN: proteolysis; LOCATED IN: cellular_component unknown; EXPRESSED IN: 23 plant structures; EXPRESSED DURING: 13 growth stages; CONTAINS InterPro DOMAIN/s: Peptidase M16, zinc-binding site (InterPro:IPR001431), Peptidase M16, C-terminal (…	Metalloenzyme, LuxS/M16 peptidase-like | Peptidase M16 domain | Peptidase M16, C-terminal domain | Peptidase M16, N-terminal | Peptidase M16, zinc-binding site	NO
AT1G06950	0.317794	7.33634	0.00114332	0.0108017	UP		translocon at the inner envelope membrane of chloroplasts 110	translocon at the inner envelope membrane of chloroplasts 110 (TIC110); INVOLVED IN: protein import into chloroplast stroma, chloroplast organization; LOCATED IN: chloroplast, membrane, chloroplast envelope, Tic complex; EXPRESSED IN: 23 plant structures; EXPRESSED DURING: 14 growth stages		NO
AT1G06960	0.427055	4.13137	0.00109978	0.0104519	UP		RNA-binding (RRM/RBD/RNP motifs) family protein	RNA-binding (RRM/RBD/RNP motifs) family protein; FUNCTIONS IN: RNA binding, nucleotide binding, nucleic acid binding; EXPRESSED IN: 20 plant structures; EXPRESSED DURING: 12 growth stages; CONTAINS InterPro DOMAIN/s: RNA recognition motif, RNP-1 (InterPro:IPR000504), Nucleotide-binding, alpha-beta plait (InterPro:IPR012677); BEST Arabidopsis thaliana protein match is: U2 small nuclear ribonucleop…	Nucleotide-binding, alpha-beta plait | RNA recognition motif domain | U1 small nuclear ribonucleoprotein A/U2 small nuclear ribonucleoprotein B''	NO
AT1G07010	-0.521736	6.68352	5.03612e-07	1.65162e-05	DOWN		Calcineurin-like metallo-phosphoesterase superfamily protein	Calcineurin-like metallo-phosphoesterase superfamily protein; BEST Arabidopsis thaliana protein match is: Calcineurin-like metallo-phosphoesterase superfamily protein (TAIR:AT1G18480.1); FUNCTIONS IN: hydrolase activity, protein serine/threonine phosphatase activity; INVOLVED IN: biological_process unknown; EXPRESSED IN: 21 plant structures; LOCATED IN: peroxisome; EXPRESSED DURING: 13 growth sta…	Calcineurin-like phosphoesterase domain, apaH type | Metallo-dependent phosphatase-like	NO
AT1G07020	0.485194	3.2915	0.000445389	0.00499202	UP			unknown protein		NO
AT1G07070	0.470128	3.07891	0.00119632	0.0111678	UP		Ribosomal protein L35Ae family protein	Ribosomal protein L35Ae family protein; FUNCTIONS IN: structural constituent of ribosome; INVOLVED IN: translation, ribosome biogenesis; LOCATED IN: ribosome, cytosolic large ribosomal subunit; EXPRESSED IN: 22 plant structures; EXPRESSED DURING: 13 growth stages; CONTAINS InterPro DOMAIN/s: Ribosomal protein L35Ae (InterPro:IPR001780), Ribosomal protein L35Ae, conserved site (InterPro:IPR018266)…	Ribosomal protein L35A | Ribosomal protein L35Ae, conserved site | Translation protein, beta-barrel domain	NO
AT1G07110	-0.404207	7.03434	1.93194e-05	0.000366589	DOWN		fructose-2,6-bisphosphatase	fructose-2,6-bisphosphatase (F2KP); FUNCTIONS IN: fructose-2,6-bisphosphate 2-phosphatase activity; INVOLVED IN: N-terminal protein myristoylation, fructose metabolic process; LOCATED IN: cytosol, plasma membrane; EXPRESSED IN: 24 plant structures; EXPRESSED DURING: 14 growth stages; CONTAINS InterPro DOMAIN/s: Bifunctional 6-phosphofructo-2-kinase/fructose-2, 6-bisphosphate 2-phosphatase (InterP…	6-phosphofructo-2-kinase | Bifunctional 6-phosphofructo-2-kinase/fructose-2, 6-bisphosphate 2-phosphatase | Carbohydrate binding module family 20 | Carbohydrate-binding-like fold | Fructose-2,6-bisphosphatase | Histidine phosphatase superfamily | Histidine phosphatase superfamily, clade-1 | Immunoglobulin-like fold | P-loop containing nucleoside triphosphate hydrolase | Phosphoglycerate/bisphosph…	NO
AT1G07140	0.312245	6.61359	0.000817166	0.0081938	UP		Pleckstrin homology (PH) domain superfamily protein	SIRANBP; FUNCTIONS IN: Ran GTPase binding; INVOLVED IN: intracellular transport, protein import into nucleus, translocation; LOCATED IN: cellular_component unknown; EXPRESSED IN: 23 plant structures; EXPRESSED DURING: 16 growth stages; CONTAINS InterPro DOMAIN/s: Ran binding protein 1 (InterPro:IPR000156), Pleckstrin homology-type (InterPro:IPR011993); BEST Arabidopsis thaliana protein match is: …	Pleckstrin homology-like domain | Ran binding domain	NO
AT1G07170	0.474094	4.02147	0.000592565	0.00630989	UP	YES	PHF5-like protein	PHF5-like protein; LOCATED IN: cellular_component unknown; EXPRESSED IN: 24 plant structures; EXPRESSED DURING: 15 growth stages; CONTAINS InterPro DOMAIN/s: PHF5-like (InterPro:IPR005345); BEST Arabidopsis thaliana protein match is: PHF5-like protein (TAIR:AT2G30000.1)	PHF5-like	NO
AT1G07180	-0.57986	6.75433	3.18898e-06	7.93944e-05	DOWN		alternative NAD(P)H dehydrogenase 1	alternative NAD(P)H dehydrogenase 1 (NDA1); FUNCTIONS IN: NADH dehydrogenase activity; INVOLVED IN: oxidation reduction; LOCATED IN: intrinsic to mitochondrial inner membrane, mitochondrion; EXPRESSED IN: 20 plant structures; EXPRESSED DURING: 10 growth stages; CONTAINS InterPro DOMAIN/s: FAD-dependent pyridine nucleotide-disulphide oxidoreductase (InterPro:IPR013027), Pyridine nucleotide-disulph…	FAD-dependent pyridine nucleotide-disulphide oxidoreductase | Pyridine nucleotide-disulphide oxidoreductase, FAD/NAD(P)-binding domain | Pyridine nucleotide-disulphide oxidoreductase, NAD-binding domain	NO
AT1G07200	0.380121	5.07233	0.00116642	0.0109494	UP		Double Clp-N motif-containing P-loop nucleoside triphosphate hydrolases superfamily protein	Double Clp-N motif-containing P-loop nucleoside triphosphate hydrolases superfamily protein; FUNCTIONS IN: ATP binding; INVOLVED IN: biological_process unknown; LOCATED IN: cellular_component unknown; BEST Arabidopsis thaliana protein match is: Double Clp-N motif-containing P-loop nucleoside triphosphate hydrolases superfamily protein (TAIR:AT2G29970.1)	Double Clp-N motif | P-loop containing nucleoside triphosphate hydrolase	NO
AT1G07210	0.447922	4.62477	8.52548e-05	0.00127	UP		Ribosomal protein S18	Ribosomal protein S18; FUNCTIONS IN: structural constituent of ribosome; INVOLVED IN: translation; LOCATED IN: ribosome, intracellular; EXPRESSED IN: 24 plant structures; EXPRESSED DURING: 15 growth stages; CONTAINS InterPro DOMAIN/s: Ribosomal protein S18 (InterPro:IPR001648)	Ribosomal protein S18	NO
AT1G07230	0.338462	6.01794	0.000527304	0.00573462	UP		non-specific phospholipase C1	non-specific phospholipase C1 (NPC1); FUNCTIONS IN: hydrolase activity, acting on ester bonds; LOCATED IN: endomembrane system; EXPRESSED IN: 23 plant structures; EXPRESSED DURING: 13 growth stages; CONTAINS InterPro DOMAIN/s: Phosphoesterase (InterPro:IPR007312); BEST Arabidopsis thaliana protein match is: non-specific phospholipase C2 (TAIR:AT2G26870.1)	Phosphoesterase	NO
AT1G07300	1.06215	1.84096	1.78937e-05	0.00034321	UP		josephin protein-related	josephin protein-related; BEST Arabidopsis thaliana protein match is: JOSEPHIN-like protein (TAIR:AT2G29640.1)		NO
AT1G07330	-2.23582	-2.63633	0.00510372	0.0356667	DOWN			unknown protein; BEST Arabidopsis thaliana protein match is: unknown protein (TAIR:AT2G29620.1)		NO
AT1G07350	-0.354726	5.48203	0.00189712	0.0161929	DOWN		RNA-binding (RRM/RBD/RNP motifs) family protein	RNA-binding (RRM/RBD/RNP motifs) family protein; FUNCTIONS IN: RNA binding, nucleotide binding, nucleic acid binding; INVOLVED IN: RNA splicing; EXPRESSED IN: 26 plant structures; EXPRESSED DURING: 15 growth stages; CONTAINS InterPro DOMAIN/s: RNA recognition motif, RNP-1 (InterPro:IPR000504), Nucleotide-binding, alpha-beta plait (InterPro:IPR012677); BEST Arabidopsis thaliana protein match is: R…	Nucleotide-binding, alpha-beta plait | RNA recognition motif domain	NO
AT1G07370	0.992292	2.29357	2.37055e-09	1.49518e-07	UP		proliferating cellular nuclear antigen 1	proliferating cellular nuclear antigen 1 (PCNA1); CONTAINS InterPro DOMAIN/s: Proliferating cell nuclear antigen, PCNA (InterPro:IPR000730), Proliferating cell nuclear antigen, PCNA, C-terminal (InterPro:IPR022649), Proliferating cell nuclear antigen, PCNA, conserved site (InterPro:IPR022659), Proliferating cell nuclear antigen, PCNA, N-terminal (InterPro:IPR022648); BEST Arabidopsis thaliana pro…	Proliferating cell nuclear antigen, PCNA | Proliferating cell nuclear antigen, PCNA, C-terminal | Proliferating cell nuclear antigen, PCNA, N-terminal | Proliferating cell nuclear antigen, PCNA, conserved site	NO
AT1G07450	-0.83364	1.53235	0.00299974	0.0233713	DOWN		NAD(P)-binding Rossmann-fold superfamily protein	NAD(P)-binding Rossmann-fold superfamily protein; FUNCTIONS IN: oxidoreductase activity, binding, catalytic activity; INVOLVED IN: oxidation reduction, metabolic process; EXPRESSED IN: 20 plant structures; EXPRESSED DURING: 10 growth stages; CONTAINS InterPro DOMAIN/s: Short-chain dehydrogenase/reductase, conserved site (InterPro:IPR020904), NAD(P)-binding domain (InterPro:IPR016040), Glucose/rib…	Glucose/ribitol dehydrogenase | NAD(P)-binding domain | Short-chain dehydrogenase/reductase SDR | Short-chain dehydrogenase/reductase, conserved site	NO
AT1G07520	0.524176	3.77318	0.000751895	0.0076625	UP		GRAS family transcription factor	GRAS family transcription factor; CONTAINS InterPro DOMAIN/s: Transcription factor GRAS (InterPro:IPR005202); BEST Arabidopsis thaliana protein match is: GRAS family transcription factor (TAIR:AT2G29065.1)	Transcription factor GRAS	NO
AT1G07550	-2.83974	-1.43638	5.90713e-07	1.9002e-05	DOWN		Leucine-rich repeat protein kinase family protein	Leucine-rich repeat protein kinase family protein; FUNCTIONS IN: kinase activity; INVOLVED IN: protein amino acid phosphorylation; LOCATED IN: endomembrane system; EXPRESSED IN: root, leaf; EXPRESSED DURING: LP.08 eight leaves visible; CONTAINS InterPro DOMAIN/s: Protein kinase, ATP binding site (InterPro:IPR017441), Protein kinase, catalytic domain (InterPro:IPR000719), Leucine-rich repeat (Inte…	Concanavalin A-like lectin/glucanase, subgroup | Leucine-rich repeat | Malectin-like carbohydrate-binding domain | Protein kinase domain | Protein kinase, ATP binding site | Protein kinase-like domain | Serine/threonine-protein kinase, active site	NO
AT1G07600	-0.70204	2.34544	0.000168894	0.00223517	DOWN		metallothionein 1A	metallothionein 1A (MT1A); BEST Arabidopsis thaliana protein match is: metallothionein 1C (TAIR:AT1G07610.1)		NO
AT1G07615	0.592146	3.08863	0.000633001	0.00665007	UP		GTP-binding protein Obg/CgtA	GTP-binding protein Obg/CgtA; FUNCTIONS IN: magnesium ion binding, GTP binding, GTPase activity; LOCATED IN: intracellular; EXPRESSED IN: 14 plant structures; EXPRESSED DURING: 6 growth stages; CONTAINS InterPro DOMAIN/s: GTP1/OBG subdomain (InterPro:IPR006169), GTP1/OBG (InterPro:IPR006073), GTP-binding protein, HSR1-related (InterPro:IPR002917), GTP-binding protein Obg/CgtA (InterPro:IPR014100)…	GTP binding domain | GTP-binding protein Obg/CgtA | GTP1/OBG domain | P-loop containing nucleoside triphosphate hydrolase	NO
AT1G07650	-0.663008	5.16589	1.60818e-09	1.06624e-07	DOWN		Leucine-rich repeat transmembrane protein kinase	Leucine-rich repeat transmembrane protein kinase; FUNCTIONS IN: protein serine/threonine kinase activity, kinase activity, ATP binding; INVOLVED IN: protein amino acid phosphorylation, transmembrane receptor protein tyrosine kinase signaling pathway; INVOLVED IN: transmembrane receptor protein tyrosine kinase signaling pathway, protein amino acid phosphorylation; LOCATED IN: endomembrane system; …	Concanavalin A-like lectin/glucanase, subgroup | Leucine-rich repeat | Malectin | Protein kinase domain | Protein kinase, ATP binding site | Protein kinase-like domain | Serine-threonine/tyrosine-protein kinase catalytic domain | Serine/threonine-protein kinase, active site	NO
AT1G07700	-0.256062	5.92654	0.00679164	0.0446079	DOWN		Thioredoxin superfamily protein	Thioredoxin superfamily protein; INVOLVED IN: cell redox homeostasis; LOCATED IN: chloroplast; LOCATED IN: chloroplast stroma, chloroplast; EXPRESSED IN: 24 plant structures; EXPRESSED DURING: 15 growth stages; CONTAINS InterPro DOMAIN/s: Thioredoxin fold (InterPro:IPR012335), Thioredoxin, core (InterPro:IPR015467), Thioredoxin domain (InterPro:IPR013766), Thioredoxin-like fold (InterPro:IPR01233…	Thioredoxin | Thioredoxin domain | Thioredoxin-like fold	NO
AT1G07720	-0.446384	5.71996	0.00461734	0.0329225	DOWN		3-ketoacyl-CoA synthase 3	3-ketoacyl-CoA synthase 3 (KCS3); FUNCTIONS IN: transferase activity, transferring acyl groups other than amino-acyl groups, catalytic activity, acyltransferase activity; INVOLVED IN: response to cold, response to light stimulus, response to osmotic stress; LOCATED IN: endoplasmic reticulum; EXPRESSED IN: 24 plant structures; EXPRESSED DURING: 13 growth stages; CONTAINS InterPro DOMAIN/s: Thiolas…		NO
AT1G07745	0.493482	3.31885	0.000559739	0.00602511	UP		homolog of RAD51 D	homolog of RAD51 D (RAD51D); FUNCTIONS IN: DNA-dependent ATPase activity, DNA binding, ATP binding; FUNCTIONS IN: nucleoside-triphosphatase activity, DNA-dependent ATPase activity, DNA binding, nucleotide binding, ATP binding; INVOLVED IN: DNA repair, somatic cell DNA recombination, regulation of response to biotic stimulus; LOCATED IN: endomembrane system; EXPRESSED IN: sperm cell, male gametoph…	AAA+ ATPase domain | DNA recombination and repair protein Rad51, C-terminal | DNA recombination and repair protein RecA-like, ATP-binding domain | P-loop containing nucleoside triphosphate hydrolase	NO
AT1G07790	0.456286	4.63509	0.000244043	0.00303531	UP		Histone superfamily protein	HTB1; FUNCTIONS IN: DNA binding; INVOLVED IN: nucleosome assembly; LOCATED IN: chloroplast; EXPRESSED IN: 23 plant structures; EXPRESSED DURING: 13 growth stages; CONTAINS InterPro DOMAIN/s: Histone H2B (InterPro:IPR000558), Histone-fold (InterPro:IPR009072), Histone core (InterPro:IPR007125); BEST Arabidopsis thaliana protein match is: Histone superfamily protein (TAIR:AT3G45980.1)	Histone H2B | Histone core | Histone-fold	NO
AT1G07810	0.265681	5.88637	0.00451602	0.0323476	UP		ER-type Ca2+-ATPase 1	ER-type Ca2+-ATPase 1 (ECA1); FUNCTIONS IN: calcium-transporting ATPase activity; INVOLVED IN: manganese ion transport, response to cadmium ion, cellular manganese ion homeostasis, calcium ion transport, response to manganese ion; LOCATED IN: endoplasmic reticulum, plasma membrane, endoplasmic reticulum membrane; EXPRESSED IN: guard cell, callus, cultured cell; CONTAINS InterPro DOMAIN/s: ATPase,…	Cation-transporting P-type ATPase | Cation-transporting P-type ATPase, C-terminal | Cation-transporting P-type ATPase, N-terminal | HAD-like domain | P-type ATPase, transmembrane domain | P-type ATPase, A domain | P-type ATPase, cytoplasmic domain N | P-type ATPase, phosphorylation site	NO
AT1G07820	0.655548	6.13024	6.74746e-08	2.87309e-06	UP		Histone superfamily protein	Histone superfamily protein; FUNCTIONS IN: DNA binding; INVOLVED IN: nucleosome assembly; LOCATED IN: nucleus, nucleosome; CONTAINS InterPro DOMAIN/s: Histone H4, conserved site (InterPro:IPR019809), Histone-fold (InterPro:IPR009072), Histone core (InterPro:IPR007125), Histone H4 (InterPro:IPR001951); CONTAINS InterPro DOMAIN/s: Histone-fold (InterPro:IPR009072), Histone H4, conserved site (Inter…	Histone H4 | Histone H4, conserved site | Histone core | Histone-fold	NO
AT1G07890	-0.486459	8.68729	0.000120037	0.00168949	DOWN		ascorbate peroxidase 1	ascorbate peroxidase 1 (APX1); FUNCTIONS IN: L-ascorbate peroxidase activity; INVOLVED IN: in 6 processes; INVOLVED IN: response to reactive oxygen species, response to salt stress, response to heat, hydrogen peroxide catabolic process, embryo development ending in seed dormancy; LOCATED IN: cytosol, cell wall, chloroplast, plasma membrane; LOCATED IN: cytosol, cell wall, chloroplast, plasma memb…	Haem peroxidase | Haem peroxidase, plant/fungal/bacterial | Peroxidase, active site | Peroxidases heam-ligand binding site | Plant ascorbate peroxidase	NO
AT1G07900	1.3862	0.00065653	0.00351303	0.0265654	UP		LOB domain-containing protein 1	LOB domain-containing protein 1 (LBD1); CONTAINS InterPro DOMAIN/s: Lateral organ boundaries, LOB (InterPro:IPR004883); BEST Arabidopsis thaliana protein match is: LOB domain-containing protein 11 (TAIR:AT2G28500.1)		NO
AT1G07902	-1.03313	-0.939719	0.00552822	0.0380457	DOWN					NO
AT1G07930	0.371667	8.31051	6.39509e-05	0.00100136	UP		GTP binding Elongation factor Tu family protein	GTP binding Elongation factor Tu family protein; FUNCTIONS IN: calmodulin binding, translation elongation factor activity; INVOLVED IN: translational elongation; LOCATED IN: mitochondrion; LOCATED IN: mitochondrion, vacuole; EXPRESSED IN: cotyledon, male gametophyte, guard cell; EXPRESSED IN: cotyledon, male gametophyte, guard cell, juvenile leaf, leaf; CONTAINS InterPro DOMAIN/s: Translation elo…	Elongation factor, GTP-binding domain | P-loop containing nucleoside triphosphate hydrolase | Translation elongation factor EF1A, eukaryotic/archaeal | Translation elongation factor EF1A/initiation factor IF2gamma, C-terminal | Translation elongation factor EFTu/EF1A, C-terminal | Translation elongation factor EFTu/EF1A, domain 2 | Translation protein, beta-barrel domain	NO
AT1G07960	0.345776	4.60176	0.00190516	0.0162409	UP		PDI-like 5-1	PDI-like 5-1 (PDIL5-1); INVOLVED IN: cell redox homeostasis; LOCATED IN: endomembrane system; EXPRESSED IN: 24 plant structures; EXPRESSED DURING: 15 growth stages; CONTAINS InterPro DOMAIN/s: Thioredoxin fold (InterPro:IPR012335), Thioredoxin-like (InterPro:IPR017936), Thioredoxin domain (InterPro:IPR013766), Thioredoxin-like fold (InterPro:IPR012336); BEST Arabidopsis thaliana protein match is:…	Thioredoxin domain | Thioredoxin-like fold	NO
AT1G07970	0.511133	4.10407	2.02711e-05	0.000381637	UP			CONTAINS InterPro DOMAIN/s: Cytochrome B561-related, N-terminal (InterPro:IPR019176)	Cytochrome B561-related	NO
AT1G07985	1.75719	3.9551	1.88178e-09	1.22592e-07	UP		Expressed protein	Expressed protein; FUNCTIONS IN: molecular_function unknown; INVOLVED IN: biological_process unknown; LOCATED IN: chloroplast		NO
AT1G08070	0.880015	1.1927	5.28487e-05	0.000860318	UP		Tetratricopeptide repeat (TPR)-like superfamily protein	ORGANELLE TRANSCRIPT PROCESSING 82 (OTP82); CONTAINS InterPro DOMAIN/s: Pentatricopeptide repeat (InterPro:IPR002885); BEST Arabidopsis thaliana protein match is: Tetratricopeptide repeat (TPR)-like superfamily protein (TAIR:AT2G29760.1)	Pentatricopeptide repeat | Tetratricopeptide-like helical domain	NO
AT1G08130	0.557994	4.87253	1.58124e-07	6.01783e-06	UP		DNA ligase 1	DNA ligase 1 (LIG1); FUNCTIONS IN: DNA binding, DNA ligase (ATP) activity, ATP binding; INVOLVED IN: DNA repair, DNA replication, DNA recombination; LOCATED IN: mitochondrion, nucleus; EXPRESSED IN: 24 plant structures; EXPRESSED DURING: 14 growth stages; CONTAINS InterPro DOMAIN/s: Nucleic acid-binding, OB-fold (InterPro:IPR012340), DNA ligase, N-terminal (InterPro:IPR012308), ATP dependent DNA …	DNA ligase, ATP-dependent | DNA ligase, ATP-dependent, C-terminal | DNA ligase, ATP-dependent, N-terminal | DNA ligase, ATP-dependent, central | DNA ligase, ATP-dependent, conserved site | Nucleic acid-binding, OB-fold	NO
AT1G08180	-0.472061	2.47375	0.00720781	0.0468029	DOWN			unknown protein		NO
AT1G08210	0.514263	4.59506	9.3122e-06	0.000197013	UP		Eukaryotic aspartyl protease family protein	Eukaryotic aspartyl protease family protein; FUNCTIONS IN: aspartic-type endopeptidase activity; INVOLVED IN: proteolysis; LOCATED IN: anchored to membrane, plant-type cell wall; EXPRESSED IN: 22 plant structures; EXPRESSED DURING: 13 growth stages; CONTAINS InterPro DOMAIN/s: Peptidase aspartic (InterPro:IPR021109), Peptidase aspartic, catalytic (InterPro:IPR009007), Peptidase A1 (InterPro:IPR00…		NO
AT1G08230	-1.12418	4.5034	7.26751e-20	2.42354e-17	DOWN		Transmembrane amino acid transporter family protein	Transmembrane amino acid transporter family protein; EXPRESSED IN: 22 plant structures; EXPRESSED DURING: 10 growth stages; CONTAINS InterPro DOMAIN/s: Amino acid transporter, transmembrane (InterPro:IPR013057); BEST Arabidopsis thaliana protein match is: Transmembrane amino acid transporter family protein (TAIR:AT5G41800.1)	Amino acid transporter, transmembrane	NO
AT1G08270	-1.36138	-0.592348	1.95048e-05	0.000369275	DOWN			CONTAINS InterPro DOMAIN/s: MIT (InterPro:IPR007330); BEST Arabidopsis thaliana protein match is: AAA-type ATPase family protein (TAIR:AT2G27600.1)	MIT | P-loop containing nucleoside triphosphate hydrolase	NO
AT1G08360	0.471346	7.52526	3.24657e-06	8.04619e-05	UP		Ribosomal protein L1p/L10e family	Ribosomal protein L1p/L10e family; FUNCTIONS IN: structural constituent of ribosome, RNA binding; INVOLVED IN: translation, RNA processing; LOCATED IN: cytosolic ribosome, ribosome, cytosolic large ribosomal subunit, plasma membrane; EXPRESSED IN: 22 plant structures; EXPRESSED DURING: 13 growth stages; CONTAINS InterPro DOMAIN/s: Ribosomal protein L1 (InterPro:IPR002143), Ribosomal protein L1, 2…	Ribosomal protein L1 | Ribosomal protein L1, 2-layer alpha/beta-sandwich | Ribosomal protein L1, 3-layer alpha/beta-sandwich | Ribosomal protein L1, conserved site | Ribosomal protein L1-like | Ribosomal protein L1/ribosomal biogenesis protein	NO
AT1G08410	0.548792	3.66889	0.000124328	0.00174188	UP		P-loop containing nucleoside triphosphate hydrolases superfamily protein	P-loop containing nucleoside triphosphate hydrolases superfamily protein; FUNCTIONS IN: GTP binding; INVOLVED IN: biological_process unknown; LOCATED IN: intracellular; EXPRESSED IN: 18 plant structures; EXPRESSED DURING: 13 growth stages; CONTAINS InterPro DOMAIN/s: GTP1/OBG (InterPro:IPR006073), GTP-binding protein, HSR1-related (InterPro:IPR002917); BEST Arabidopsis thaliana protein match is: …	GTP binding domain | P-loop containing nucleoside triphosphate hydrolase	NO
AT1G08460	-0.60848	4.80399	2.04497e-08	9.98205e-07	DOWN		histone deacetylase 8	histone deacetylase 8 (HDA08); CONTAINS InterPro DOMAIN/s: Histone deacetylase superfamily (InterPro:IPR000286); BEST Arabidopsis thaliana protein match is: histone deacetylase 5 (TAIR:AT5G61060.1)	Histone deacetylase domain | Histone deacetylase superfamily	NO
AT1G08530	-0.42998	3.1306	0.00233602	0.0191574	DOWN			unknown protein; FUNCTIONS IN: molecular_function unknown; INVOLVED IN: biological_process unknown; LOCATED IN: chloroplast; BEST Arabidopsis thaliana protein match is: unknown protein (TAIR:AT5G09995.2)		NO
AT1G08560	0.930554	3.78042	1.21991e-06	3.51779e-05	UP		syntaxin of plants 111	syntaxin of plants 111 (SYP111); FUNCTIONS IN: SNAP receptor activity; INVOLVED IN: intracellular protein transport, response to cyclopentenone, cellular membrane fusion; LOCATED IN: endomembrane system, plasma membrane, phragmoplast, cell plate; EXPRESSED IN: 22 plant structures; EXPRESSED DURING: 13 growth stages; CONTAINS InterPro DOMAIN/s: Target SNARE coiled-coil domain (InterPro:IPR000727),…	Syntaxin, N-terminal domain | Syntaxin/epimorphin, conserved site | Target SNARE coiled-coil domain | t-SNARE	NO
AT1G08580	0.409697	3.51165	0.00441704	0.031714	UP			unknown protein		NO
AT1G08610	0.758987	2.23734	4.062e-05	0.000689996	UP		Pentatricopeptide repeat (PPR) superfamily protein	Pentatricopeptide repeat (PPR) superfamily protein; CONTAINS InterPro DOMAIN/s: Pentatricopeptide repeat (InterPro:IPR002885); BEST Arabidopsis thaliana protein match is: Pentatricopeptide repeat (PPR-like) superfamily protein (TAIR:AT1G09900.1)	Pentatricopeptide repeat	NO
AT1G08630	-0.76129	3.87927	0.000395911	0.0045233	DOWN		threonine aldolase 1	threonine aldolase 1 (THA1); CONTAINS InterPro DOMAIN/s: Pyridoxal phosphate-dependent transferase, major domain (InterPro:IPR015424), Aromatic amino acid beta-eliminating lyase/threonine aldolase (InterPro:IPR001597), Pyridoxal phosphate-dependent transferase, major region, subdomain 1 (InterPro:IPR015421), Pyridoxal phosphate-dependent transferase, major region, subdomain 2 (InterPro:IPR015422)…	Aromatic amino acid beta-eliminating lyase/threonine aldolase | Pyridoxal phosphate-dependent transferase | Pyridoxal phosphate-dependent transferase, major region, subdomain 1 | Pyridoxal phosphate-dependent transferase, major region, subdomain 2 | Threonine aldolase	NO
AT1G08650	-1.03351	4.37475	4.53822e-07	1.50593e-05	DOWN		phosphoenolpyruvate carboxylase kinase 1	phosphoenolpyruvate carboxylase kinase 1 (PPCK1); FUNCTIONS IN: protein serine/threonine kinase activity, kinase activity; INVOLVED IN: protein amino acid phosphorylation; LOCATED IN: cellular_component unknown; EXPRESSED IN: 20 plant structures; EXPRESSED DURING: 13 growth stages; CONTAINS InterPro DOMAIN/s: Protein kinase, ATP binding site (InterPro:IPR017441), Protein kinase, catalytic domain …	Protein kinase domain | Protein kinase, ATP binding site | Protein kinase-like domain | Serine/threonine-protein kinase, active site | Serine/threonine/dual specificity protein kinase, catalytic domain	NO
AT1G08780	0.42144	4.09265	0.000857011	0.00852732	UP		ABI3-interacting protein 3	ABI3-interacting protein 3 (AIP3); FUNCTIONS IN: unfolded protein binding; INVOLVED IN: protein folding; LOCATED IN: prefoldin complex; EXPRESSED IN: 23 plant structures; EXPRESSED DURING: 13 growth stages; CONTAINS InterPro DOMAIN/s: Prefoldin beta-like (InterPro:IPR002777), Prefoldin, subunit 4 (InterPro:IPR016661)	Prefoldin | Prefoldin beta-like | Prefoldin, subunit 4	NO
AT1G08800	-0.40345	4.65182	7.33964e-05	0.00112315	DOWN		Protein of unknown function, DUF593	Protein of unknown function, DUF593; INVOLVED IN: response to salt stress; INVOLVED IN: response to salt stress, N-terminal protein myristoylation; LOCATED IN: endomembrane system; EXPRESSED IN: 20 plant structures; EXPRESSED DURING: 12 growth stages; CONTAINS InterPro DOMAIN/s: Protein of unknown function DUF593 (InterPro:IPR007656); BEST Arabidopsis thaliana protein match is: Protein of unknown…	Zein-binding domain	YES	1:2812857:C-CT;exonic_variant
AT1G08900	-0.327645	5.16497	0.000667757	0.00695017	DOWN		Major facilitator superfamily protein	Major facilitator superfamily protein; FUNCTIONS IN: carbohydrate transmembrane transporter activity; INVOLVED IN: transport, transmembrane transport; LOCATED IN: integral to membrane, membrane; CONTAINS InterPro DOMAIN/s: Sugar transporter, conserved site (InterPro:IPR005829), Major facilitator superfamily (InterPro:IPR020846), General substrate transporter (InterPro:IPR005828), Sugar/inositol t…	General substrate transporter | Major facilitator superfamily domain | Major facilitator superfamily domain, general substrate transporter | Sugar transporter, conserved site | Sugar/inositol transporter	NO
AT1G08910	0.340026	4.79444	0.00147601	0.0132569	UP		zinc ion binding;zinc ion binding	embryo defective 3001 (EMB3001); FUNCTIONS IN: zinc ion binding; INVOLVED IN: embryo development ending in seed dormancy; LOCATED IN: cellular_component unknown; CONTAINS InterPro DOMAIN/s: Zinc finger, MIZ-type (InterPro:IPR004181); BEST Arabidopsis thaliana protein match is: RING/U-box superfamily protein (TAIR:AT5G41580.1)	E3 SUMO protein ligase | Zinc finger, MIZ-type	YES	1:2859036:A-AC;exonic_variant,1:2859036:A-AC;exonic_variant&protein_coding
AT1G08920	0.423265	4.92023	0.00471404	0.0334395	UP		ERD (early response to dehydration) six-like 1	ERD (early response to dehydration) six-like 1 (ESL1); CONTAINS InterPro DOMAIN/s: Sugar transporter, conserved site (InterPro:IPR005829), Major facilitator superfamily (InterPro:IPR020846), General substrate transporter (InterPro:IPR005828), Sugar/inositol transporter (InterPro:IPR003663), Major facilitator superfamily, general substrate transporter (InterPro:IPR016196); BEST Arabidopsis thalian…	General substrate transporter | Major facilitator superfamily domain | Major facilitator superfamily domain, general substrate transporter | Sugar transporter, conserved site | Sugar/inositol transporter	NO
AT1G09000	1.23744	2.31324	3.15036e-11	2.91503e-09	UP		NPK1-related protein kinase 1	NPK1-related protein kinase 1 (NP1); CONTAINS InterPro DOMAIN/s: Protein kinase, ATP binding site (InterPro:IPR017441), Serine/threonine-protein kinase domain (InterPro:IPR002290), Serine/threonine-protein kinase-like domain (InterPro:IPR017442), Serine/threonine-protein kinase, active site (InterPro:IPR008271), Protein kinase-like domain (InterPro:IPR011009), Mitogen activated protein kinase kin…	Protein kinase domain | Protein kinase, ATP binding site | Protein kinase-like domain | Serine/threonine-protein kinase, active site | Serine/threonine/dual specificity protein kinase, catalytic domain	NO
AT1G09050	0.422378	2.79675	0.00514769	0.0359187	UP			unknown protein; BEST Arabidopsis thaliana protein match is: unknown protein (TAIR:AT1G09040.1)	Homeodomain-like	NO
AT1G09080	2.80702	-0.805509	1.09228e-05	0.000225562	UP		Heat shock protein 70 (Hsp 70) family protein	BIP3; FUNCTIONS IN: ATP binding; INVOLVED IN: protein folding, response to heat, pollen tube growth; LOCATED IN: endoplasmic reticulum lumen; EXPRESSED IN: 10 plant structures; EXPRESSED DURING: 10 growth stages; CONTAINS InterPro DOMAIN/s: Heat shock protein 70, conserved site (InterPro:IPR018181), Heat shock protein Hsp70 (InterPro:IPR001023), Heat shock protein 70 (InterPro:IPR013126); BEST Ar…	Heat shock protein 70 family | Heat shock protein 70, conserved site | Heat shock protein 70kD, C-terminal domain | Heat shock protein 70kD, peptide-binding domain	NO
AT1G09100	0.335307	4.45919	0.00209264	0.0175416	UP		26S proteasome AAA-ATPase subunit RPT5B	26S proteasome AAA-ATPase subunit RPT5B (RPT5B); FUNCTIONS IN: ATPase activity, calmodulin binding; INVOLVED IN: glucose mediated signaling pathway, proteasomal protein catabolic process, embryo sac development, pollen development; LOCATED IN: proteasome complex, plasma membrane, membrane; EXPRESSED IN: 26 plant structures; EXPRESSED DURING: 15 growth stages; CONTAINS InterPro DOMAIN/s: ATPase, A…	26S proteasome subunit P45 | AAA+ ATPase domain | ATPase, AAA-type, conserved site | ATPase, AAA-type, core | P-loop containing nucleoside triphosphate hydrolase	NO
AT1G09130	-0.333819	7.33341	0.000436566	0.00490623	DOWN		ATP-dependent caseinolytic (Clp) protease/crotonase family protein	ATP-dependent caseinolytic (Clp) protease/crotonase family protein; FUNCTIONS IN: serine-type endopeptidase activity; INVOLVED IN: proteolysis; LOCATED IN: in 6 components; LOCATED IN: mitochondrion, chloroplast stroma; LOCATED IN: thylakoid, mitochondrion, chloroplast stroma, chloroplast; EXPRESSED IN: 24 plant structures; EXPRESSED DURING: 15 growth stages; CONTAINS InterPro DOMAIN/s: Peptidase…	ATP-dependent Clp protease proteolytic subunit | Clp protease proteolytic subunit /Translocation-enhancing protein TepA | ClpP/crotonase-like domain	NO
AT1G09190	0.940965	1.25349	8.7705e-06	0.00018708	UP		Tetratricopeptide repeat (TPR)-like superfamily protein	Tetratricopeptide repeat (TPR)-like superfamily protein; FUNCTIONS IN: molecular_function unknown; INVOLVED IN: biological_process unknown; LOCATED IN: mitochondrion; EXPRESSED IN: shoot apex, embryo, sperm cell, flower, seed; EXPRESSED DURING: petal differentiation and expansion stage, E expanded cotyledon stage, D bilateral stage; CONTAINS InterPro DOMAIN/s: Pentatricopeptide repeat (InterPro:I…	Pentatricopeptide repeat | Tetratricopeptide-like helical domain	NO
AT1G09200	0.660463	4.98089	4.6249e-09	2.70436e-07	UP		Histone superfamily protein	Histone superfamily protein; FUNCTIONS IN: DNA binding; INVOLVED IN: nucleosome assembly; LOCATED IN: chloroplast, nucleosome; EXPRESSED IN: 24 plant structures; EXPRESSED DURING: 15 growth stages; CONTAINS InterPro DOMAIN/s: Histone H3 (InterPro:IPR000164), Histone-fold (InterPro:IPR009072), Histone core (InterPro:IPR007125); BEST Arabidopsis thaliana protein match is: Histone superfamily protei…	Histone H3/CENP-A | Histone core | Histone-fold	NO
AT1G09290	0.489363	3.35839	0.000930525	0.00912214	UP			unknown protein		NO
AT1G09320	0.556991	3.32797	7.91149e-05	0.0011976	UP		agenet domain-containing protein	agenet domain-containing protein; FUNCTIONS IN: RNA binding; INVOLVED IN: biological_process unknown; LOCATED IN: chloroplast; EXPRESSED IN: 24 plant structures; EXPRESSED DURING: 15 growth stages; CONTAINS InterPro DOMAIN/s: Tudor-like, plant (InterPro:IPR014002), Agenet (InterPro:IPR008395); BEST Arabidopsis thaliana protein match is: agenet domain-containing protein (TAIR:AT3G06520.1)	Agenet-like domain | Tudor-like, plant	NO
AT1G09340	-0.505478	9.41697	4.94019e-07	1.62174e-05	DOWN		chloroplast RNA binding	chloroplast RNA binding (CRB); FUNCTIONS IN: coenzyme binding, binding, catalytic activity; INVOLVED IN: in 6 processes; LOCATED IN: in 10 components; EXPRESSED IN: 24 plant structures; EXPRESSED DURING: 14 growth stages; CONTAINS InterPro DOMAIN/s: NAD-dependent epimerase/dehydratase (InterPro:IPR001509), NAD(P)-binding domain (InterPro:IPR016040); BEST Arabidopsis thaliana protein match is: chl…	NAD(P)-binding domain	NO
AT1G09420	-0.557765	3.64118	0.000193046	0.00249788	DOWN		glucose-6-phosphate dehydrogenase 4	glucose-6-phosphate dehydrogenase 4 (G6PD4); FUNCTIONS IN: glucose-6-phosphate dehydrogenase activity; INVOLVED IN: oxidation reduction, glucose metabolic process, metabolic process; LOCATED IN: chloroplast; EXPRESSED IN: 14 plant structures; EXPRESSED DURING: 6 growth stages; CONTAINS InterPro DOMAIN/s: Glucose-6-phosphate dehydrogenase, C-terminal (InterPro:IPR022675), NAD(P)-binding domain (In…	Glucose-6-phosphate dehydrogenase | Glucose-6-phosphate dehydrogenase, C-terminal | Glucose-6-phosphate dehydrogenase, NAD-binding | NAD(P)-binding domain	NO
AT1G09450	0.908432	1.30521	0.000161641	0.00215442	UP		Protein kinase superfamily protein	Protein kinase superfamily protein; FUNCTIONS IN: protein kinase activity, ATP binding; INVOLVED IN: protein amino acid phosphorylation, N-terminal protein myristoylation; LOCATED IN: cellular_component unknown; EXPRESSED IN: 17 plant structures; EXPRESSED DURING: 11 growth stages; CONTAINS InterPro DOMAIN/s: Protein kinase, catalytic domain (InterPro:IPR000719)	Domain of unknown function DUF3635 | Protein kinase domain | Protein kinase-like domain	NO
AT1G09460	0.665019	1.83012	0.00294874	0.0230647	UP		Carbohydrate-binding X8 domain superfamily protein	Carbohydrate-binding X8 domain superfamily protein; LOCATED IN: endomembrane system; EXPRESSED IN: 19 plant structures; EXPRESSED DURING: 12 growth stages; CONTAINS InterPro DOMAIN/s: X8 (InterPro:IPR012946); BEST Arabidopsis thaliana protein match is: Carbohydrate-binding X8 domain superfamily protein (TAIR:AT2G30933.1)	X8	NO
AT1G09470	0.697482	1.55395	0.00176292	0.0152365	UP			unknown protein; FUNCTIONS IN: molecular_function unknown; BEST Arabidopsis thaliana protein match is: unknown protein (TAIR:AT5G26770.1); EXPRESSED IN: cotyledon		NO
AT1G09480	-2.43639	1.02335	1.53215e-20	5.54884e-18	DOWN		NAD(P)-binding Rossmann-fold superfamily protein	NAD(P)-binding Rossmann-fold superfamily protein; FUNCTIONS IN: alcohol dehydrogenase (NAD) activity, cinnamyl-alcohol dehydrogenase activity; INVOLVED IN: lignin biosynthetic process, cellular metabolic process, metabolic process; LOCATED IN: cellular_component unknown; CONTAINS InterPro DOMAIN/s: NAD-dependent epimerase/dehydratase (InterPro:IPR001509), NAD(P)-binding domain (InterPro:IPR016040…	NAD(P)-binding domain | NAD-dependent epimerase/dehydratase, N-terminal domain	NO
AT1G09486	-1.17546	-0.0497585	6.39894e-05	0.0010015	DOWN			pseudogene, 60S ribosomal protein L21 (RPL21B), temporary automated functional assignment; blastp match of 67% identity and 2.0e-52 P-value to GP|3885884|gb|AAC78102.1||AF093630 60S ribosomal protein L21 {Oryza sativa}		NO
AT1G09490	-0.448563	5.80879	8.70739e-05	0.00129481	DOWN		NAD(P)-binding Rossmann-fold superfamily protein	NAD(P)-binding Rossmann-fold superfamily protein; FUNCTIONS IN: alcohol dehydrogenase (NAD) activity, cinnamyl-alcohol dehydrogenase activity; INVOLVED IN: lignin biosynthetic process, cellular metabolic process, metabolic process; CONTAINS InterPro DOMAIN/s: NAD-dependent epimerase/dehydratase (InterPro:IPR001509), NAD(P)-binding domain (InterPro:IPR016040); LOCATED IN: endomembrane system; BEST…	NAD(P)-binding domain | NAD-dependent epimerase/dehydratase, N-terminal domain	NO
AT1G09500	-1.68661	4.88669	4.52996e-06	0.000106397	DOWN		NAD(P)-binding Rossmann-fold superfamily protein	NAD(P)-binding Rossmann-fold superfamily protein; FUNCTIONS IN: alcohol dehydrogenase (NAD) activity, cinnamyl-alcohol dehydrogenase activity; INVOLVED IN: lignin biosynthetic process, cellular metabolic process, metabolic process; LOCATED IN: endomembrane system; EXPRESSED IN: 9 plant structures; EXPRESSED DURING: LP.06 six leaves visible, LP.04 four leaves visible, 4 anthesis, petal differentia…	NAD(P)-binding domain | NAD-dependent epimerase/dehydratase, N-terminal domain	NO
AT1G09520	0.437263	4.40657	0.00134482	0.0122851	UP			LOCATED IN: chloroplast; EXPRESSED IN: 21 plant structures; EXPRESSED DURING: 12 growth stages; CONTAINS InterPro DOMAIN/s: Zinc finger, PHD-type, conserved site (InterPro:IPR019786); BEST Arabidopsis thaliana protein match is: PHD finger family protein (TAIR:AT3G17460.1)	Zinc finger, PHD-type, conserved site	NO
AT1G09530	0.44615	6.99498	7.01482e-05	0.0010818	UP		phytochrome interacting factor 3	phytochrome interacting factor 3 (PIF3); CONTAINS InterPro DOMAIN/s: Helix-loop-helix DNA-binding domain (InterPro:IPR001092), Helix-loop-helix DNA-binding (InterPro:IPR011598); BEST Arabidopsis thaliana protein match is: phytochrome interacting factor 3-like 1 (TAIR:AT2G46970.1)	Myc-type, basic helix-loop-helix (bHLH) domain	NO
AT1G09575	1.14939	2.95729	8.16323e-09	4.41325e-07	UP		Protein of unknown function (DUF607)	Protein of unknown function (DUF607); FUNCTIONS IN: molecular_function unknown; INVOLVED IN: biological_process unknown; LOCATED IN: mitochondrion; EXPRESSED IN: 17 plant structures; EXPRESSED DURING: 9 growth stages; CONTAINS InterPro DOMAIN/s: Protein of unknown function DUF607 (InterPro:IPR006769); BEST Arabidopsis thaliana protein match is: Protein of unknown function (DUF607) (TAIR:AT1G57610…	Coiled-coil domain containing protein 109, C-terminal	NO
AT1G09590	0.523347	6.24341	4.19316e-07	1.40388e-05	UP		Translation protein SH3-like family protein	Translation protein SH3-like family protein; FUNCTIONS IN: structural constituent of ribosome; INVOLVED IN: translation; LOCATED IN: cytosolic ribosome, ribosome, cytosolic large ribosomal subunit, nucleolus, chloroplast; EXPRESSED IN: guard cell, juvenile leaf; CONTAINS InterPro DOMAIN/s: Translation protein SH3-like (InterPro:IPR008991), Ribosomal protein L21e (InterPro:IPR001147), Ribosomal pr…	Ribosomal protein L21e | Ribosomal protein L21e, conserved site | Translation protein SH3-like domain	NO
AT1G09600	0.986271	0.0816018	0.00191515	0.0162879	UP		Protein kinase superfamily protein	Protein kinase superfamily protein; FUNCTIONS IN: protein serine/threonine kinase activity, protein kinase activity, kinase activity, ATP binding; INVOLVED IN: protein amino acid phosphorylation, N-terminal protein myristoylation; LOCATED IN: cellular_component unknown; EXPRESSED IN: 18 plant structures; EXPRESSED DURING: 11 growth stages; CONTAINS InterPro DOMAIN/s: Protein kinase, ATP binding s…	Protein kinase domain | Protein kinase, ATP binding site | Protein kinase-like domain | Serine/threonine-protein kinase, active site | Serine/threonine/dual specificity protein kinase, catalytic domain	NO
AT1G09620	0.290495	6.85311	0.00160044	0.0141333	UP		ATP binding;leucine-tRNA ligases;aminoacyl-tRNA ligases;nucleotide binding;ATP binding;aminoacyl-tRNA ligases	ATP binding;leucine-tRNA ligases;aminoacyl-tRNA ligases;nucleotide binding;ATP binding;aminoacyl-tRNA ligases; FUNCTIONS IN: nucleotide binding, aminoacyl-tRNA ligase activity, leucine-tRNA ligase activity, ATP binding; INVOLVED IN: leucyl-tRNA aminoacylation, translation, tRNA aminoacylation for protein translation; LOCATED IN: chloroplast; EXPRESSED IN: 25 plant structures; EXPRESSED DURING: 13…	Aminoacyl-tRNA synthetase, class 1a, anticodon-binding | Aminoacyl-tRNA synthetase, class I, conserved site | Aminoacyl-tRNA synthetase, class Ia | Leucyl-tRNA synthetase, class Ia, archaeal/eukaryotic cytosolic | Rossmann-like alpha/beta/alpha sandwich fold | Valyl/Leucyl/Isoleucyl-tRNA synthetase, anticodon-binding | Valyl/Leucyl/Isoleucyl-tRNA synthetase, editing domain	NO
AT1G09630	0.403015	3.55121	0.00164426	0.0144236	UP		RAB GTPase 11C	RAB GTPase 11C (RAB11c); FUNCTIONS IN: GTP binding; INVOLVED IN: cytokinesis; LOCATED IN: endosome, plasma membrane, cell plate; EXPRESSED IN: 26 plant structures; EXPRESSED DURING: 13 growth stages; CONTAINS InterPro DOMAIN/s: Ras GTPase (InterPro:IPR001806), Small GTP-binding protein (InterPro:IPR005225), Small GTPase (InterPro:IPR020851), Ras (InterPro:IPR013753), Ras small GTPase, Rab type (I…	P-loop containing nucleoside triphosphate hydrolase | Small GTP-binding protein domain | Small GTPase superfamily | Small GTPase superfamily, Rab type	NO
AT1G09680	0.648761	1.22904	0.00668561	0.044092	UP		Pentatricopeptide repeat (PPR) superfamily protein	Pentatricopeptide repeat (PPR) superfamily protein; CONTAINS InterPro DOMAIN/s: Pentatricopeptide repeat (InterPro:IPR002885); BEST Arabidopsis thaliana protein match is: Tetratricopeptide repeat (TPR)-like superfamily protein (TAIR:AT5G39710.1)	Pentatricopeptide repeat	NO
AT1G09690	0.386853	7.6739	0.000107299	0.00154244	UP		Translation protein SH3-like family protein	Translation protein SH3-like family protein; FUNCTIONS IN: structural constituent of ribosome; INVOLVED IN: translation; LOCATED IN: ribosome, cytosolic large ribosomal subunit; EXPRESSED IN: juvenile leaf, pollen tube; CONTAINS InterPro DOMAIN/s: Translation protein SH3-like (InterPro:IPR008991), Ribosomal protein L21e (InterPro:IPR001147), Ribosomal protein L21e, conserved site (InterPro:IPR018…	Ribosomal protein L21e | Ribosomal protein L21e, conserved site | Translation protein SH3-like domain	NO
AT1G09700	0.556566	3.31807	0.000179555	0.00235132	UP		dsRNA-binding domain-like superfamily protein	HYPONASTIC LEAVES 1 (HYL1); CONTAINS InterPro DOMAIN/s: Double-stranded RNA-binding (InterPro:IPR001159), Double-stranded RNA-binding-like (InterPro:IPR014720); BEST Arabidopsis thaliana protein match is: dsRNA-binding protein 2 (TAIR:AT2G28380.1)	Double-stranded RNA-binding domain | Ribonuclease III	NO
AT1G09710	0.434246	3.21039	0.00498472	0.0349844	UP		Homeodomain-like superfamily protein	Homeodomain-like superfamily protein; FUNCTIONS IN: DNA binding; INVOLVED IN: regulation of transcription; CONTAINS InterPro DOMAIN/s: SANT, DNA-binding (InterPro:IPR001005), Homeodomain-like (InterPro:IPR009057), Myb, DNA-binding (InterPro:IPR014778), HTH transcriptional regulator, Myb-type, DNA-binding (InterPro:IPR017930), Homeodomain-related (InterPro:IPR012287), Myb transcription factor (Int…	Homeodomain-like | Myb domain | SANT/Myb domain	NO
AT1G09730	0.364545	5.61612	0.000105586	0.00152106	UP		Cysteine proteinases superfamily protein	Cysteine proteinases superfamily protein; FUNCTIONS IN: cysteine-type peptidase activity; INVOLVED IN: proteolysis; LOCATED IN: cellular_component unknown; EXPRESSED IN: 23 plant structures; EXPRESSED IN: 24 plant structures; EXPRESSED DURING: 14 growth stages; CONTAINS InterPro DOMAIN/s: Peptidase C48, SUMO/Sentrin/Ubl1 (InterPro:IPR003653); BEST Arabidopsis thaliana protein match is: Cysteine p…	Peptidase C48, SUMO/Sentrin/Ubl1	NO
AT1G09770	0.296519	7.06631	0.00364282	0.0273443	UP	YES	cell division cycle 5	cell division cycle 5 (CDC5); FUNCTIONS IN: DNA binding, sequence-specific DNA binding transcription factor activity; INVOLVED IN: defense response signaling pathway, resistance gene-independent, defense response signaling pathway, resistance gene-dependent, defense response to bacterium, defense response to fungus, regulation of transcription; LOCATED IN: chloroplast; EXPRESSED IN: 24 plant stru…	Domain of unknown function DUF3351 | Homeodomain-like | Myb domain | SANT/Myb domain	NO
AT1G09780	0.348176	6.09386	0.00418566	0.0304487	UP		Phosphoglycerate mutase, 2,3-bisphosphoglycerate-independent	Phosphoglycerate mutase, 2,3-bisphosphoglycerate-independent; FUNCTIONS IN: manganese ion binding, phosphoglycerate mutase activity, 2,3-bisphosphoglycerate-independent phosphoglycerate mutase activity, catalytic activity, metal ion binding; INVOLVED IN: response to cadmium ion, response to cold; LOCATED IN: mitochondrial envelope, cytosol, chloroplast, plasma membrane; EXPRESSED IN: 26 plant str…	Alkaline phosphatase-like, alpha/beta/alpha | Alkaline-phosphatase-like, core domain | BPG-independent PGAM, N-terminal | Metalloenzyme | Phosphoglycerate mutase, 2,3-bisphosphoglycerate-independent	NO
AT1G09815	0.458328	3.73097	0.000240727	0.00300183	UP		polymerase delta 4	polymerase delta 4 (POLD4); FUNCTIONS IN: DNA-directed DNA polymerase activity; INVOLVED IN: DNA replication; LOCATED IN: nucleus; EXPRESSED IN: 24 plant structures; EXPRESSED DURING: 15 growth stages; CONTAINS InterPro DOMAIN/s: DNA polymerase delta, subunit 4 (InterPro:IPR007218)	DNA polymerase delta, subunit 4	NO
AT1G09830	0.504852	4.39648	1.5853e-05	0.000309714	UP		Glycinamide ribonucleotide (GAR) synthetase	Glycinamide ribonucleotide (GAR) synthetase; FUNCTIONS IN: phosphoribosylamine-glycine ligase activity; INVOLVED IN: purine base biosynthetic process, purine nucleotide biosynthetic process; LOCATED IN: chloroplast; EXPRESSED IN: 23 plant structures; EXPRESSED DURING: 13 growth stages; CONTAINS InterPro DOMAIN/s: Phosphoribosylglycinamide synthetase, conserved site (InterPro:IPR020559), Phosphori…	ATP-grasp fold | ATP-grasp fold, subdomain 1 | ATP-grasp fold, subdomain 2 | Phosphoribosylglycinamide synthetase | Phosphoribosylglycinamide synthetase, ATP-grasp (A) domain | Phosphoribosylglycinamide synthetase, C-domain | Phosphoribosylglycinamide synthetase, N-terminal | Phosphoribosylglycinamide synthetase, conserved site | Pre-ATP-grasp domain | Rudiment single hybrid motif	NO
AT1G09960	0.609539	2.22161	0.00230259	0.0189247	UP		sucrose transporter 4	sucrose transporter 4 (SUT4); FUNCTIONS IN: sucrose transmembrane transporter activity, carbohydrate transmembrane transporter activity, sugar:hydrogen symporter activity, sucrose:hydrogen symporter activity; INVOLVED IN: sucrose transport, transmembrane transport; LOCATED IN: plasma membrane, vacuole, membrane; EXPRESSED IN: 24 plant structures; EXPRESSED DURING: 13 growth stages; CONTAINS Inter…	Major facilitator superfamily domain, general substrate transporter | Sucrose/H+ symporter, plant	NO
AT1G10030	0.490547	3.15971	0.00153318	0.0136683	UP		homolog of yeast ergosterol28	homolog of yeast ergosterol28 (ERG28); INVOLVED IN: biological_process unknown; LOCATED IN: endomembrane system, integral to membrane; EXPRESSED IN: 22 plant structures; EXPRESSED DURING: 13 growth stages; CONTAINS InterPro DOMAIN/s: Erg28-like (InterPro:IPR005352)	Erg28	NO
AT1G10095	0.500323	2.99466	0.00243208	0.0198101	UP		Protein prenylyltransferase superfamily protein	Protein prenylyltransferase superfamily protein; FUNCTIONS IN: protein prenyltransferase activity; INVOLVED IN: protein amino acid prenylation; LOCATED IN: cellular_component unknown; CONTAINS InterPro DOMAIN/s: Protein prenyltransferase (InterPro:IPR008940), Protein prenyltransferase, alpha subunit (InterPro:IPR002088)	Protein prenyltransferase, alpha subunit	YES	1:3297395:G-GA;exonic_variant
AT1G10110	2.18416	-1.08543	2.37401e-06	6.19357e-05	UP		F-box family protein	F-box family protein; BEST Arabidopsis thaliana protein match is: F-box family protein with a domain of unknown function (DUF295) (TAIR:AT4G22165.1)	F-box domain | Quinoprotein amine dehydrogenase, beta chain-like	NO
AT1G10120	0.53749	4.75582	4.34871e-05	0.000731247	UP		basic helix-loop-helix (bHLH) DNA-binding superfamily protein	basic helix-loop-helix (bHLH) DNA-binding superfamily protein; FUNCTIONS IN: DNA binding, sequence-specific DNA binding transcription factor activity; INVOLVED IN: regulation of transcription; LOCATED IN: nucleus; EXPRESSED IN: 22 plant structures; EXPRESSED DURING: 13 growth stages; CONTAINS InterPro DOMAIN/s: Helix-loop-helix DNA-binding domain (InterPro:IPR001092), Helix-loop-helix DNA-binding…	Myc-type, basic helix-loop-helix (bHLH) domain	NO
AT1G10140	0.536523	5.14882	3.30546e-05	0.000580455	UP		Uncharacterised conserved protein UCP031279	Uncharacterised conserved protein UCP031279; FUNCTIONS IN: molecular_function unknown; INVOLVED IN: biological_process unknown; LOCATED IN: plasma membrane; EXPRESSED IN: 23 plant structures; EXPRESSED DURING: 13 growth stages; CONTAINS InterPro DOMAIN/s: Uncharacterised conserved protein UCP031279 (InterPro:IPR016972); BEST Arabidopsis thaliana protein match is: Uncharacterised conserved protein…	Uncharacterised conserved protein UCP031279	NO
AT1G10150	0.428972	5.97513	0.00062896	0.0066222	UP		Carbohydrate-binding protein	Carbohydrate-binding protein; FUNCTIONS IN: carbohydrate binding; LOCATED IN: mitochondrion; EXPRESSED IN: 24 plant structures; EXPRESSED DURING: 15 growth stages; BEST Arabidopsis thaliana protein match is: Carbohydrate-binding protein (TAIR:AT1G59510.1)		NO
AT1G10240	0.56823	3.76632	8.38519e-06	0.000180116	UP		FAR1-related sequence 11	FAR1-related sequence 11 (FRS11); FUNCTIONS IN: zinc ion binding; INVOLVED IN: response to red or far red light; LOCATED IN: cellular_component unknown; EXPRESSED IN: 20 plant structures; EXPRESSED DURING: 12 growth stages; CONTAINS InterPro DOMAIN/s: MULE transposase, conserved domain (InterPro:IPR018289), Transcription factor, FAR1-related (InterPro:IPR004330), Zinc finger, PMZ-type (InterPro:I…	FAR1 DNA binding domain | MULE transposase domain | Zinc finger, PMZ-type | Zinc finger, SWIM-type	NO
AT1G10270	0.739226	2.46808	6.49257e-05	0.00101474	UP		glutamine-rich protein 23	glutamine-rich protein 23 (GRP23); FUNCTIONS IN: binding; INVOLVED IN: embryo development, cell division; LOCATED IN: nucleus; EXPRESSED IN: 26 plant structures; EXPRESSED DURING: 14 growth stages; CONTAINS InterPro DOMAIN/s: Pentatricopeptide repeat (InterPro:IPR002885), Tetratricopeptide-like helical (InterPro:IPR011990); BEST Arabidopsis thaliana protein match is: Pentatricopeptide repeat (PPR…	Pentatricopeptide repeat | Tetratricopeptide-like helical domain	NO
AT1G10320	0.571963	4.62975	2.48341e-06	6.43909e-05	UP		Zinc finger C-x8-C-x5-C-x3-H type family protein	Zinc finger C-x8-C-x5-C-x3-H type family protein; FUNCTIONS IN: RNA binding, nucleotide binding, zinc ion binding, nucleic acid binding; LOCATED IN: nucleus; EXPRESSED IN: 22 plant structures; EXPRESSED DURING: 13 growth stages; CONTAINS InterPro DOMAIN/s: Zinc finger, CCCH-type (InterPro:IPR000571), RNA recognition motif, RNP-1 (InterPro:IPR000504), Nucleotide-binding, alpha-beta plait (InterPro…	Nucleotide-binding, alpha-beta plait | RNA recognition motif domain | RNA recognition motif domain, eukaryote | U2 auxiliary factor small subunit | Zinc finger, CCCH-type	NO
AT1G10360	-0.32016	5.75173	0.0015947	0.0140937	DOWN		glutathione S-transferase TAU 18	glutathione S-transferase TAU 18 (GSTU18); CONTAINS InterPro DOMAIN/s: Thioredoxin fold (InterPro:IPR012335), Glutathione S-transferase, C-terminal (InterPro:IPR004046), Glutathione S-transferase, C-terminal-like (InterPro:IPR010987), Glutathione S-transferase/chloride channel, C-terminal (InterPro:IPR017933), Glutathione S-transferase, N-terminal (InterPro:IPR004045), Thioredoxin-like fold (Inte…	Glutathione S-transferase, C-terminal | Glutathione S-transferase, C-terminal-like | Glutathione S-transferase, N-terminal | Thioredoxin-like fold	NO
AT1G10385	2.7957	-1.92941	4.7123e-05	0.000781847	UP		Vps51/Vps67 family (components of vesicular transport) protein	Vps51/Vps67 family (components of vesicular transport) protein; CONTAINS InterPro DOMAIN/s: Vps51/Vps67 (InterPro:IPR014812); BEST Arabidopsis thaliana protein match is: exocyst complex component 84B (TAIR:AT5G49830.1)		NO
AT1G10417	1.08404	-0.252072	0.000228096	0.00287298	UP			unknown protein		NO
AT1G10450	0.409507	4.96885	0.000109605	0.0015709	UP		SIN3-like 6	SIN3-like 6 (SNL6); INVOLVED IN: regulation of transcription, DNA-dependent; LOCATED IN: nucleus; EXPRESSED IN: cultured cell; CONTAINS InterPro DOMAIN/s: Histone deacetylase interacting (InterPro:IPR013194), Paired amphipathic helix (InterPro:IPR003822); BEST Arabidopsis thaliana protein match is: SIN3-like 5 (TAIR:AT1G59890.1)		NO
AT1G10490	0.543766	4.1472	3.58721e-05	0.000621186	UP		Domain of unknown function (DUF1726) ;Putative ATPase (DUF699)	CONTAINS InterPro DOMAIN/s: Domain of unknown function DUF1726 (InterPro:IPR013562), Domain of unknown function DUF699, exodeoxyribonuclease V alpha chain (InterPro:IPR007807); BEST Arabidopsis thaliana protein match is: Domain of unknown function (DUF1726) ;Putative ATPase (DUF699) (TAIR:AT3G57940.1)	Domain of unknown function DUF1726 | GNAT domain | Helicase domain | Possible tRNA binding domain	NO
AT1G10500	-0.380192	6.22662	7.76338e-05	0.00117942	DOWN		chloroplast-localized ISCA-like protein	chloroplast-localized ISCA-like protein (CPISCA); CONTAINS InterPro DOMAIN/s: FeS cluster insertion, C-terminal, conserved site (InterPro:IPR017870), FeS cluster biogenesis (InterPro:IPR000361), FeS cluster insertion (InterPro:IPR016092); BEST Arabidopsis thaliana protein match is: Iron-sulphur cluster biosynthesis family protein (TAIR:AT5G03905.1)	FeS cluster biogenesis | FeS cluster insertion protein | FeS cluster insertion, C-terminal, conserved site	NO
AT1G10580	0.288046	5.04669	0.00455889	0.0325795	UP	YES	Transducin/WD40 repeat-like superfamily protein	Transducin/WD40 repeat-like superfamily protein; CONTAINS InterPro DOMAIN/s: WD40 repeat 2 (InterPro:IPR019782), WD40 repeat, conserved site (InterPro:IPR019775), WD40 repeat (InterPro:IPR001680), G-protein beta WD-40 repeat, region (InterPro:IPR020472), WD40 repeat-like-containing domain (InterPro:IPR011046), WD40-repeat-containing domain (InterPro:IPR017986), WD40/YVTN repeat-like-containing do…	G-protein beta WD-40 repeat | WD40 repeat | WD40 repeat, conserved site | WD40-repeat-containing domain | WD40/YVTN repeat-like-containing domain	NO
AT1G10610	-1.89827	3.24261	2.58612e-30	2.17758e-27	DOWN		basic helix-loop-helix (bHLH) DNA-binding superfamily protein	basic helix-loop-helix (bHLH) DNA-binding superfamily protein; FUNCTIONS IN: DNA binding, sequence-specific DNA binding transcription factor activity; INVOLVED IN: regulation of transcription; LOCATED IN: nucleus; EXPRESSED IN: 22 plant structures; EXPRESSED DURING: 13 growth stages; CONTAINS InterPro DOMAIN/s: Helix-loop-helix DNA-binding domain (InterPro:IPR001092), Helix-loop-helix DNA-binding…	Myc-type, basic helix-loop-helix (bHLH) domain | Transcription factor MYC/MYB N-terminal	NO
AT1G10657	-0.662693	1.9028	0.00128219	0.011809	DOWN		Plant protein 1589 of unknown function	Plant protein 1589 of unknown function; FUNCTIONS IN: molecular_function unknown; INVOLVED IN: biological_process unknown; LOCATED IN: cellular_component unknown; CONTAINS InterPro DOMAIN/s: Conserved hypothetical protein CHP01589, plant (InterPro:IPR006476); BEST Arabidopsis thaliana protein match is: Plant protein 1589 of unknown function (TAIR:AT3G55240.1)	Conserved hypothetical protein CHP01589, plant	NO
AT1G10682	0.735572	5.36528	8.56627e-07	2.57608e-05	UP		other RNA			NO
AT1G10690	0.616578	3.4627	0.000101452	0.00147221	UP			unknown protein; BEST Arabidopsis thaliana protein match is: unknown protein (TAIR:AT1G60783.1)		NO
AT1G10700	0.329456	4.67401	0.00166829	0.0145795	UP		phosphoribosyl pyrophosphate (PRPP) synthase 3	phosphoribosyl pyrophosphate (PRPP) synthase 3 (PRS3); FUNCTIONS IN: magnesium ion binding, ribose phosphate diphosphokinase activity; INVOLVED IN: nucleotide biosynthetic process, nucleoside metabolic process; LOCATED IN: chloroplast; EXPRESSED IN: 23 plant structures; EXPRESSED DURING: 15 growth stages; CONTAINS InterPro DOMAIN/s: Phosphoribosyltransferase (InterPro:IPR000836), Phosphoribosyl p…	Phosphoribosyltransferase domain | Phosphoribosyltransferase-like | Ribose-phosphate diphosphokinase | Ribose-phosphate pyrophosphokinase, N-terminal domain	NO
AT1G10865	0.351009	3.87905	0.00594342	0.040229	UP			FUNCTIONS IN: molecular_function unknown; INVOLVED IN: biological_process unknown; LOCATED IN: cellular_component unknown; CONTAINS InterPro DOMAIN/s: Cytochrome c oxidase assembly protein PET191, N-terminal (InterPro:IPR018793)	Cytochrome c oxidase assembly protein PET191	NO
AT1G10890	-0.82843	5.88283	2.85317e-15	5.49129e-13	DOWN	YES		unknown protein; FUNCTIONS IN: molecular_function unknown; INVOLVED IN: biological_process unknown; LOCATED IN: chloroplast; EXPRESSED IN: petal, flower, leaf; EXPRESSED DURING: LP.04 four leaves visible, 4 anthesis, petal differentiation and expansion stage; BEST Arabidopsis thaliana protein match is: unknown protein (TAIR:AT5G13340.1)		NO
AT1G10910	-0.283329	5.59739	0.00367849	0.0275696	DOWN		Pentatricopeptide repeat (PPR) superfamily protein	Pentatricopeptide repeat (PPR) superfamily protein; CONTAINS InterPro DOMAIN/s: Pentatricopeptide repeat (InterPro:IPR002885); BEST Arabidopsis thaliana protein match is: plastid transcriptionally active 2 (TAIR:AT1G74850.1)	Pentatricopeptide repeat	NO
AT1G10920	-0.549303	3.57344	1.36458e-05	0.000273086	DOWN		NB-ARC domain-containing disease resistance protein	LOV1; FUNCTIONS IN: ATP binding; INVOLVED IN: defense response to fungus, response to molecule of fungal origin, defense response; LOCATED IN: cellular_component unknown; EXPRESSED IN: 14 plant structures; EXPRESSED DURING: 7 growth stages; CONTAINS InterPro DOMAIN/s: NB-ARC (InterPro:IPR002182), Disease resistance protein (InterPro:IPR000767); BEST Arabidopsis thaliana protein match is: Disease …	NB-ARC | P-loop containing nucleoside triphosphate hydrolase	NO
AT1G10930	0.407259	4.33813	0.000532155	0.00577991	UP		DNA helicase (RECQl4A)	RECQ4A; FUNCTIONS IN: helicase activity, ATP-dependent 3'-5' DNA helicase activity, ATP-dependent helicase activity, nucleic acid binding, ATP binding; INVOLVED IN: chromosome organization, response to DNA damage stimulus, double-strand break repair via homologous recombination; LOCATED IN: intracellular; CONTAINS InterPro DOMAIN/s: DNA/RNA helicase, DEAD/DEAH box type, N-terminal (InterPro:IPR01…	DEAD/DEAH box helicase domain | DNA helicase, ATP-dependent, RecQ type | DNA/RNA helicase, ATP-dependent, DEAH-box type, conserved site | HRDC domain | HRDC-like | Helicase, C-terminal | Helicase, superfamily 1/2, ATP-binding domain | P-loop containing nucleoside triphosphate hydrolase | RQC domain | Winged helix-turn-helix DNA-binding domain	YES	1:3648818:A-C;intronic_variant
AT1G10940	0.317468	6.68265	0.00172341	0.0149565	UP		Protein kinase superfamily protein	Protein kinase superfamily protein; SNF1-related protein kinase 2.4 (SNRK2.4); CONTAINS InterPro DOMAIN/s: Protein kinase, ATP binding site (InterPro:IPR017441), Serine/threonine-protein kinase domain (InterPro:IPR002290), Serine/threonine-protein kinase-like domain (InterPro:IPR017442), Protein kinase-like domain (InterPro:IPR011009), Serine/threonine-protein kinase, active site (InterPro:IPR008…	Protein kinase domain | Protein kinase, ATP binding site | Protein kinase-like domain | Serine/threonine-protein kinase, active site | Serine/threonine/dual specificity protein kinase, catalytic domain	NO
AT1G11150	-1.41504	2.27864	6.83195e-11	5.85514e-09	DOWN		transposable element gene	pseudogene, similar to putative AP endonuclease/reverse transcriptase, blastp match of 30% identity and 3.2e-59 P-value to GP|21952510|gb|AAM82604.1|AF525305_2|AF525305 putative AP endonuclease/reverse transcriptase {Brassica napus}		NO
AT1G11250	1.72633	-0.278251	2.27391e-08	1.08635e-06	UP		syntaxin of plants 125	syntaxin of plants 125 (SYP125); FUNCTIONS IN: SNAP receptor activity; INVOLVED IN: intracellular protein transport, cellular membrane fusion; LOCATED IN: membrane; EXPRESSED IN: 6 plant structures; EXPRESSED DURING: L mature pollen stage, M germinated pollen stage, 4 anthesis, petal differentiation and expansion stage; CONTAINS InterPro DOMAIN/s: Target SNARE coiled-coil domain (InterPro:IPR0007…	Syntaxin, N-terminal domain | Syntaxin/epimorphin, conserved site | Target SNARE coiled-coil domain | t-SNARE	NO
AT1G11270	-0.857545	2.19837	2.86815e-05	0.000513295	DOWN		F-box and associated interaction domains-containing protein	F-box and associated interaction domains-containing protein; CONTAINS InterPro DOMAIN/s: F-box domain, cyclin-like (InterPro:IPR001810), F-box domain, Skp2-like (InterPro:IPR022364); CONTAINS InterPro DOMAIN/s: F-box domain, cyclin-like (InterPro:IPR001810), F-box domain, Skp2-like (InterPro:IPR022364), F-box associated domain, type 1 (InterPro:IPR006527); BEST Arabidopsis thaliana protein match …	F-box associated domain, type 1 | F-box associated interaction domain | F-box domain	NO
AT1G11280	-0.494531	4.838	3.55849e-05	0.000618758	DOWN		S-locus lectin protein kinase family protein	S-locus lectin protein kinase family protein; FUNCTIONS IN: in 6 functions; INVOLVED IN: protein amino acid phosphorylation, recognition of pollen; EXPRESSED IN: 23 plant structures; LOCATED IN: endomembrane system; EXPRESSED DURING: 15 growth stages; CONTAINS InterPro DOMAIN/s: Curculin-like (mannose-binding) lectin (InterPro:IPR001480), PAN-2 domain (InterPro:IPR013227), Apple-like (InterPro:IP…	Apple-like | Bulb-type lectin domain | Concanavalin A-like lectin/glucanase, subgroup | PAN-2 domain | Protein kinase domain | Protein kinase-like domain | S-locus glycoprotein | S-receptor-like serine/threonine-protein kinase | Serine-threonine/tyrosine-protein kinase catalytic domain | Serine/threonine-protein kinase, active site	NO
AT1G11300	-0.850061	1.70986	2.02452e-05	0.000381364	DOWN		protein serine/threonine kinases;protein kinases;ATP binding;sugar binding;kinases;carbohydrate binding	protein serine/threonine kinases;protein kinases;ATP binding;sugar binding;kinases;carbohydrate binding; FUNCTIONS IN: in 6 functions; INVOLVED IN: protein amino acid phosphorylation, recognition of pollen; LOCATED IN: endomembrane system; EXPRESSED IN: 12 plant structures; EXPRESSED DURING: 6 growth stages; CONTAINS InterPro DOMAIN/s: Curculin-like (mannose-binding) lectin (InterPro:IPR001480), …		NO
AT1G11320	0.460694	1.98105	0.00765888	0.0491537	UP			unknown protein; FUNCTIONS IN: molecular_function unknown; INVOLVED IN: biological_process unknown; LOCATED IN: mitochondrion, plastid; EXPRESSED IN: 7 plant structures; EXPRESSED DURING: C globular stage, F mature embryo stage, petal differentiation and expansion stage, E expanded cotyledon stage, D bilateral stage		NO
AT1G11350	0.365752	4.55391	0.00151467	0.0135355	UP		S-domain-1 13	S-domain-1 13 (SD1-13); CONTAINS InterPro DOMAIN/s: Curculin-like (mannose-binding) lectin (InterPro:IPR001480), Apple-like (InterPro:IPR003609), Protein kinase, ATP binding site (InterPro:IPR017441), PAN-2 domain (InterPro:IPR013227), Serine/threonine-protein kinase domain (InterPro:IPR002290), Serine-threonine/tyrosine-protein kinase (InterPro:IPR001245), Serine/threonine-protein kinase, active…	Apple-like | Bulb-type lectin domain | Concanavalin A-like lectin/glucanase, subgroup | PAN-2 domain | Protein kinase domain | Protein kinase, ATP binding site | Protein kinase-like domain | S-locus glycoprotein | S-receptor-like serine/threonine-protein kinase | Serine-threonine/tyrosine-protein kinase catalytic domain | Serine/threonine-protein kinase, active site	NO
AT1G11410	-0.444954	5.16506	7.44359e-05	0.00113494	DOWN		S-locus lectin protein kinase family protein	S-locus lectin protein kinase family protein; FUNCTIONS IN: in 6 functions; INVOLVED IN: protein amino acid phosphorylation, recognition of pollen; LOCATED IN: endomembrane system; EXPRESSED IN: 21 plant structures; EXPRESSED DURING: 13 growth stages; CONTAINS InterPro DOMAIN/s: Curculin-like (mannose-binding) lectin (InterPro:IPR001480), Apple-like (InterPro:IPR003609), PAN-2 domain (InterPro:IP…	Apple-like | Bulb-type lectin domain | Epidermal growth factor-like domain | PAN-2 domain | Protein kinase domain | Protein kinase-like domain | S-locus glycoprotein | S-locus receptor kinase, C-terminal | S-receptor-like serine/threonine-protein kinase | Serine-threonine/tyrosine-protein kinase catalytic domain | Serine/threonine-protein kinase, active site	NO
AT1G11440	-1.94458	2.29311	2.20455e-20	7.81595e-18	DOWN			BEST Arabidopsis thaliana protein match is: glycine-rich protein (TAIR:AT3G29075.1)		NO
AT1G11475	0.459277	4.51218	0.000105182	0.00151588	UP		RNA polymerases N / 8 kDa subunit	NRPB10; FUNCTIONS IN: DNA-directed RNA polymerase activity, DNA binding, zinc ion binding; INVOLVED IN: transcription, DNA-dependent, transcription, regulation of transcription; LOCATED IN: DNA-directed RNA polymerase V complex, DNA-directed RNA polymerase II, core complex, DNA-directed RNA polymerase IV complex; CONTAINS InterPro DOMAIN/s: RNA polymerases, N/8kDa subunit (InterPro:IPR000268), RN…	DNA-directed RNA polymerase, subunit N/Rpb10 | Homeodomain-like | RNA polymerase subunit RPB10 | RNA polymerases, subunit N, zinc binding site	NO
AT1G11600	1.39253	3.32218	1.3125e-06	3.74313e-05	UP		cytochrome P450, family 77, subfamily B, polypeptide 1	cytochrome P450, family 77, subfamily B, polypeptide 1 (CYP77B1); FUNCTIONS IN: electron carrier activity, monooxygenase activity, iron ion binding, oxygen binding, heme binding; INVOLVED IN: oxidation reduction; LOCATED IN: endomembrane system; EXPRESSED IN: 17 plant structures; EXPRESSED DURING: 8 growth stages; CONTAINS InterPro DOMAIN/s: Cytochrome P450 (InterPro:IPR001128), Cytochrome P450, …	Cytochrome P450 | Cytochrome P450, E-class, group I | Cytochrome P450, conserved site	NO
AT1G11650	0.435437	7.90134	2.62127e-06	6.73948e-05	UP		RNA-binding (RRM/RBD/RNP motifs) family protein	RBP45B; FUNCTIONS IN: RNA binding; EXPRESSED IN: 26 plant structures; EXPRESSED DURING: 16 growth stages; CONTAINS InterPro DOMAIN/s: RNA recognition motif, RNP-1 (InterPro:IPR000504), Nucleotide-binding, alpha-beta plait (InterPro:IPR012677); BEST Arabidopsis thaliana protein match is: RNA-binding protein 45A (TAIR:AT5G54900.1)	Nucleotide-binding, alpha-beta plait | RNA recognition motif domain	NO
AT1G11660	0.369384	5.19685	0.000115393	0.00163576	UP		heat shock protein 70 (Hsp 70) family protein	heat shock protein 70 (Hsp 70) family protein; FUNCTIONS IN: ATP binding; INVOLVED IN: protein folding; LOCATED IN: cellular_component unknown; EXPRESSED IN: 24 plant structures; EXPRESSED DURING: 15 growth stages; CONTAINS InterPro DOMAIN/s: Heat shock protein Hsp70 (InterPro:IPR001023), Heat shock protein 70 (InterPro:IPR013126); BEST Arabidopsis thaliana protein match is: Heat shock protein 70…	Heat shock protein 70 family | Heat shock protein 70kD, C-terminal domain | Heat shock protein 70kD, peptide-binding domain	NO
AT1G11700	-0.469237	3.69658	0.00361938	0.0272108	DOWN		Protein of unknown function, DUF584	Protein of unknown function, DUF584; FUNCTIONS IN: molecular_function unknown; INVOLVED IN: biological_process unknown; LOCATED IN: chloroplast; EXPRESSED IN: 21 plant structures; EXPRESSED DURING: 11 growth stages; CONTAINS InterPro DOMAIN/s: Protein of unknown function DUF584 (InterPro:IPR007608); BEST Arabidopsis thaliana protein match is: Protein of unknown function, DUF584 (TAIR:AT1G61930.1)	Senescence regulator S40	NO
AT1G11720	-0.2857	6.34166	0.00228688	0.0188232	DOWN		starch synthase 3	starch synthase 3 (SS3); CONTAINS InterPro DOMAIN/s: Glycogen/starch synthases, ADP-glucose type (InterPro:IPR011835), Starch synthase, catalytic domain (InterPro:IPR013534), Glycosyl transferase, group 1 (InterPro:IPR001296), Carbohydrate binding domain, family 25 (InterPro:IPR005085); FUNCTIONS IN: starch synthase activity, transferase activity, transferring glycosyl groups; BEST Arabidopsis th…	Carbohydrate binding module family 25 | Glycogen/starch synthase, ADP-glucose type | Glycosyl transferase, family 1 | Starch synthase, catalytic domain	NO
AT1G11850	0.880523	4.04738	0.000147527	0.00199312	UP			unknown protein; FUNCTIONS IN: molecular_function unknown; INVOLVED IN: biological_process unknown; LOCATED IN: endomembrane system; EXPRESSED IN: 19 plant structures; EXPRESSED DURING: 12 growth stages		NO
AT1G11950	0.625471	2.97209	0.000164184	0.00217987	UP		Transcription factor jumonji (jmjC) domain-containing protein	Transcription factor jumonji (jmjC) domain-containing protein; CONTAINS InterPro DOMAIN/s: Transcription factor jumonji/aspartyl beta-hydroxylase (InterPro:IPR003347), Transcription factor jumonji (InterPro:IPR013129); BEST Arabidopsis thaliana protein match is: transcription factor jumonji (jmjC) domain-containing protein (TAIR:AT1G62310.1)	JmjC domain	NO
AT1G12000	0.523207	5.64909	3.82242e-08	1.72577e-06	UP		Phosphofructokinase family protein	Phosphofructokinase family protein; FUNCTIONS IN: diphosphate-fructose-6-phosphate 1-phosphotransferase activity; INVOLVED IN: response to cadmium ion, glycolysis, photosynthesis; LOCATED IN: pyrophosphate-dependent phosphofructokinase complex, beta-subunit complex, cell wall, membrane; EXPRESSED IN: 24 plant structures; EXPRESSED DURING: 14 growth stages; CONTAINS InterPro DOMAIN/s: Pyrophosphat…	Phosphofructokinase | Phosphofructokinase domain | Pyrophosphate-dependent phosphofructokinase PfpB | Pyrophosphate-dependent phosphofructokinase, alpha-helical domain	NO
AT1G12120	0.286854	6.16744	0.00352124	0.0266114	UP		Plant protein of unknown function (DUF863)	Plant protein of unknown function (DUF863); CONTAINS InterPro DOMAIN/s: Protein of unknown function DUF863, plant (InterPro:IPR008581); BEST Arabidopsis thaliana protein match is: Plant protein of unknown function (DUF863) (TAIR:AT1G62530.2)	Protein of unknown function DUF863, plant	NO
AT1G12210	-0.634012	1.36124	0.00524268	0.036423	DOWN		RPS5-like 1	RPS5-like 1 (RFL1); FUNCTIONS IN: ATP binding; INVOLVED IN: N-terminal protein myristoylation, response to bacterium, defense response; LOCATED IN: cellular_component unknown; EXPRESSED IN: shoot apex, stem, embryo, sepal, stamen; EXPRESSED DURING: 4 anthesis, petal differentiation and expansion stage, D bilateral stage; CONTAINS InterPro DOMAIN/s: NB-ARC (InterPro:IPR002182), Disease resistance …	Leucine-rich repeat | NB-ARC | P-loop containing nucleoside triphosphate hydrolase	NO
AT1G12220	-0.570344	4.02095	8.89827e-06	0.000189406	DOWN		Disease resistance protein (CC-NBS-LRR class) family	RESISTANT TO P. SYRINGAE 5 (RPS5); CONTAINS InterPro DOMAIN/s: Leucine-rich repeat-containing protein (InterPro:IPR015766), NB-ARC (InterPro:IPR002182), Disease resistance protein (InterPro:IPR000767); BEST Arabidopsis thaliana protein match is: LRR and NB-ARC domains-containing disease resistance protein (TAIR:AT1G12280.1)	Leucine-rich repeat | NB-ARC | P-loop containing nucleoside triphosphate hydrolase	NO
AT1G12250	-0.342589	6.26649	0.000503706	0.00552182	DOWN		Pentapeptide repeat-containing protein	Pentapeptide repeat-containing protein; FUNCTIONS IN: molecular_function unknown; INVOLVED IN: biological_process unknown; LOCATED IN: chloroplast thylakoid membrane, chloroplast thylakoid lumen, chloroplast; LOCATED IN: thylakoid, chloroplast thylakoid membrane, chloroplast thylakoid lumen, chloroplast; EXPRESSED IN: 22 plant structures; EXPRESSED DURING: 13 growth stages; CONTAINS InterPro DOMA…	Pentapeptide repeat	NO
AT1G12270	0.368337	5.34087	0.000162351	0.00216304	UP		stress-inducible protein, putative	stress-inducible protein, putative; FUNCTIONS IN: binding; INVOLVED IN: response to stress; EXPRESSED IN: 23 plant structures; EXPRESSED DURING: 14 growth stages; CONTAINS InterPro DOMAIN/s: Heat shock chaperonin-binding (InterPro:IPR006636), Tetratricopeptide TPR-1 (InterPro:IPR001440), Tetratricopeptide-like helical (InterPro:IPR011990), Tetratricopeptide repeat-containing (InterPro:IPR013026),…	Heat shock chaperonin-binding | Tetratricopeptide TPR1 | Tetratricopeptide repeat | Tetratricopeptide repeat-containing domain | Tetratricopeptide-like helical domain	NO
AT1G12310	0.339477	5.42367	0.000550785	0.00594115	UP		Calcium-binding EF-hand family protein	Calcium-binding EF-hand family protein; FUNCTIONS IN: calcium ion binding; INVOLVED IN: biological_process unknown; LOCATED IN: plasma membrane, nucleus, cytoplasm; EXPRESSED IN: 26 plant structures; EXPRESSED DURING: 15 growth stages; CONTAINS InterPro DOMAIN/s: EF-Hand 1, calcium-binding site (InterPro:IPR018247), EF-HAND 2 (InterPro:IPR018249), EF-hand-like domain (InterPro:IPR011992), Calcium…	EF-Hand 1, calcium-binding site | EF-hand domain | EF-hand domain pair	NO
AT1G12320	-0.740302	1.00028	0.000974911	0.00948194	DOWN		Protein of unknown function (DUF1442)	Protein of unknown function (DUF1442); CONTAINS InterPro DOMAIN/s: Protein of unknown function DUF1442 (InterPro:IPR009902); BEST Arabidopsis thaliana protein match is: Protein of unknown function (DUF1442) (TAIR:AT1G62840.1)	Protein of unknown function DUF1442	NO
AT1G12460	-0.44206	3.8037	0.00317806	0.0245168	DOWN		Leucine-rich repeat protein kinase family protein	Leucine-rich repeat protein kinase family protein; FUNCTIONS IN: protein serine/threonine kinase activity, kinase activity, ATP binding; INVOLVED IN: transmembrane receptor protein tyrosine kinase signaling pathway, protein amino acid phosphorylation; LOCATED IN: plasma membrane; EXPRESSED IN: 9 plant structures; EXPRESSED DURING: 6 growth stages; CONTAINS InterPro DOMAIN/s: Protein kinase, catal…	Leucine-rich repeat | Leucine-rich repeat-containing N-terminal, type 2 | Protein kinase domain | Protein kinase-like domain	NO
AT1G12480	-0.717666	3.27032	7.22113e-06	0.00015886	DOWN		C4-dicarboxylate transporter/malic acid transport protein	OZONE-SENSITIVE 1 (OZS1); CONTAINS InterPro DOMAIN/s: C4-dicarboxylate transporter/malic acid transport protein (InterPro:IPR004695); BEST Arabidopsis thaliana protein match is: SLAC1 homologue 3 (TAIR:AT5G24030.1)	Voltage-dependent anion channel	NO
AT1G12580	0.272065	5.72654	0.00413249	0.0301596	UP		phosphoenolpyruvate carboxylase-related kinase 1	phosphoenolpyruvate carboxylase-related kinase 1 (PEPKR1); FUNCTIONS IN: protein serine/threonine kinase activity, protein kinase activity, kinase activity, ATP binding; INVOLVED IN: protein amino acid phosphorylation; LOCATED IN: cellular_component unknown; EXPRESSED IN: 22 plant structures; EXPRESSED DURING: 13 growth stages; CONTAINS InterPro DOMAIN/s: Protein kinase, ATP binding site (InterPr…	Protein kinase domain | Protein kinase, ATP binding site | Protein kinase-like domain | Serine/threonine-protein kinase, active site | Serine/threonine/dual specificity protein kinase, catalytic domain	NO
AT1G12620	-0.663965	2.56098	0.000370239	0.00430595	DOWN		Pentatricopeptide repeat (PPR) superfamily protein	Pentatricopeptide repeat (PPR) superfamily protein; CONTAINS InterPro DOMAIN/s: Pentatricopeptide repeat (InterPro:IPR002885); BEST Arabidopsis thaliana protein match is: Tetratricopeptide repeat (TPR)-like superfamily protein (TAIR:AT1G12300.1)	Pentatricopeptide repeat | Tetratricopeptide-like helical domain	NO
AT1G12650	0.316491	4.42454	0.00640808	0.0427604	UP			unknown protein; FUNCTIONS IN: molecular_function unknown; INVOLVED IN: biological_process unknown; LOCATED IN: cellular_component unknown; EXPRESSED IN: 23 plant structures; EXPRESSED DURING: 13 growth stages; CONTAINS InterPro DOMAIN/s: Protein of unknown function DUF947 (InterPro:IPR009292)	Protein of unknown function DUF947	NO
AT1G12672	-2.82455	-2.90359	0.00306568	0.0238189	DOWN			unknown protein; LOCATED IN: endomembrane system; BEST Arabidopsis thaliana protein match is: unknown protein (TAIR:AT1G12663.1)		NO
AT1G12770	0.414674	5.78295	1.77041e-05	0.000340736	UP		P-loop containing nucleoside triphosphate hydrolases superfamily protein	embryo defective 1586 (EMB1586); FUNCTIONS IN: RNA helicase activity; INVOLVED IN: plasmodesma organization, plasmodesmata-mediated intercellular transport, embryo development ending in seed dormancy; LOCATED IN: mitochondrion; EXPRESSED IN: embryo, root, flower, shoot meristem; CONTAINS InterPro DOMAIN/s: RNA helicase, DEAD-box type, Q motif (InterPro:IPR014014), DNA/RNA helicase, DEAD/DEAH box …	DEAD/DEAH box helicase domain | Helicase, C-terminal | Helicase, superfamily 1/2, ATP-binding domain | P-loop containing nucleoside triphosphate hydrolase | RNA helicase, DEAD-box type, Q motif	NO
AT1G12830	0.405565	3.89588	0.00102237	0.00984124	UP			unknown protein; FUNCTIONS IN: molecular_function unknown; INVOLVED IN: biological_process unknown; LOCATED IN: cellular_component unknown; EXPRESSED IN: 23 plant structures; EXPRESSED DURING: 13 growth stages	Cytochrome b-c1 complex, subunit 6	NO
AT1G12860	0.300237	5.81832	0.00491609	0.034582	UP		basic helix-loop-helix (bHLH) DNA-binding superfamily protein	SCREAM 2 (SCRM2); FUNCTIONS IN: DNA binding, sequence-specific DNA binding transcription factor activity; INVOLVED IN: response to freezing, guard mother cell differentiation, regulation of transcription; LOCATED IN: nucleus; EXPRESSED IN: 20 plant structures; EXPRESSED DURING: 13 growth stages; CONTAINS InterPro DOMAIN/s: Helix-loop-helix DNA-binding domain (InterPro:IPR001092), Helix-loop-helix…	ACT domain | Myc-type, basic helix-loop-helix (bHLH) domain	NO
AT1G12880	0.961733	3.8256	5.95967e-07	1.91351e-05	UP		nudix hydrolase homolog 12	nudix hydrolase homolog 12 (NUDT12); FUNCTIONS IN: hydrolase activity; INVOLVED IN: biological_process unknown; EXPRESSED IN: 23 plant structures; EXPRESSED DURING: 15 growth stages; CONTAINS InterPro DOMAIN/s: NUDIX hydrolase domain-like (InterPro:IPR015797), NUDIX hydrolase, conserved site (InterPro:IPR020084), NUDIX hydrolase domain (InterPro:IPR000086); BEST Arabidopsis thaliana protein match…	NUDIX hydrolase domain | NUDIX hydrolase domain-like | NUDIX hydrolase, conserved site	NO
AT1G12910	0.348175	5.1344	0.000625022	0.00659091	UP		Transducin/WD40 repeat-like superfamily protein	ANTHOCYANIN11 (ATAN11); CONTAINS InterPro DOMAIN/s: WD40 repeat-like-containing domain (InterPro:IPR011046), WD40 repeat 2 (InterPro:IPR019782), WD40 repeat, conserved site (InterPro:IPR019775), WD40-repeat-containing domain (InterPro:IPR017986), WD40 repeat (InterPro:IPR001680), WD40/YVTN repeat-like-containing domain (InterPro:IPR015943), WD40 repeat, subgroup (InterPro:IPR019781); BEST Arabido…	WD40 repeat | WD40 repeat, conserved site | WD40-repeat-containing domain | WD40/YVTN repeat-like-containing domain	NO
AT1G12970	0.349918	3.8478	0.00353905	0.0267205	UP		plant intracellular ras group-related LRR 3	plant intracellular ras group-related LRR 3 (PIRL3); CONTAINS InterPro DOMAIN/s: Leucine-rich repeat, typical subtype (InterPro:IPR003591), Leucine-rich repeat (InterPro:IPR001611); BEST Arabidopsis thaliana protein match is: plant intracellular ras group-related LRR 2 (TAIR:AT3G26500.1)	Leucine rich repeat 4 | Leucine-rich repeat | Leucine-rich repeat, typical subtype	NO
AT1G13030	0.712592	2.64893	8.88194e-06	0.000189217	UP		sphere organelles protein-related	sphere organelles protein-related	Coilin	NO
AT1G13080	-0.427182	5.99302	0.000109861	0.00157322	DOWN		cytochrome P450, family 71, subfamily B, polypeptide 2	cytochrome P450, family 71, subfamily B, polypeptide 2 (CYP71B2); FUNCTIONS IN: electron carrier activity, monooxygenase activity, iron ion binding, oxygen binding, heme binding; INVOLVED IN: response to cyclopentenone, heat acclimation; EXPRESSED IN: 24 plant structures; EXPRESSED DURING: 13 growth stages; CONTAINS InterPro DOMAIN/s: Cytochrome P450 (InterPro:IPR001128), Cytochrome P450, E-class…	Cytochrome P450 | Cytochrome P450, E-class, group I | Cytochrome P450, conserved site	NO
AT1G13090	-0.272237	6.26073	0.00479702	0.0338576	DOWN		cytochrome P450, family 71, subfamily B, polypeptide 28	cytochrome P450, family 71, subfamily B, polypeptide 28 (CYP71B28); FUNCTIONS IN: electron carrier activity, monooxygenase activity, iron ion binding, oxygen binding, heme binding; INVOLVED IN: oxidation reduction; EXPRESSED IN: 23 plant structures; EXPRESSED DURING: 13 growth stages; CONTAINS InterPro DOMAIN/s: Cytochrome P450 (InterPro:IPR001128), Cytochrome P450, E-class, group I (InterPro:IPR…	Cytochrome P450 | Cytochrome P450, E-class, group I | Cytochrome P450, conserved site	NO
AT1G13160	0.49316	4.19673	0.000250661	0.00310958	UP		ARM repeat superfamily protein	ARM repeat superfamily protein; FUNCTIONS IN: binding; INVOLVED IN: biological_process unknown; LOCATED IN: cellular_component unknown; EXPRESSED IN: 20 plant structures; EXPRESSED DURING: 13 growth stages; CONTAINS InterPro DOMAIN/s: Domain of unknown function, nucleolar NUC130/133, N-terminal (InterPro:IPR012977), Armadillo-type fold (InterPro:IPR016024), SDA1 (InterPro:IPR007949); BEST Arabido…	Armadillo-type fold | SDA1 domain | Sda1 | Uncharacterised domain NUC130/133, N-terminal	NO
AT1G13170	0.382761	4.52062	0.000669635	0.0069611	UP		OSBP(oxysterol binding protein)-related protein 1D	OSBP(oxysterol binding protein)-related protein 1D (ORP1D); FUNCTIONS IN: oxysterol binding; INVOLVED IN: steroid metabolic process; EXPRESSED IN: 22 plant structures; EXPRESSED DURING: 13 growth stages; CONTAINS InterPro DOMAIN/s: Pleckstrin homology-type (InterPro:IPR011993), Oxysterol-binding protein (InterPro:IPR000648), Pleckstrin homology (InterPro:IPR001849); CONTAINS InterPro DOMAIN/s: Pl…	Oxysterol-binding protein | Pleckstrin homology domain | Pleckstrin homology-like domain	NO
AT1G13330	0.717529	1.14716	0.000781911	0.0079062	UP		Arabidopsis Hop2 homolog	Arabidopsis Hop2 homolog (AHP2); CONTAINS InterPro DOMAIN/s: Tat binding protein 1-interacting (InterPro:IPR010776)	Tat binding protein 1-interacting	NO
AT1G13350	-0.55728	5.54009	7.44485e-08	3.12339e-06	DOWN	YES	Protein kinase superfamily protein	Protein kinase superfamily protein; FUNCTIONS IN: protein serine/threonine kinase activity, protein kinase activity, ATP binding; INVOLVED IN: protein amino acid phosphorylation; LOCATED IN: nucleus, cytoplasm; EXPRESSED IN: male gametophyte, cultured cell, pollen tube; EXPRESSED IN: male gametophyte, pollen tube; EXPRESSED DURING: L mature pollen stage, M germinated pollen stage; CONTAINS InterP…	Protein kinase domain | Protein kinase-like domain | Serine/threonine-protein kinase, active site | Serine/threonine/dual specificity protein kinase, catalytic domain	NO
AT1G13410	0.871235	1.08066	0.000760845	0.007742	UP		Tetratricopeptide repeat (TPR)-like superfamily protein	Tetratricopeptide repeat (TPR)-like superfamily protein; CONTAINS InterPro DOMAIN/s: Pentatricopeptide repeat (InterPro:IPR002885); BEST Arabidopsis thaliana protein match is: Tetratricopeptide repeat (TPR)-like superfamily protein (TAIR:AT4G02750.1)	Pentatricopeptide repeat | Tetratricopeptide-like helical domain	NO
AT1G13460	-0.469582	4.10298	7.37524e-05	0.00112758	DOWN		Protein phosphatase 2A regulatory B subunit family protein	Protein phosphatase 2A regulatory B subunit family protein; FUNCTIONS IN: protein phosphatase type 2A regulator activity; INVOLVED IN: signal transduction; LOCATED IN: peroxisome, protein phosphatase type 2A complex; EXPRESSED IN: 21 plant structures; EXPRESSED DURING: 12 growth stages; CONTAINS InterPro DOMAIN/s: Protein phosphatase 2A, regulatory B subunit, B56 (InterPro:IPR002554); BEST Arabid…	Armadillo-type fold | Protein phosphatase 2A, regulatory B subunit, B56	NO
AT1G13530	1.39732	1.71793	2.72179e-06	6.96072e-05	UP		Protein of unknown function (DUF1262)	Protein of unknown function (DUF1262); CONTAINS InterPro DOMAIN/s: Protein of unknown function DUF1262 (InterPro:IPR010683); BEST Arabidopsis thaliana protein match is: Protein of unknown function (DUF1262) (TAIR:AT1G13500.1)	Protein of unknown function DUF1262	NO
AT1G13590	-0.885673	0.438343	0.00174224	0.0150927	DOWN		phytosulfokine 1 precursor	phytosulfokine 1 precursor (PSK1); FUNCTIONS IN: growth factor activity; INVOLVED IN: cell growth; LOCATED IN: extracellular matrix; EXPRESSED IN: root; CONTAINS InterPro DOMAIN/s: Phytosulfokine (InterPro:IPR009438)	Phytosulfokine	NO
AT1G13670	0.712184	3.27036	0.000691965	0.00714691	UP			unknown protein		NO
AT1G13700	0.750703	4.86941	0.000145038	0.00196977	UP		6-phosphogluconolactonase 1	6-phosphogluconolactonase 1 (PGL1); FUNCTIONS IN: 6-phosphogluconolactonase activity, catalytic activity; INVOLVED IN: pentose-phosphate shunt, carbohydrate metabolic process; LOCATED IN: cellular_component unknown; EXPRESSED IN: 11 plant structures; EXPRESSED DURING: LP.06 six leaves visible, LP.04 four leaves visible, 4 anthesis, petal differentiation and expansion stage; CONTAINS InterPro DOMA…	6-phosphogluconolactonase, DevB-type | Glucosamine/galactosamine-6-phosphate isomerase	NO
AT1G13710	1.41651	0.931365	1.42291e-06	4.00377e-05	UP		cytochrome P450, family 78, subfamily A, polypeptide 5	cytochrome P450, family 78, subfamily A, polypeptide 5 (CYP78A5); FUNCTIONS IN: electron carrier activity, monooxygenase activity, iron ion binding, oxygen binding, heme binding; INVOLVED IN: in 7 processes; LOCATED IN: endoplasmic reticulum; EXPRESSED IN: 10 plant structures; EXPRESSED DURING: F mature embryo stage, petal differentiation and expansion stage, E expanded cotyledon stage, D bilater…	Cytochrome P450 | Cytochrome P450, E-class, group I | Cytochrome P450, conserved site	NO
AT1G13770	0.561631	4.25437	3.87624e-06	9.29883e-05	UP		Protein of unknown function, DUF647	ROOT UV-B SENSITIVE 3 (RUS3); FUNCTIONS IN: molecular_function unknown; INVOLVED IN: biological_process unknown; LOCATED IN: cellular_component unknown; CONTAINS InterPro DOMAIN/s: Protein of unknown function DUF647 (InterPro:IPR006968); BEST Arabidopsis thaliana protein match is: Protein of unknown function, DUF647 (TAIR:AT3G45890.1)	Vitamin B6 photo-protection and homoeostasis	NO
AT1G13790	1.16184	1.974	1.86704e-11	1.78647e-09	UP		XH/XS domain-containing protein	XH/XS domain-containing protein; CONTAINS InterPro DOMAIN/s: Domain of unknown function XS (InterPro:IPR005380), Domain of unknown function XH (InterPro:IPR005379), Domain of unknown function, putative Zinc finger, XS/XH (InterPro:IPR005381); BEST Arabidopsis thaliana protein match is: XH/XS domain-containing protein (TAIR:AT3G48670.2)	Uncharacterised domain XH | XS domain | Zinc finger-XS domain	NO
AT1G13810	0.549796	2.32728	0.000881681	0.00873409	UP		Restriction endonuclease, type II-like superfamily protein	Restriction endonuclease, type II-like superfamily protein; FUNCTIONS IN: DNA binding, nuclease activity; INVOLVED IN: biological_process unknown; LOCATED IN: cellular_component unknown; EXPRESSED IN: 23 plant structures; EXPRESSED DURING: 13 growth stages; CONTAINS InterPro DOMAIN/s: YqaJ viral recombinase family (InterPro:IPR019080), Exonuclease, phage-type/RecB, C-terminal (InterPro:IPR011604)…		NO
AT1G13820	-0.606265	5.79585	1.22713e-09	8.26616e-08	DOWN		alpha/beta-Hydrolases superfamily protein	alpha/beta-Hydrolases superfamily protein; FUNCTIONS IN: hydrolase activity, catalytic activity; CONTAINS InterPro DOMAIN/s: Epoxide hydrolase-like (InterPro:IPR000639), Alpha/beta hydrolase fold-1 (InterPro:IPR000073); BEST Arabidopsis thaliana protein match is: alpha/beta-Hydrolases superfamily protein (TAIR:AT5G39220.1)	Alpha/Beta hydrolase fold | Alpha/beta hydrolase fold-1 | Epoxide hydrolase-like	NO
AT1G13940	0.383327	5.07467	0.000205189	0.00262674	UP		Plant protein of unknown function (DUF863)	Plant protein of unknown function (DUF863); CONTAINS InterPro DOMAIN/s: Protein of unknown function DUF863, plant (InterPro:IPR008581); BEST Arabidopsis thaliana protein match is: Plant protein of unknown function (DUF863) (TAIR:AT1G69360.1)	Protein of unknown function DUF863, plant	NO
AT1G13950	-0.880729	2.34439	3.99447e-06	9.55524e-05	DOWN		eukaryotic elongation factor 5A-1	eukaryotic elongation factor 5A-1 (ELF5A-1); FUNCTIONS IN: ribosome binding, RNA binding, translation elongation factor activity, translation initiation factor activity; INVOLVED IN: translational initiation, xylem development; LOCATED IN: cellular_component unknown; EXPRESSED IN: 18 plant structures; EXPRESSED DURING: 11 growth stages; CONTAINS InterPro DOMAIN/s: Nucleic acid-binding, OB-fold (I…	Nucleic acid-binding, OB-fold | Ribosomal protein L2 domain 2 | Translation elongation factor IF5A | Translation elongation factor, IF5A C-terminal | Translation elongation factor, IF5A, hypusine site | Translation protein SH3-like domain	NO
AT1G13970	-0.612552	1.47486	0.00618273	0.041565	DOWN		Protein of unknown function (DUF1336)	Protein of unknown function (DUF1336); FUNCTIONS IN: molecular_function unknown; INVOLVED IN: N-terminal protein myristoylation; EXPRESSED IN: 20 plant structures; EXPRESSED DURING: 10 growth stages; CONTAINS InterPro DOMAIN/s: Protein of unknown function DUF1336 (InterPro:IPR009769); BEST Arabidopsis thaliana protein match is: Protein of unknown function (DUF1336) (TAIR:AT3G29180.2)	Domain of unknown function DUF1336	NO
AT1G13990	-0.517635	6.13063	5.83889e-06	0.000132396	DOWN			unknown protein; FUNCTIONS IN: molecular_function unknown; INVOLVED IN: biological_process unknown; LOCATED IN: chloroplast; EXPRESSED IN: 23 plant structures; EXPRESSED DURING: 13 growth stages; CONTAINS InterPro DOMAIN/s: Protein of unknown function DUF3110 (InterPro:IPR021503)	Protein of unknown function DUF3110	NO
AT1G14030	-0.330522	5.80521	0.000595156	0.00633548	DOWN		Rubisco methyltransferase family protein	Rubisco methyltransferase family protein; FUNCTIONS IN: [ribulose-bisphosphate carboxylase]-lysine N-methyltransferase activity; LOCATED IN: chloroplast, chloroplast stroma; EXPRESSED IN: 20 plant structures; EXPRESSED DURING: 13 growth stages; CONTAINS InterPro DOMAIN/s: Rubisco methyltransferase (InterPro:IPR011192), SET domain (InterPro:IPR001214), Rubisco LSMT substrate-binding (InterPro:IPR0…	Rubisco LSMT methyltransferase, plant | Rubisco LSMT, substrate-binding domain | SET domain	NO
AT1G14120	-0.865335	2.84018	1.5376e-05	0.000301794	DOWN		2-oxoglutarate (2OG) and Fe(II)-dependent oxygenase superfamily protein	2-oxoglutarate (2OG) and Fe(II)-dependent oxygenase superfamily protein; FUNCTIONS IN: oxidoreductase activity, acting on paired donors, with incorporation or reduction of molecular oxygen, 2-oxoglutarate as one donor, and incorporation of one atom each of oxygen into both donors, oxidoreductase activity; INVOLVED IN: biological_process unknown; LOCATED IN: cellular_component unknown; EXPRESSED I…	Isopenicillin N synthase-like | Non-haem dioxygenase N-terminal domain | Oxoglutarate/iron-dependent dioxygenase	NO
AT1G14130	-0.518496	2.58823	0.00190739	0.0162476	DOWN		2-oxoglutarate (2OG) and Fe(II)-dependent oxygenase superfamily protein	2-oxoglutarate (2OG) and Fe(II)-dependent oxygenase superfamily protein; FUNCTIONS IN: oxidoreductase activity, acting on paired donors, with incorporation or reduction of molecular oxygen, 2-oxoglutarate as one donor, and incorporation of one atom each of oxygen into both donors, oxidoreductase activity; INVOLVED IN: biological_process unknown; LOCATED IN: nucleus; EXPRESSED IN: 23 plant structu…	Isopenicillin N synthase-like | Non-haem dioxygenase N-terminal domain | Oxoglutarate/iron-dependent dioxygenase	NO
AT1G14150	-0.745641	5.77945	1.85412e-12	2.14601e-10	DOWN		PsbQ-like 2	PsbQ-like 2 (PQL2); FUNCTIONS IN: electron transporter, transferring electrons within the cyclic electron transport pathway of photosynthesis activity; INVOLVED IN: photosynthetic electron transport chain; LOCATED IN: in 6 components; EXPRESSED IN: 22 plant structures; EXPRESSED DURING: 13 growth stages; CONTAINS InterPro DOMAIN/s: Photosystem II oxygen evolving complex protein PsbQ (InterPro:IPR…		NO
AT1G14180	0.513758	2.08197	0.00414528	0.0302216	UP		RING/U-box superfamily protein	RING/U-box superfamily protein; FUNCTIONS IN: zinc ion binding; INVOLVED IN: biological_process unknown; LOCATED IN: endomembrane system; EXPRESSED IN: 10 plant structures; EXPRESSED DURING: 6 growth stages; CONTAINS InterPro DOMAIN/s: Zinc finger, RING-type (InterPro:IPR001841); BEST Arabidopsis thaliana protein match is: RING/U-box superfamily protein (TAIR:AT5G18260.1)	Zinc finger, RING-type | Zinc finger, RING/FYVE/PHD-type	NO
AT1G14290	0.370816	4.54562	0.00721628	0.0468332	UP		sphingoid base hydroxylase 2	sphingoid base hydroxylase 2 (SBH2); CONTAINS InterPro DOMAIN/s: Fatty acid hydroxylase (InterPro:IPR006694); BEST Arabidopsis thaliana protein match is: sphingoid base hydroxylase 1 (TAIR:AT1G69640.1)	Fatty acid hydroxylase	NO
AT1G14300	0.458711	3.76563	0.0031422	0.0242898	UP		ARM repeat superfamily protein	ARM repeat superfamily protein; FUNCTIONS IN: binding; INVOLVED IN: biological_process unknown; LOCATED IN: cellular_component unknown; EXPRESSED IN: 22 plant structures; EXPRESSED DURING: 13 growth stages; CONTAINS InterPro DOMAIN/s: Uncharacterised protein family UPF0507 (InterPro:IPR007205), Armadillo-like helical (InterPro:IPR011989), Armadillo-type fold (InterPro:IPR016024), Uncharacterised …	Armadillo-like helical | Armadillo-type fold | FAM203 C-terminal | FAM203 N-terminal	NO
AT1G14320	0.402669	8.27687	2.41108e-05	0.000439912	UP		Ribosomal protein L16p/L10e family protein	SUPPRESSOR OF ACAULIS 52 (SAC52); FUNCTIONS IN: structural constituent of ribosome; INVOLVED IN: cellular response to UV-B, translation; LOCATED IN: cytosolic ribosome, cytosolic large ribosomal subunit, plasma membrane, large ribosomal subunit; LOCATED IN: in 7 components; EXPRESSED IN: 25 plant structures; EXPRESSED IN: 27 plant structures; EXPRESSED DURING: 15 growth stages; CONTAINS InterPro …	Ribosomal protein L10e | Ribosomal protein L10e, conserved site | Ribosomal protein L10e/L16	NO
AT1G14345	-0.417054	6.12301	6.71932e-05	0.00104302	DOWN		NAD(P)-linked oxidoreductase superfamily protein	NAD(P)-linked oxidoreductase superfamily protein; FUNCTIONS IN: oxidoreductase activity; INVOLVED IN: oxidation reduction; LOCATED IN: chloroplast thylakoid membrane, chloroplast, membrane; EXPRESSED IN: 21 plant structures; EXPRESSED DURING: 13 growth stages; CONTAINS InterPro DOMAIN/s: Aldo/keto reductase (InterPro:IPR001395)	Domain of unknown function DUF304	NO
AT1G14360	0.519619	4.48541	0.0010401	0.00997479	UP		UDP-galactose transporter 3	UDP-galactose transporter 3 (UTR3); FUNCTIONS IN: pyrimidine nucleotide sugar transmembrane transporter activity; INVOLVED IN: transmembrane transport; LOCATED IN: endomembrane system; EXPRESSED IN: 24 plant structures; EXPRESSED DURING: 15 growth stages; CONTAINS InterPro DOMAIN/s: UAA transporter (InterPro:IPR013657); BEST Arabidopsis thaliana protein match is: UDP-galactose transporter 1 (TAIR…	UAA transporter	NO
AT1G14440	0.63585	4.28169	5.27878e-06	0.000121196	UP		homeobox protein 31	homeobox protein 31 (HB31); FUNCTIONS IN: DNA binding, sequence-specific DNA binding transcription factor activity; INVOLVED IN: regulation of transcription; LOCATED IN: cellular_component unknown; EXPRESSED IN: 17 plant structures; EXPRESSED DURING: 11 growth stages; CONTAINS InterPro DOMAIN/s: Homeobox domain, ZF-HD class (InterPro:IPR006455), ZF-HD homeobox protein, Cys/His-rich dimerisation d…	Homeodomain, ZF-HD class | Homeodomain-like | ZF-HD homeobox protein, Cys/His-rich dimerisation domain	NO
AT1G14530	0.603535	2.67934	0.000237376	0.00296883	UP		Protein of unknown function (DUF1084)	TOM THREE HOMOLOG 1 (THH1); CONTAINS InterPro DOMAIN/s: Protein of unknown function DUF1084 (InterPro:IPR009457); BEST Arabidopsis thaliana protein match is: tobamovirus multiplication protein 3 (TAIR:AT2G02180.1)	Domain of unknown function DUF1084	NO
AT1G14580	0.315796	5.19712	0.00481048	0.0339313	UP		C2H2-like zinc finger protein	C2H2-like zinc finger protein; FUNCTIONS IN: sequence-specific DNA binding transcription factor activity, zinc ion binding, nucleic acid binding; LOCATED IN: intracellular; EXPRESSED IN: 7 plant structures; EXPRESSED DURING: LP.04 four leaves visible, LP.10 ten leaves visible, LP.02 two leaves visible, 4 leaf senescence stage; CONTAINS InterPro DOMAIN/s: Zinc finger, C2H2-like (InterPro:IPR015880…	Zinc finger C2H2-type/integrase DNA-binding domain | Zinc finger, C2H2 | Zinc finger, C2H2-like	NO
AT1G14620	0.75418	3.67486	2.05586e-07	7.56759e-06	UP		decoy	DECOY (DECOY); FUNCTIONS IN: molecular_function unknown; INVOLVED IN: biological_process unknown; LOCATED IN: cellular_component unknown; EXPRESSED IN: 22 plant structures; EXPRESSED DURING: 13 growth stages; CONTAINS InterPro DOMAIN/s: Ribosomal protein L46 (InterPro:IPR021757)	Ribosomal protein L46	NO
AT1G14640	1.38085	3.06306	1.42125e-18	4.12665e-16	UP	YES	SWAP (Suppressor-of-White-APricot)/surp domain-containing protein	SWAP (Suppressor-of-White-APricot)/surp domain-containing protein; FUNCTIONS IN: RNA binding; INVOLVED IN: RNA processing; EXPRESSED IN: male gametophyte, flower, seed, pollen tube; EXPRESSED DURING: L mature pollen stage, M germinated pollen stage, 4 anthesis, E expanded cotyledon stage; CONTAINS InterPro DOMAIN/s: SWAP/Surp (InterPro:IPR000061), Pre-mRNA splicing factor PRP21 like protein (Inte…	Pre-mRNA splicing factor PRP21-like protein | SWAP/Surp | Ubiquitin-related domain	NO
AT1G14642	1.10495	-0.792323	0.00346532	0.0262813	UP			unknown protein; FUNCTIONS IN: molecular_function unknown; INVOLVED IN: biological_process unknown; LOCATED IN: cellular_component unknown		NO
AT1G14650	0.301724	6.22148	0.00257696	0.0206986	UP	YES	SWAP (Suppressor-of-White-APricot)/surp domain-containing protein / ubiquitin family protein	SWAP (Suppressor-of-White-APricot)/surp domain-containing protein / ubiquitin family protein; FUNCTIONS IN: RNA binding; INVOLVED IN: RNA processing; EXPRESSED IN: 24 plant structures; EXPRESSED DURING: 14 growth stages; CONTAINS InterPro DOMAIN/s: SWAP/Surp (InterPro:IPR000061), Ubiquitin (InterPro:IPR000626), Pre-mRNA splicing factor PRP21 like protein (InterPro:IPR022030), Ubiquitin supergroup…	Pre-mRNA splicing factor PRP21-like protein | SWAP/Surp | Ubiquitin-like | Ubiquitin-related domain	NO
AT1G14680	0.845551	0.533814	0.000340058	0.00403009	UP			unknown protein; BEST Arabidopsis thaliana protein match is: unknown protein (TAIR:AT4G09060.1)		NO
AT1G14685	0.320961	5.38558	0.000963235	0.00938464	UP		basic pentacysteine 2	basic pentacysteine 2 (BPC2); CONTAINS InterPro DOMAIN/s: GAGA binding-like (InterPro:IPR010409); BEST Arabidopsis thaliana protein match is: basic pentacysteine1 (TAIR:AT2G01930.2)	GAGA-binding transcriptional activator	NO
AT1G14700	0.578277	6.02409	1.5276e-05	0.000300532	UP		purple acid phosphatase 3	purple acid phosphatase 3 (PAP3); CONTAINS InterPro DOMAIN/s: Metallophosphoesterase (InterPro:IPR004843); FUNCTIONS IN: protein serine/threonine phosphatase activity, acid phosphatase activity; BEST Arabidopsis thaliana protein match is: purple acid phosphatase 8 (TAIR:AT2G01890.1); LOCATED IN: vacuole; EXPRESSED IN: 22 plant structures; EXPRESSED DURING: 12 growth stages	Acid phosphatase, type 5 | Calcineurin-like phosphoesterase domain, apaH type | Metallo-dependent phosphatase-like	NO
AT1G14710	0.394025	5.79735	4.59547e-05	0.000764627	UP		hydroxyproline-rich glycoprotein family protein	hydroxyproline-rich glycoprotein family protein; BEST Arabidopsis thaliana protein match is: oxidoreductase, 2OG-Fe(II) oxygenase family protein (TAIR:AT4G02940.1)	Alpha-ketoglutarate-dependent dioxygenase AlkB-like	NO
AT1G14770	0.579924	2.90113	0.000940442	0.0092025	UP		RING/FYVE/PHD zinc finger superfamily protein	RING/FYVE/PHD zinc finger superfamily protein; FUNCTIONS IN: zinc ion binding; INVOLVED IN: biological_process unknown; LOCATED IN: cellular_component unknown; EXPRESSED IN: 13 plant structures; EXPRESSED DURING: 7 growth stages; CONTAINS InterPro DOMAIN/s: Zinc finger, PHD-type, conserved site (InterPro:IPR019786), Zinc finger, FYVE/PHD-type (InterPro:IPR011011); BEST Arabidopsis thaliana protei…	Zinc finger, FYVE/PHD-type | Zinc finger, PHD-type, conserved site | Zinc finger, RING/FYVE/PHD-type	NO
AT1G14810	0.484398	5.28904	7.1164e-07	2.21933e-05	UP		semialdehyde dehydrogenase family protein	semialdehyde dehydrogenase family protein; FUNCTIONS IN: oxidoreductase activity, acting on the aldehyde or oxo group of donors, NAD or NADP as acceptor, aspartate-semialdehyde dehydrogenase activity; INVOLVED IN: cellular amino acid biosynthetic process, oxidation reduction, threonine biosynthetic process, methionine biosynthetic process, cellular amino acid metabolic process; LOCATED IN: mitoch…	Aspartate-semialdehyde dehydrogenase | Aspartate-semialdehyde dehydrogenase, beta-type | NAD(P)-binding domain | Semialdehyde dehydrogenase, NAD-binding | Semialdehyde dehydrogenase, dimerisation domain	NO
AT1G14850	0.466909	4.96892	1.34212e-05	0.000269072	UP		nucleoporin 155	nucleoporin 155 (NUP155); FUNCTIONS IN: nucleocytoplasmic transporter activity; INVOLVED IN: nucleocytoplasmic transport; LOCATED IN: nucleolus, plasma membrane, chloroplast, nuclear pore; EXPRESSED IN: 25 plant structures; EXPRESSED DURING: 13 growth stages; CONTAINS InterPro DOMAIN/s: Nucleoporin, Nup133/Nup155-like, N-terminal (InterPro:IPR014908), Nucleoporin, Nup155-like (InterPro:IPR004870)…	Nucleoporin, Nup133/Nup155-like, C-terminal | Nucleoporin, Nup133/Nup155-like, N-terminal | Nucleoporin, Nup155-like	NO
AT1G14890	0.786125	6.52971	3.29378e-06	8.13924e-05	UP		Plant invertase/pectin methylesterase inhibitor superfamily protein	Plant invertase/pectin methylesterase inhibitor superfamily protein; FUNCTIONS IN: enzyme inhibitor activity, pectinesterase inhibitor activity, pectinesterase activity; INVOLVED IN: biological_process unknown; EXPRESSED IN: 22 plant structures; EXPRESSED DURING: 13 growth stages; CONTAINS InterPro DOMAIN/s: Pectinesterase inhibitor (InterPro:IPR006501); BEST Arabidopsis thaliana protein match is…	Pectinesterase inhibitor domain	NO
AT1G14900	0.559662	5.61094	8.92196e-05	0.00132146	UP		high mobility group A	high mobility group A (HMGA); FUNCTIONS IN: DNA binding; INVOLVED IN: regulation of transcription, DNA-dependent, nucleosome assembly; LOCATED IN: cytosol, nuclear chromatin, nucleus; EXPRESSED IN: 19 plant structures; EXPRESSED DURING: 10 growth stages; CONTAINS InterPro DOMAIN/s: Winged helix-turn-helix transcription repressor DNA-binding (InterPro:IPR011991), A.T hook-like (InterPro:IPR020478)…	AT hook, DNA-binding motif | AT hook-like | High mobility group, HMG-I/HMG-Y | Linker histone H1/H5, domain H15 | Winged helix-turn-helix DNA-binding domain	NO
AT1G14970	0.543395	2.58668	0.00173093	0.0150063	UP		O-fucosyltransferase family protein	O-fucosyltransferase family protein; CONTAINS InterPro DOMAIN/s: GDP-fucose protein O-fucosyltransferase (InterPro:IPR019378); BEST Arabidopsis thaliana protein match is: O-fucosyltransferase family protein (TAIR:AT2G01480.1)	GDP-fucose protein O-fucosyltransferase | O-fucosyltransferase, plant	NO
AT1G14980	0.829603	5.60184	3.84646e-16	8.5232e-14	UP		chaperonin 10	chaperonin 10 (CPN10); FUNCTIONS IN: copper ion binding, chaperone binding; INVOLVED IN: protein folding, response to heat; LOCATED IN: mitochondrion; EXPRESSED IN: 23 plant structures; EXPRESSED DURING: 13 growth stages; CONTAINS InterPro DOMAIN/s: Chaperonin Cpn10 (InterPro:IPR020818), GroES-like (InterPro:IPR011032), Chaperonin Cpn10, conserved site (InterPro:IPR018369), Chaperonin Cpn10, subg…	Chaperonin Cpn10 | Chaperonin Cpn10, conserved site | GroES (chaperonin 10)-like	NO
AT1G15000	0.446857	3.54305	0.00551585	0.0379839	UP		serine carboxypeptidase-like 50	serine carboxypeptidase-like 50 (scpl50); FUNCTIONS IN: serine-type carboxypeptidase activity; INVOLVED IN: proteolysis; LOCATED IN: vacuole; EXPRESSED IN: 22 plant structures; EXPRESSED DURING: 13 growth stages; CONTAINS InterPro DOMAIN/s: Peptidase S10, serine carboxypeptidase (InterPro:IPR001563), Peptidase S10, serine carboxypeptidase, active site (InterPro:IPR018202); BEST Arabidopsis thalia…	Alpha/Beta hydrolase fold | Peptidase S10, serine carboxypeptidase | Peptidase S10, serine carboxypeptidase, active site	NO
AT1G15150	-1.84939	-1.96694	0.00449382	0.0322034	DOWN		MATE efflux family protein	MATE efflux family protein; FUNCTIONS IN: antiporter activity, drug transmembrane transporter activity, transporter activity; INVOLVED IN: drug transmembrane transport, transmembrane transport; LOCATED IN: membrane; CONTAINS InterPro DOMAIN/s: MATE family transporter related protein (InterPro:IPR015521), Multi antimicrobial extrusion protein MatE (InterPro:IPR002528); BEST Arabidopsis thaliana pr…	Multi antimicrobial extrusion protein	NO
AT1G15165	-0.690557	2.23154	0.000526713	0.00573004	DOWN		RING/FYVE/PHD zinc finger superfamily protein	RING/FYVE/PHD zinc finger superfamily protein; FUNCTIONS IN: ubiquitin-protein ligase activity; INVOLVED IN: protein ubiquitination; LOCATED IN: ubiquitin ligase complex; CONTAINS InterPro DOMAIN/s: U box domain (InterPro:IPR003613); BEST Arabidopsis thaliana protein match is: ARM repeat superfamily protein (TAIR:AT1G67530.2)	U box domain | Zinc finger, RING/FYVE/PHD-type	NO
AT1G15170	-0.450342	3.40727	0.00553213	0.0380618	DOWN		MATE efflux family protein	MATE efflux family protein; FUNCTIONS IN: antiporter activity, drug transmembrane transporter activity, transporter activity; INVOLVED IN: drug transmembrane transport, transmembrane transport; LOCATED IN: chloroplast, membrane; EXPRESSED IN: 17 plant structures; EXPRESSED DURING: 9 growth stages; CONTAINS InterPro DOMAIN/s: MATE family transporter related protein (InterPro:IPR015521), Multi anti…	Multi antimicrobial extrusion protein	NO
AT1G15200	0.340071	5.90784	0.000991829	0.00961331	UP		protein-protein interaction regulator family protein	protein-protein interaction regulator family protein; FUNCTIONS IN: molecular_function unknown; INVOLVED IN: biological_process unknown; LOCATED IN: cellular_component unknown; EXPRESSED IN: 22 plant structures; EXPRESSED DURING: 13 growth stages; CONTAINS InterPro DOMAIN/s: Pinin/SDK/memA protein (InterPro:IPR006786)	Pinin/SDK/MemA protein	NO
AT1G15215	0.521941	3.10863	0.000179856	0.00235435	UP			BEST Arabidopsis thaliana protein match is: sequence-specific DNA binding transcription factors;sequence-specific DNA binding (TAIR:AT3G18380.1)		NO
AT1G15230	0.334133	4.64459	0.00586669	0.0398218	UP			unknown protein; FUNCTIONS IN: molecular_function unknown; INVOLVED IN: biological_process unknown; LOCATED IN: cellular_component unknown; EXPRESSED IN: 24 plant structures; EXPRESSED DURING: 15 growth stages		NO
AT1G15250	0.602275	3.68693	5.84129e-06	0.000132396	UP		Zinc-binding ribosomal protein family protein	Zinc-binding ribosomal protein family protein; FUNCTIONS IN: structural constituent of ribosome; INVOLVED IN: translation, ribosome biogenesis; LOCATED IN: ribosome, cytosolic large ribosomal subunit; EXPRESSED IN: 20 plant structures; EXPRESSED DURING: 13 growth stages; CONTAINS InterPro DOMAIN/s: Ribosomal protein L37e, conserved site (InterPro:IPR018267), Ribosomal protein, zinc-binding domain…	Ribosomal protein L37ae/L37e | Ribosomal protein L37e | Ribosomal protein L37e, conserved site | Zinc-binding ribosomal protein	NO
AT1G15260	-0.459323	4.83051	0.000408958	0.00464087	DOWN			unknown protein; BEST Arabidopsis thaliana protein match is: unknown protein (TAIR:AT3G16070.1)		NO
AT1G15300	0.83027	2.27405	1.34636e-06	3.81385e-05	UP		transposable element gene	hAT-like transposase family (hobo/Ac/Tam3), has a 5.1e-59 P-value blast match to GB:CAA29005 ORFa of Maize Ac (hAT-element) (Zea mays)	HAT dimerisation domain, C-terminal | Ribonuclease H-like domain | hAT-like transposase, RNase-H fold	NO
AT1G15405	2.96269	2.70594	2.42403e-50	8.16438e-47	UP		other RNA			NO
AT1G15420	0.675366	3.63895	1.7549e-07	6.58938e-06	UP			CONTAINS InterPro DOMAIN/s: Small-subunit processome, Utp12 (InterPro:IPR007148)	Small-subunit processome, Utp12	NO
AT1G15440	0.65831	3.60011	8.47812e-06	0.000181418	UP		periodic tryptophan protein 2	periodic tryptophan protein 2 (PWP2); FUNCTIONS IN: nucleotide binding; INVOLVED IN: biological_process unknown; LOCATED IN: CUL4 RING ubiquitin ligase complex; EXPRESSED IN: 24 plant structures; EXPRESSED DURING: 13 growth stages; CONTAINS InterPro DOMAIN/s: WD40 repeat 2 (InterPro:IPR019782), WD40 repeat, conserved site (InterPro:IPR019775), WD40 repeat (InterPro:IPR001680), Small-subunit proce…	G-protein beta WD-40 repeat | Periodic tryptophan protein 2 | Quinonprotein alcohol dehydrogenase-like superfamily | Small-subunit processome, Utp12 | WD40 repeat | WD40 repeat, conserved site | WD40-repeat-containing domain | WD40/YVTN repeat-like-containing domain	NO
AT1G15480	1.05304	2.62819	1.64083e-08	8.22395e-07	UP		Tetratricopeptide repeat (TPR)-like superfamily protein	Tetratricopeptide repeat (TPR)-like superfamily protein; CONTAINS InterPro DOMAIN/s: Pentatricopeptide repeat (InterPro:IPR002885); BEST Arabidopsis thaliana protein match is: PENTATRICOPEPTIDE REPEAT 596 (TAIR:AT1G80270.3)	Pentatricopeptide repeat | Tetratricopeptide-like helical domain	NO
AT1G15570	0.71908	3.63018	4.78593e-06	0.000111554	UP		CYCLIN A2;3	CYCLIN A2;3 (CYCA2;3); CONTAINS InterPro DOMAIN/s: Cyclin, C-terminal (InterPro:IPR004367), Cyclin (InterPro:IPR006670), G2/mitotic-specific cyclin A (InterPro:IPR015453), Cyclin-like (InterPro:IPR011028), Cyclin-related (InterPro:IPR013763), Cyclin, N-terminal (InterPro:IPR006671), Cyclin, A/B/D/E (InterPro:IPR014400); BEST Arabidopsis thaliana protein match is: Cyclin A2;4 (TAIR:AT1G80370.1)	Cyclin A, plant | Cyclin A/B/D/E/F | Cyclin, C-terminal domain | Cyclin, N-terminal | Cyclin-like	NO
AT1G15580	-0.896828	0.0231872	0.00405725	0.0297458	DOWN		indole-3-acetic acid inducible 5	indole-3-acetic acid inducible 5 (IAA5); FUNCTIONS IN: sequence-specific DNA binding transcription factor activity; INVOLVED IN: response to auxin stimulus, response to cyclopentenone, response to brassinosteroid stimulus; LOCATED IN: nucleus; EXPRESSED IN: flower; EXPRESSED DURING: petal differentiation and expansion stage; CONTAINS InterPro DOMAIN/s: Aux/IAA-ARF-dimerisation (InterPro:IPR011525…	AUX/IAA protein | Aux/IAA-ARF-dimerisation	NO
AT1G15660	0.920838	4.04768	2.21692e-14	3.77112e-12	UP		centromere protein C	centromere protein C (CENP-C)	Centromere protein C/Mif2/cnp3	NO
AT1G15870	1.08847	-0.293496	0.00247185	0.0200372	UP		Mitochondrial glycoprotein family protein	Mitochondrial glycoprotein family protein; FUNCTIONS IN: molecular_function unknown; INVOLVED IN: biological_process unknown; LOCATED IN: mitochondrial matrix; EXPRESSED IN: 13 plant structures; EXPRESSED DURING: 7 growth stages; CONTAINS InterPro DOMAIN/s: Mitochondrial glycoprotein (InterPro:IPR003428); BEST Arabidopsis thaliana protein match is: Mitochondrial glycoprotein family protein (TAIR:…	Mitochondrial glycoprotein	NO
AT1G15910	0.406456	4.82872	0.000514462	0.00561154	UP		XH/XS domain-containing protein	XH/XS domain-containing protein; CONTAINS InterPro DOMAIN/s: Domain of unknown function XS (InterPro:IPR005380), Domain of unknown function XH (InterPro:IPR005379), Domain of unknown function, putative Zinc finger, XS/XH (InterPro:IPR005381); BEST Arabidopsis thaliana protein match is: XH/XS domain-containing protein (TAIR:AT4G00380.1)	Uncharacterised domain XH | XS domain | Zinc finger-XS domain	NO
AT1G15930	0.437385	7.04972	3.41184e-05	0.00059572	UP		Ribosomal protein L7Ae/L30e/S12e/Gadd45 family protein	Ribosomal protein L7Ae/L30e/S12e/Gadd45 family protein; FUNCTIONS IN: structural constituent of ribosome; INVOLVED IN: response to cadmium ion, response to salt stress, translation; LOCATED IN: cytosolic small ribosomal subunit, cytosolic ribosome; EXPRESSED IN: 23 plant structures; EXPRESSED DURING: 13 growth stages; CONTAINS InterPro DOMAIN/s: Ribosomal protein S12e (InterPro:IPR000530), Riboso…	50S ribosomal protein L30e-like | Ribosomal protein L7Ae/L30e/S12e/Gadd45 | Ribosomal protein S12e	NO
AT1G15980	-0.504656	8.02332	6.24568e-07	1.98454e-05	DOWN		NDH-dependent cyclic electron flow 1	NDH-dependent cyclic electron flow 1 (NDF1); INVOLVED IN: photosynthetic electron transport in photosystem I; LOCATED IN: chloroplast thylakoid membrane, chloroplast, NAD(P)H dehydrogenase complex (plastoquinone); EXPRESSED IN: 21 plant structures; EXPRESSED DURING: 13 growth stages		NO
AT1G16000	0.529157	2.44082	0.00270463	0.0214943	UP			unknown protein; BEST Arabidopsis thaliana protein match is: unknown protein (TAIR:AT1G80890.1)		NO
AT1G16022	1.44477	-1.53691	0.00631941	0.0423065	UP			unknown protein; FUNCTIONS IN: molecular_function unknown; INVOLVED IN: biological_process unknown; LOCATED IN: endomembrane system		NO
AT1G16080	0.319715	6.98591	0.00329888	0.0252867	UP			unknown protein; LOCATED IN: apoplast, chloroplast stroma, chloroplast, chloroplast envelope; EXPRESSED IN: 23 plant structures; EXPRESSED DURING: 14 growth stages	Dehydrogenase, multihelical	NO
AT1G16090	-5.31969	1.80314	6.61536e-68	7.42707e-64	DOWN		wall associated kinase-like 7	wall associated kinase-like 7 (WAKL7); FUNCTIONS IN: protein serine/threonine kinase activity; LOCATED IN: endomembrane system, integral to membrane; EXPRESSED IN: 12 plant structures; EXPRESSED DURING: 7 growth stages; CONTAINS InterPro DOMAIN/s: Wall-associated kinase (InterPro:IPR013695); BEST Arabidopsis thaliana protein match is: Wall-associated kinase family protein (TAIR:AT1G79670.1)	Wall-associated receptor kinase | Wall-associated receptor kinase galacturonan-binding domain	NO
AT1G16110	-0.432017	3.81666	0.00750744	0.0483292	DOWN		wall associated kinase-like 6	wall associated kinase-like 6 (WAKL6); FUNCTIONS IN: kinase activity; INVOLVED IN: protein amino acid phosphorylation; LOCATED IN: endomembrane system, integral to membrane; CONTAINS InterPro DOMAIN/s: Wall-associated kinase (InterPro:IPR013695), Protein kinase, catalytic domain (InterPro:IPR000719), Serine/threonine-protein kinase domain (InterPro:IPR002290), Tyrosine-protein kinase, catalytic d…	Concanavalin A-like lectin/glucanase, subgroup | Protein kinase domain | Protein kinase-like domain | Serine/threonine-protein kinase, active site | Wall-associated receptor kinase | Wall-associated receptor kinase galacturonan-binding domain	NO
AT1G16190	0.454151	3.98716	0.000153082	0.00205744	UP		Rad23 UV excision repair protein family	RADIATION SENSITIVE23A (RAD23A); FUNCTIONS IN: damaged DNA binding, ubiquitin binding, proteasome binding; INVOLVED IN: proteasomal ubiquitin-dependent protein catabolic process, base-excision repair, nucleotide-excision repair; LOCATED IN: nucleus; EXPRESSED IN: 21 plant structures; EXPRESSED DURING: 13 growth stages; CONTAINS InterPro DOMAIN/s: Heat shock chaperonin-binding (InterPro:IPR006636)…	Heat shock chaperonin-binding | UBA-like | UV excision repair protein Rad23 | Ubiquitin-associated domain/translation elongation factor EF-Ts, N-terminal | Ubiquitin-associated/translation elongation factor EF1B, N-terminal, eukaryote | Ubiquitin-like | Ubiquitin-related domain | XPC-binding domain	NO
AT1G16260	-0.550774	4.42557	9.22153e-07	2.729e-05	DOWN		Wall-associated kinase family protein	Wall-associated kinase family protein; FUNCTIONS IN: kinase activity; INVOLVED IN: protein amino acid phosphorylation; LOCATED IN: endomembrane system, integral to membrane; EXPRESSED IN: 19 plant structures; EXPRESSED DURING: 13 growth stages; CONTAINS InterPro DOMAIN/s: Wall-associated kinase (InterPro:IPR013695), EGF-like calcium-binding, conserved site (InterPro:IPR018097), Protein kinase, ca…	Concanavalin A-like lectin/glucanase, subgroup | EGF-like calcium-binding domain | EGF-like calcium-binding, conserved site | Protein kinase domain | Protein kinase-like domain | Serine-threonine/tyrosine-protein kinase catalytic domain | Serine/threonine-protein kinase, active site | Wall-associated receptor kinase | Wall-associated receptor kinase galacturonan-binding domain	NO
AT1G16300	0.783831	2.88827	8.93138e-07	2.66683e-05	UP		glyceraldehyde-3-phosphate dehydrogenase of plastid 2	glyceraldehyde-3-phosphate dehydrogenase of plastid 2 (GAPCP-2); CONTAINS InterPro DOMAIN/s: Glyceraldehyde 3-phosphate dehydrogenase subfamily (InterPro:IPR000173), Glyceraldehyde 3-phosphate dehydrogenase, catalytic domain (InterPro:IPR020829), Glyceraldehyde-3-phosphate dehydrogenase, type I (InterPro:IPR006424), Glyceraldehyde 3-phosphate dehydrogenase, catalytic domain, subgroup (InterPro:IP…	Glyceraldehyde 3-phosphate dehydrogenase, NAD(P) binding domain | Glyceraldehyde 3-phosphate dehydrogenase, active site | Glyceraldehyde 3-phosphate dehydrogenase, catalytic domain | Glyceraldehyde-3-phosphate dehydrogenase, type I | Glyceraldehyde/Erythrose phosphate dehydrogenase family | NAD(P)-binding domain	NO
AT1G16330	0.727077	0.468701	0.00593005	0.0401629	UP		cyclin b3;1	cyclin b3;1 (CYCB3;1); FUNCTIONS IN: cyclin-dependent protein kinase activity; INVOLVED IN: regulation of cell cycle; LOCATED IN: nucleus; EXPRESSED IN: 17 plant structures; EXPRESSED DURING: 10 growth stages; CONTAINS InterPro DOMAIN/s: Cyclin, C-terminal (InterPro:IPR004367), Cyclin-like (InterPro:IPR011028), Cyclin-related (InterPro:IPR013763), Cyclin, N-terminal (InterPro:IPR006671), Cyclin (…		NO
AT1G16340	0.483473	3.87423	0.000499117	0.00548475	UP		Aldolase superfamily protein	ATKDSA2; FUNCTIONS IN: 3-deoxy-8-phosphooctulonate synthase activity; INVOLVED IN: metabolic process, rhamnogalacturonan II biosynthetic process; LOCATED IN: endomembrane system, cytoplasm; EXPRESSED IN: 18 plant structures; EXPRESSED DURING: 9 growth stages; CONTAINS InterPro DOMAIN/s: DAHP synthetase I/KDSA (InterPro:IPR006218), Aldolase-type TIM barrel (InterPro:IPR013785), 3-deoxy-8-phosphooc…	3-deoxy-8-phosphooctulonate synthase | Aldolase-type TIM barrel | DAHP synthetase I/KDSA	NO
AT1G16350	0.732135	5.22266	1.49037e-12	1.7613e-10	UP		Aldolase-type TIM barrel family protein	Aldolase-type TIM barrel family protein; FUNCTIONS IN: IMP dehydrogenase activity, oxidoreductase activity, catalytic activity; INVOLVED IN: oxidation reduction, GMP biosynthetic process, metabolic process; LOCATED IN: cellular_component unknown; EXPRESSED IN: 24 plant structures; EXPRESSED DURING: 13 growth stages; CONTAINS InterPro DOMAIN/s: IMP dehydrogenase (InterPro:IPR005990), IMP dehydroge…	Aldolase-type TIM barrel | IMP dehydrogenase / GMP reductase, conserved site | IMP dehydrogenase/GMP reductase | Inosine-5'-monophosphate dehydrogenase	NO
AT1G16460	-0.395581	6.01058	0.000127565	0.00177322	DOWN		rhodanese homologue 2	rhodanese homologue 2 (RDH2); FUNCTIONS IN: 3-mercaptopyruvate sulfurtransferase activity, thiosulfate sulfurtransferase activity; INVOLVED IN: sulfate transport, aging; LOCATED IN: cytosol, cytoplasm; EXPRESSED IN: 22 plant structures; EXPRESSED DURING: 13 growth stages; CONTAINS InterPro DOMAIN/s: Rhodanese-like (InterPro:IPR001763), Thiosulphate sulfurtransferase, conserved site (InterPro:IPR0…	Rhodanese-like domain | Thiosulphate sulfurtransferase, conserved site	NO
AT1G16480	0.641023	1.46265	0.00744093	0.0479743	UP		Tetratricopeptide repeat (TPR)-like superfamily protein	Tetratricopeptide repeat (TPR)-like superfamily protein; FUNCTIONS IN: molecular_function unknown; INVOLVED IN: biological_process unknown; LOCATED IN: cellular_component unknown; EXPRESSED IN: shoot apex; CONTAINS InterPro DOMAIN/s: Pentatricopeptide repeat (InterPro:IPR002885); BEST Arabidopsis thaliana protein match is: Pentatricopeptide repeat (PPR) superfamily protein (TAIR:AT4G13650.1)	Pentatricopeptide repeat | Tetratricopeptide-like helical domain	NO
AT1G16489	-1.67324	0.439327	3.86858e-09	2.30616e-07	DOWN		other RNA			NO
AT1G16500	-0.82432	0.459144	0.00123748	0.0114819	DOWN			unknown protein; BEST Arabidopsis thaliana protein match is: unknown protein (TAIR:AT1G79160.1)		NO
AT1G16520	0.668253	3.08694	9.70785e-05	0.00141914	UP			unknown protein; FUNCTIONS IN: molecular_function unknown; INVOLVED IN: biological_process unknown; LOCATED IN: plasma membrane; EXPRESSED IN: 22 plant structures; EXPRESSED DURING: 13 growth stages; BEST Arabidopsis thaliana protein match is: unknown protein (TAIR:AT1G56080.1)		NO
AT1G16630	0.876386	1.47778	0.000348903	0.00411079	UP			unknown protein; LOCATED IN: chloroplast; BEST Arabidopsis thaliana protein match is: unknown protein (TAIR:AT2G16270.1)		NO
AT1G16680	0.463218	5.17862	2.17055e-05	0.000403012	UP		Chaperone DnaJ-domain superfamily protein	Chaperone DnaJ-domain superfamily protein; FUNCTIONS IN: unfolded protein binding, heat shock protein binding; INVOLVED IN: protein folding; LOCATED IN: cellular_component unknown; EXPRESSED IN: 22 plant structures; EXPRESSED DURING: 13 growth stages; CONTAINS InterPro DOMAIN/s: Molecular chaperone, heat shock protein, Hsp40, DnaJ (InterPro:IPR015609), Heat shock protein DnaJ, N-terminal (InterPr…	DnaJ domain | DnaJ domain, conserved site	NO
AT1G16705	1.67086	-0.805766	7.6063e-06	0.00016571	UP		p300/CBP acetyltransferase-related protein-related	p300/CBP acetyltransferase-related protein-related; BEST Arabidopsis thaliana protein match is: histone acetyltransferase of the CBP family 12 (TAIR:AT1G16710.2)		NO
AT1G16790	0.535626	3.14129	6.74553e-05	0.0010465	UP		ribosomal protein-related	ribosomal protein-related; FUNCTIONS IN: molecular_function unknown; INVOLVED IN: biological_process unknown; LOCATED IN: chloroplast thylakoid membrane, chloroplast, chloroplast envelope; EXPRESSED IN: 19 plant structures; EXPRESSED DURING: 11 growth stages		NO
AT1G16870	0.498398	4.28522	2.76614e-05	0.000497417	UP		mitochondrial 28S ribosomal protein S29-related	mitochondrial 28S ribosomal protein S29-related; CONTAINS InterPro DOMAIN/s: Ribosomal protein S23/S29, mitochondrial (InterPro:IPR019368)	Ribosomal protein S23/S29, mitochondrial	NO
AT1G16880	-0.379386	8.37746	5.77088e-05	0.000924247	DOWN		uridylyltransferase-related	uridylyltransferase-related; INVOLVED IN: response to cold; LOCATED IN: chloroplast thylakoid membrane, stromule, chloroplast; LOCATED IN: chloroplast thylakoid membrane, stromule, chloroplast stroma, chloroplast, chloroplast envelope; EXPRESSED IN: 22 plant structures; EXPRESSED DURING: 13 growth stages; BEST Arabidopsis thaliana protein match is: ACT domain-containing protein (TAIR:AT5G04740.1)	ACT domain	NO
AT1G16920	0.557987	4.79642	3.92404e-05	0.000671573	UP		RAB GTPase homolog A1B	RAB GTPase homolog A1B (RABA1b); FUNCTIONS IN: GTP binding; INVOLVED IN: intracellular protein transport; LOCATED IN: trans-Golgi network, plasma membrane, vacuole; EXPRESSED IN: 25 plant structures; EXPRESSED DURING: 13 growth stages; CONTAINS InterPro DOMAIN/s: Ran GTPase (InterPro:IPR002041), Ras (InterPro:IPR013753), Ras small GTPase, Ras type (InterPro:IPR003577), Rab11-related (InterPro:IPR…	P-loop containing nucleoside triphosphate hydrolase | Small GTP-binding protein domain | Small GTPase superfamily | Small GTPase superfamily, Rab type	NO
AT1G17050	-0.515096	5.88614	2.21787e-05	0.000410666	DOWN		solanesyl diphosphate synthase 2	solanesyl diphosphate synthase 2 (SPS2); FUNCTIONS IN: trans-octaprenyltranstransferase activity; INVOLVED IN: ubiquinone biosynthetic process; LOCATED IN: chloroplast, plastid; EXPRESSED IN: 22 plant structures; EXPRESSED DURING: 13 growth stages; CONTAINS InterPro DOMAIN/s: Solanesyl diphosphate synthase (InterPro:IPR014120), Polyprenyl synthetase-related (InterPro:IPR017446), Terpenoid synthas…	Polyprenyl synthetase | Polyprenyl synthetase-related | Solanesyl diphosphate synthase | Terpenoid synthase	NO
AT1G17100	-0.508077	5.67977	1.37053e-06	3.86606e-05	DOWN		SOUL heme-binding family protein	SOUL heme-binding family protein; FUNCTIONS IN: binding; INVOLVED IN: biological_process unknown; LOCATED IN: plasma membrane, vacuole; EXPRESSED IN: 24 plant structures; EXPRESSED DURING: 14 growth stages; CONTAINS InterPro DOMAIN/s: SOUL haem-binding protein (InterPro:IPR006917); BEST Arabidopsis thaliana protein match is: SOUL heme-binding family protein (TAIR:AT1G78450.1)	Regulatory factor, effector binding domain | SOUL haem-binding protein	NO
AT1G17145	0.766862	5.20665	4.97395e-13	6.59557e-11	UP		RING/U-box superfamily protein	RING/U-box superfamily protein; FUNCTIONS IN: zinc ion binding; INVOLVED IN: biological_process unknown; LOCATED IN: cellular_component unknown; EXPRESSED IN: 24 plant structures; EXPRESSED DURING: 15 growth stages; CONTAINS InterPro DOMAIN/s: Zinc finger, RING-type (InterPro:IPR001841); BEST Arabidopsis thaliana protein match is: RING/U-box superfamily protein (TAIR:AT1G78420.2)	Zinc finger, RING-type | Zinc finger, RING/FYVE/PHD-type	NO
AT1G17147	0.711082	2.0727	0.0071068	0.046245	UP		VQ motif-containing protein	VQ motif-containing protein; FUNCTIONS IN: molecular_function unknown; INVOLVED IN: biological_process unknown; LOCATED IN: cellular_component unknown; CONTAINS InterPro DOMAIN/s: VQ (InterPro:IPR008889); BEST Arabidopsis thaliana protein match is: VQ motif-containing protein (TAIR:AT1G78410.1)	VQ	NO
AT1G17170	-1.20945	2.96581	0.00319631	0.0246462	DOWN		glutathione S-transferase TAU 24	glutathione S-transferase TAU 24 (GSTU24); FUNCTIONS IN: glutathione transferase activity, glutathione binding; INVOLVED IN: response to cyclopentenone, toxin catabolic process; LOCATED IN: cytoplasm; EXPRESSED IN: 15 plant structures; EXPRESSED DURING: 6 growth stages; CONTAINS InterPro DOMAIN/s: Thioredoxin fold (InterPro:IPR012335), Glutathione S-transferase, C-terminal (InterPro:IPR004046), G…	Glutathione S-transferase, C-terminal | Glutathione S-transferase, C-terminal-like | Glutathione S-transferase, N-terminal | Thioredoxin-like fold	NO
AT1G17240	-1.46536	-0.480932	2.91701e-06	7.40376e-05	DOWN		receptor like protein 2	receptor like protein 2 (RLP2); CONTAINS InterPro DOMAIN/s: Leucine-rich repeat-containing N-terminal domain, type 2 (InterPro:IPR013210), Leucine-rich repeat (InterPro:IPR001611); BEST Arabidopsis thaliana protein match is: Leucine-rich receptor-like protein kinase family protein (TAIR:AT1G72300.1)	Leucine-rich repeat | Leucine-rich repeat-containing N-terminal, type 2	NO
AT1G17360	-0.455777	5.75583	8.25274e-06	0.000177497	DOWN			BEST Arabidopsis thaliana protein match is: COP1-interacting protein-related (TAIR:AT1G72410.1)		NO
AT1G17420	-2.0167	2.01702	5.85441e-22	2.40466e-19	DOWN		lipoxygenase 3	lipoxygenase 3 (LOX3); FUNCTIONS IN: oxidoreductase activity, acting on single donors with incorporation of molecular oxygen, incorporation of two atoms of oxygen, lipoxygenase activity, iron ion binding, metal ion binding; INVOLVED IN: growth, response to fungus, jasmonic acid biosynthetic process, response to wounding, defense response; LOCATED IN: chloroplast; EXPRESSED IN: 22 plant structures…	Lipase/lipooxygenase, PLAT/LH2 | Lipoxygenase | Lipoxygenase, C-terminal | Lipoxygenase, conserved site | Lipoxygenase, domain 3 | Lipoxygenase, iron binding site | Lipoxygenase, plant | PLAT/LH2 domain	NO
AT1G17510	0.499036	2.29598	0.00467564	0.0332588	UP			unknown protein		NO
AT1G17530	0.269458	5.02736	0.00636096	0.042534	UP		translocase of inner mitochondrial membrane 23	translocase of inner mitochondrial membrane 23 (TIM23-1); CONTAINS InterPro DOMAIN/s: Mitochondrial inner membrane translocase complex, subunit Tim23 (InterPro:IPR005681), Mitochondrial inner membrane translocase complex, subunit Tim17/22 (InterPro:IPR003397); BEST Arabidopsis thaliana protein match is: translocase inner membrane subunit 23-2 (TAIR:AT1G72750.1)	Mitochondrial inner membrane translocase subunit Tim17/Tim22/Tim23/peroxisomal protein PMP24	NO
AT1G17690	0.506651	4.21176	3.01058e-05	0.000533681	UP			FUNCTIONS IN: molecular_function unknown; INVOLVED IN: biological_process unknown; LOCATED IN: nucleus; EXPRESSED IN: 24 plant structures; EXPRESSED DURING: 13 growth stages; CONTAINS InterPro DOMAIN/s: Digestive organ expansion factor, predicted (InterPro:IPR010678)	Digestive organ expansion factor, predicted | P-loop containing nucleoside triphosphate hydrolase	YES	1:6086818:A-AT;intronic_variant
AT1G17880	0.439389	6.81954	1.63318e-06	4.5051e-05	UP		basic transcription factor 3	basic transcription factor 3 (BTF3); FUNCTIONS IN: sequence-specific DNA binding transcription factor activity; INVOLVED IN: response to salt stress; LOCATED IN: cellular_component unknown; EXPRESSED IN: 24 plant structures; EXPRESSED DURING: 15 growth stages; CONTAINS InterPro DOMAIN/s: Nascent polypeptide-associated complex NAC (InterPro:IPR002715); BEST Arabidopsis thaliana protein match is: N…	Nascent polypeptide-associated complex NAC domain	NO
AT1G17980	0.421151	5.17928	0.000157457	0.00211119	UP		poly(A) polymerase 1	poly(A) polymerase 1 (PAPS1); CONTAINS InterPro DOMAIN/s: Poly(A) polymerase (InterPro:IPR014492), Poly(A) polymerase, central domain (InterPro:IPR007012), Nucleotidyltransferase, class I, C-terminal-like (InterPro:IPR011068), Nucleotidyl transferase domain (InterPro:IPR002934), Poly(A) polymerase, RNA-binding domain (InterPro:IPR007010); CONTAINS InterPro DOMAIN/s: Poly(A) polymerase (InterPro:I…	Nucleotidyl transferase domain | Nucleotidyltransferase, class I, C-terminal-like | Poly(A) polymerase | Poly(A) polymerase, RNA-binding domain | Poly(A) polymerase, central domain	NO
AT1G17990	-1.4434	5.61295	3.96141e-13	5.33697e-11	DOWN		FMN-linked oxidoreductases superfamily protein	FMN-linked oxidoreductases superfamily protein; FUNCTIONS IN: oxidoreductase activity, FMN binding, catalytic activity; INVOLVED IN: metabolic process; CONTAINS InterPro DOMAIN/s: NADH:flavin oxidoreductase/NADH oxidase, N-terminal (InterPro:IPR001155), Aldolase-type TIM barrel (InterPro:IPR013785); BEST Arabidopsis thaliana protein match is: FMN-linked oxidoreductases superfamily protein (TAIR:A…	Aldolase-type TIM barrel | NADH:flavin oxidoreductase/NADH oxidase, N-terminal	NO
AT1G18010	-3.99155	0.0204451	0.00227421	0.018751	DOWN		Major facilitator superfamily protein	Major facilitator superfamily protein; FUNCTIONS IN: molecular_function unknown; INVOLVED IN: transmembrane transport; LOCATED IN: cellular_component unknown; CONTAINS InterPro DOMAIN/s: Major facilitator superfamily MFS-1 (InterPro:IPR011701), Major facilitator superfamily, general substrate transporter (InterPro:IPR016196); BEST Arabidopsis thaliana protein match is: Major facilitator superfami…	Ion channel regulatory protein, UNC-93 | Major facilitator superfamily domain, general substrate transporter	NO
AT1G18060	-0.290841	6.38463	0.00295915	0.0231354	DOWN			unknown protein; INVOLVED IN: biological_process unknown; LOCATED IN: chloroplast; EXPRESSED IN: 22 plant structures; EXPRESSED DURING: 13 growth stages		NO
AT1G18080	0.392085	7.8447	3.03205e-05	0.000537204	UP	YES	Transducin/WD40 repeat-like superfamily protein	ATARCA; FUNCTIONS IN: nucleotide binding; INVOLVED IN: response to cadmium ion; LOCATED IN: cytosolic ribosome, chloroplast, heterotrimeric G-protein complex; EXPRESSED IN: 26 plant structures; EXPRESSED DURING: 15 growth stages; CONTAINS InterPro DOMAIN/s: WD40 repeat 2 (InterPro:IPR019782), WD40 repeat, conserved site (InterPro:IPR019775), WD40 repeat (InterPro:IPR001680), G-protein beta WD-40 …	G-protein beta WD-40 repeat | WD40 repeat | WD40 repeat, conserved site | WD40-repeat-containing domain | WD40/YVTN repeat-like-containing domain	NO
AT1G18090	1.03353	3.01652	3.38724e-11	3.11709e-09	UP		5'-3' exonuclease family protein	5'-3' exonuclease family protein; FUNCTIONS IN: DNA binding, catalytic activity, nuclease activity; INVOLVED IN: DNA repair; LOCATED IN: cellular_component unknown; EXPRESSED IN: 22 plant structures; EXPRESSED DURING: 14 growth stages; CONTAINS InterPro DOMAIN/s: XPG conserved site (InterPro:IPR019974), XPG N-terminal (InterPro:IPR006085), DNA repair protein (XPGC)/yeast Rad (InterPro:IPR006084),…	5'-3' exonuclease, C-terminal domain | Helix-hairpin-helix motif, class 2 | PIN domain-like | XPG N-terminal | XPG conserved site | XPG-I domain	NO
AT1G18200	-0.809103	0.826102	0.00234372	0.0192019	DOWN		RAB GTPase homolog A6B	RAB GTPase homolog A6B (RABA6b); FUNCTIONS IN: GTP binding, GTPase activity; INVOLVED IN: intracellular protein transport, signal transduction, nucleocytoplasmic transport, protein transport, small GTPase mediated signal transduction; LOCATED IN: intracellular; CONTAINS InterPro DOMAIN/s: Ran GTPase (InterPro:IPR002041), Ras (InterPro:IPR013753), Ras small GTPase, Ras type (InterPro:IPR003577), R…	P-loop containing nucleoside triphosphate hydrolase | Small GTP-binding protein domain | Small GTPase superfamily | Small GTPase superfamily, Rab type	NO
AT1G18250	0.703611	2.27065	0.000428564	0.00482436	UP		Pathogenesis-related thaumatin superfamily protein	ATLP-1; INVOLVED IN: response to other organism; LOCATED IN: endomembrane system; EXPRESSED IN: 19 plant structures; EXPRESSED DURING: 13 growth stages; CONTAINS InterPro DOMAIN/s: Thaumatin, conserved site (InterPro:IPR017949), Thaumatin, pathogenesis-related (InterPro:IPR001938); BEST Arabidopsis thaliana protein match is: Pathogenesis-related thaumatin superfamily protein (TAIR:AT1G73620.1)	Thaumatin | Thaumatin, conserved site	NO
AT1G18270	-0.34842	5.91513	0.000147974	0.00199836	DOWN		ketose-bisphosphate aldolase class-II family protein	ketose-bisphosphate aldolase class-II family protein; FUNCTIONS IN: in 8 functions; INVOLVED IN: oxidation reduction, pentose-phosphate shunt, valine metabolic process, glycolysis, metabolic process; EXPRESSED IN: 23 plant structures; LOCATED IN: nucleus; EXPRESSED DURING: 13 growth stages; CONTAINS InterPro DOMAIN/s: Aldolase-type TIM barrel (InterPro:IPR013785), 6-phosphogluconate dehydrogenase…	3-hydroxyisobutyrate dehydrogenase-related, conserved site | 6-phosphogluconate dehydrogenase, C-terminal-like | 6-phosphogluconate dehydrogenase, NADP-binding | Aldolase-type TIM barrel | Dehydrogenase, multihelical | Ketose-bisphosphate aldolase, class-II | NAD(P)-binding domain | NADP-dependent 3-hydroxyisobutyrate dehydrogenase, NAD-binding domain | Protein of unknown function, DUF1537	NO
AT1G18340	0.413521	3.49947	0.00149007	0.013355	UP		basal transcription factor complex subunit-related	basal transcription factor complex subunit-related; FUNCTIONS IN: general RNA polymerase II transcription factor activity; INVOLVED IN: DNA repair, regulation of transcription, DNA-dependent; LOCATED IN: core TFIIH complex; EXPRESSED IN: 17 plant structures; EXPRESSED DURING: 9 growth stages; CONTAINS InterPro DOMAIN/s: Transcription factor Tfb4 (InterPro:IPR004600)	TFIIH subunit Tfb4/p34	NO
AT1G18370	0.668349	2.86167	0.000233314	0.00293	UP		ATP binding microtubule motor family protein	HINKEL (HIK); FUNCTIONS IN: microtubule motor activity, ATP binding; INVOLVED IN: response to cyclopentenone, cellularization of the embryo sac, gametophyte development, pollen development, cytokinesis; LOCATED IN: chloroplast; EXPRESSED IN: 22 plant structures; EXPRESSED DURING: 13 growth stages; CONTAINS InterPro DOMAIN/s: Protein of unknown function DUF3490 (InterPro:IPR021881), Kinesin, motor…	Kinesin, motor domain | Kinesin, motor region, conserved site | Kinesin-like protein | P-loop containing nucleoside triphosphate hydrolase | Protein of unknown function DUF3490	NO
AT1G18450	0.521825	5.69528	6.00005e-07	1.92281e-05	UP		actin-related protein 4	actin-related protein 4 (ARP4); FUNCTIONS IN: structural constituent of cytoskeleton; INVOLVED IN: long-day photoperiodism, flowering, chromatin organization, pollen sperm cell differentiation; LOCATED IN: nucleolus, nucleus; EXPRESSED IN: 25 plant structures; EXPRESSED DURING: 14 growth stages; CONTAINS InterPro DOMAIN/s: Actin/actin-like (InterPro:IPR004000); BEST Arabidopsis thaliana protein m…	Actin-related protein | Actin-related protein 4 (Arp4)	NO
AT1G18540	0.500985	7.25276	6.79354e-07	2.13451e-05	UP		Ribosomal protein L6 family protein	Ribosomal protein L6 family protein; FUNCTIONS IN: structural constituent of ribosome; INVOLVED IN: translation; LOCATED IN: in 8 components; EXPRESSED IN: 25 plant structures; EXPRESSED DURING: 15 growth stages; CONTAINS InterPro DOMAIN/s: Ribosomal protein L6, N-terminal (InterPro:IPR005568), Ribosomal protein L6E (InterPro:IPR000915); BEST Arabidopsis thaliana protein match is: Ribosomal prote…	60S ribosomal protein L6E | Ribosomal protein L2 domain 2 | Ribosomal protein L6, N-terminal | Translation protein SH3-like domain	NO
AT1G18570	0.807519	4.06878	2.84842e-07	1.00039e-05	UP		myb domain protein 51	myb domain protein 51 (MYB51); CONTAINS InterPro DOMAIN/s: SANT, DNA-binding (InterPro:IPR001005), Homeodomain-like (InterPro:IPR009057), Myb, DNA-binding (InterPro:IPR014778), HTH transcriptional regulator, Myb-type, DNA-binding (InterPro:IPR017930), Homeodomain-related (InterPro:IPR012287), Myb transcription factor (InterPro:IPR015495); BEST Arabidopsis thaliana protein match is: myb domain pro…	Homeodomain-like | Myb domain | SANT/Myb domain	NO
AT1G18630	0.577652	2.58144	0.000811544	0.00814713	UP		glycine-rich RNA-binding protein 6	glycine-rich RNA-binding protein 6 (GR-RBP6); FUNCTIONS IN: RNA binding, nucleotide binding, nucleic acid binding; INVOLVED IN: biological_process unknown; LOCATED IN: mitochondrion; EXPRESSED IN: 22 plant structures; EXPRESSED DURING: 13 growth stages; CONTAINS InterPro DOMAIN/s: RNA recognition motif, RNP-1 (InterPro:IPR000504), Nucleotide-binding, alpha-beta plait (InterPro:IPR012677); BEST Ar…	Nucleotide-binding, alpha-beta plait | RNA recognition motif domain	NO
AT1G18670	0.473567	4.69969	2.45742e-05	0.000446636	UP		Protein kinase superfamily protein	IMPAIRED IN BABA-INDUCED STERILITY 1 (IBS1); FUNCTIONS IN: protein serine/threonine kinase activity, protein kinase activity, kinase activity, ATP binding; INVOLVED IN: protein amino acid phosphorylation, N-terminal protein myristoylation; LOCATED IN: plasma membrane; EXPRESSED IN: 20 plant structures; EXPRESSED DURING: 13 growth stages; CONTAINS InterPro DOMAIN/s: Protein kinase, ATP binding sit…	Protein kinase domain | Protein kinase, ATP binding site | Protein kinase-like domain | Serine/threonine-protein kinase, active site | Serine/threonine/dual specificity protein kinase, catalytic domain	NO
AT1G18680	0.424045	3.09392	0.00551504	0.0379839	UP		HNH endonuclease domain-containing protein	HNH endonuclease domain-containing protein; FUNCTIONS IN: endonuclease activity, nucleic acid binding; INVOLVED IN: N-terminal protein myristoylation; LOCATED IN: chloroplast; EXPRESSED IN: 7 plant structures; EXPRESSED DURING: L mature pollen stage, M germinated pollen stage, 4 anthesis, petal differentiation and expansion stage; CONTAINS InterPro DOMAIN/s: HNH nuclease (InterPro:IPR003615), HNH…	HNH endonuclease | HNH nuclease	NO
AT1G18710	0.895947	5.12208	2.15612e-09	1.37799e-07	UP		myb domain protein 47	myb domain protein 47 (MYB47); FUNCTIONS IN: DNA binding, sequence-specific DNA binding transcription factor activity; INVOLVED IN: response to jasmonic acid stimulus, response to salt stress, regulation of transcription, DNA-dependent; LOCATED IN: nucleus, cytoplasm; EXPRESSED IN: leaf lamina base, stem, leaf whorl, leaf; EXPRESSED DURING: LP.06 six leaves visible, LP.04 four leaves visible, LP.…	Homeodomain-like | Myb domain | SANT/Myb domain	NO
AT1G18730	-0.658604	6.59551	3.24316e-11	2.99268e-09	DOWN		NDH dependent flow 6	NDH dependent flow 6 (NDF6); FUNCTIONS IN: molecular_function unknown; INVOLVED IN: photosynthetic electron transport in photosystem I; LOCATED IN: chloroplast thylakoid membrane, chloroplast, NAD(P)H dehydrogenase complex (plastoquinone); EXPRESSED IN: 21 plant structures; EXPRESSED DURING: 13 growth stages		NO
AT1G18800	0.925767	4.92701	2.64467e-14	4.40966e-12	UP		NAP1-related protein 2	NAP1-related protein 2 (NRP2); FUNCTIONS IN: chromatin binding, histone binding, DNA binding; INVOLVED IN: cell proliferation, cell differentiation, nucleosome assembly, lateral root formation; LOCATED IN: nucleus, cytoplasm; EXPRESSED IN: 24 plant structures; EXPRESSED DURING: 14 growth stages; CONTAINS InterPro DOMAIN/s: Nucleosome assembly protein (NAP) (InterPro:IPR002164); BEST Arabidopsis t…		NO
AT1G18960	-5.23718	-3.29347	0.000322989	0.00385355	DOWN		myb-like HTH transcriptional regulator family protein	myb-like HTH transcriptional regulator family protein; FUNCTIONS IN: DNA binding, sequence-specific DNA binding transcription factor activity; INVOLVED IN: regulation of transcription, DNA-dependent, regulation of transcription; CONTAINS InterPro DOMAIN/s: SANT, DNA-binding (InterPro:IPR001005), Homeodomain-like (InterPro:IPR009057), Myb, DNA-binding (InterPro:IPR014778), HTH transcriptional regu…	Homeodomain-like | Myb domain | SANT/Myb domain	NO
AT1G18990	3.19882	2.76066	4.1926e-38	5.88378e-35	UP		Protein of unknown function, DUF593	Protein of unknown function, DUF593; FUNCTIONS IN: molecular_function unknown; INVOLVED IN: biological_process unknown; LOCATED IN: endomembrane system; EXPRESSED IN: 9 plant structures; EXPRESSED DURING: L mature pollen stage, M germinated pollen stage, 4 anthesis, C globular stage, petal differentiation and expansion stage; CONTAINS InterPro DOMAIN/s: Protein of unknown function DUF593 (InterPr…	Zein-binding domain	NO
AT1G19080	0.528574	3.63423	9.74693e-05	0.001423	UP		GINS complex protein	TITAN 10 (TTN10); FUNCTIONS IN: molecular_function unknown; INVOLVED IN: DNA-dependent DNA replication, embryo development ending in seed dormancy; LOCATED IN: GINS complex; EXPRESSED IN: pollen tube; CONTAINS InterPro DOMAIN/s: GINS complex, subunit Psf3 (InterPro:IPR010492), GINS complex (InterPro:IPR021151); BEST Arabidopsis thaliana protein match is: GINS complex protein (TAIR:AT3G55490.1)	GINS complex | GINS complex, subunit Psf3	NO
AT1G19130	-0.340124	4.38966	0.00180958	0.0155759	DOWN			CONTAINS InterPro DOMAIN/s: Protein of unknown function DUF985 (InterPro:IPR009327), RmlC-like jelly roll fold (InterPro:IPR014710)	Protein of unknown function DUF985 | RmlC-like cupin domain | RmlC-like jelly roll fold	NO
AT1G19240	0.598264	2.53133	0.000369453	0.00429828	UP			unknown protein		NO
AT1G19400	0.332031	7.12664	0.00400237	0.0294203	UP		Erythronate-4-phosphate dehydrogenase family protein	Erythronate-4-phosphate dehydrogenase family protein; BEST Arabidopsis thaliana protein match is: Erythronate-4-phosphate dehydrogenase family protein (TAIR:AT1G75180.3)		NO
AT1G19520	0.504726	4.46164	1.43416e-05	0.000284644	UP		pentatricopeptide (PPR) repeat-containing protein	NUCLEAR FUSION DEFECTIVE 5 (NFD5); EXPRESSED IN: 21 plant structures; EXPRESSED DURING: 13 growth stages; CONTAINS InterPro DOMAIN/s: Pentatricopeptide repeat (InterPro:IPR002885); BEST Arabidopsis thaliana protein match is: Tetratricopeptide repeat (TPR)-like superfamily protein (TAIR:AT1G01970.1)		NO
AT1G19600	0.354884	5.89842	0.00265812	0.0212051	UP		pfkB-like carbohydrate kinase family protein	pfkB-like carbohydrate kinase family protein; FUNCTIONS IN: kinase activity; INVOLVED IN: D-ribose catabolic process; LOCATED IN: cellular_component unknown; EXPRESSED IN: 21 plant structures; EXPRESSED DURING: 13 growth stages; CONTAINS InterPro DOMAIN/s: Carbohydrate/purine kinase (InterPro:IPR011611); BEST Arabidopsis thaliana protein match is: pfkB-like carbohydrate kinase family protein (TAI…	Carbohydrate kinase PfkB | Ribokinase-like	NO
AT1G19650	-0.45503	5.09795	5.01373e-06	0.00011606	DOWN		Sec14p-like phosphatidylinositol transfer family protein	Sec14p-like phosphatidylinositol transfer family protein; FUNCTIONS IN: phosphatidylinositol transporter activity, transporter activity; INVOLVED IN: transport; LOCATED IN: plasma membrane; EXPRESSED IN: 20 plant structures; EXPRESSED DURING: 15 growth stages; CONTAINS InterPro DOMAIN/s: Cellular retinaldehyde-binding/triple function, C-terminal (InterPro:IPR001251), Cellular retinaldehyde bindin…	CRAL-TRIO domain | CRAL/TRIO, N-terminal domain | Cellular retinaldehyde binding/alpha-tocopherol transport	YES	1:6799746:C-CT;exonic_variant
AT1G19660	-0.417812	7.98245	1.04344e-05	0.000217346	DOWN		Wound-responsive family protein	Wound-responsive family protein; FUNCTIONS IN: DNA binding, nuclease activity; INVOLVED IN: response to wounding, nucleotide-excision repair; EXPRESSED IN: ovule; CONTAINS InterPro DOMAIN/s: Protein of unknown function DUF151 (InterPro:IPR003729), UvrB/UvrC protein (InterPro:IPR001943); BEST Arabidopsis thaliana protein match is: bifunctional nuclease in basal defense response 1 (TAIR:AT1G75380.3)	Bifunctional nuclease domain | UVR domain	NO
AT1G19670	-0.922133	3.42134	5.66159e-07	1.8307e-05	DOWN		chlorophyllase 1	chlorophyllase 1 (CLH1); FUNCTIONS IN: chlorophyllase activity; INVOLVED IN: response to jasmonic acid stimulus, chlorophyll catabolic process, jasmonic acid mediated signaling pathway, response to stress; LOCATED IN: vacuole; EXPRESSED IN: 21 plant structures; EXPRESSED DURING: 14 growth stages; CONTAINS InterPro DOMAIN/s: Chlorophyllase-like (InterPro:IPR010821), Chlorophyllase, chloroplast (In…	Alpha/Beta hydrolase fold | Chlorophyllase | Chlorophyllase, chloroplast	NO
AT1G19750	1.22975	0.366947	3.0951e-06	7.75641e-05	UP		Transducin/WD40 repeat-like superfamily protein	Transducin/WD40 repeat-like superfamily protein; CONTAINS InterPro DOMAIN/s: WD40 repeat 2 (InterPro:IPR019782), WD40 repeat, conserved site (InterPro:IPR019775), WD40 repeat (InterPro:IPR001680), G-protein beta WD-40 repeat, region (InterPro:IPR020472), WD40 repeat-like-containing domain (InterPro:IPR011046), WD40-repeat-containing domain (InterPro:IPR017986), WD40/YVTN repeat-like-containing do…	G-protein beta WD-40 repeat | WD40 repeat | WD40 repeat, conserved site | WD40-repeat-containing domain | WD40/YVTN repeat-like-containing domain	NO
AT1G19870	0.305652	6.28012	0.00103285	0.00991658	UP		IQ-domain 32	IQ-domain 32 (iqd32); FUNCTIONS IN: calmodulin binding; INVOLVED IN: biological_process unknown; LOCATED IN: cytosol, nucleus, plasma membrane, chloroplast envelope; EXPRESSED IN: 24 plant structures; EXPRESSED DURING: 13 growth stages; CONTAINS InterPro DOMAIN/s: IQ calmodulin-binding region (InterPro:IPR000048); BEST Arabidopsis thaliana protein match is: IQ-domain 31 (TAIR:AT1G74690.1)	Domain of unknown function DUF4005 | IQ motif, EF-hand binding site	NO
AT1G19960	-1.44408	1.16988	0.00114983	0.0108389	DOWN			BEST Arabidopsis thaliana protein match is: transmembrane receptors (TAIR:AT2G32140.1)		NO
AT1G20030	0.662067	3.71732	8.46428e-05	0.00126312	UP		Pathogenesis-related thaumatin superfamily protein	Pathogenesis-related thaumatin superfamily protein; CONTAINS InterPro DOMAIN/s: Thaumatin, conserved site (InterPro:IPR017949), Thaumatin, pathogenesis-related (InterPro:IPR001938); BEST Arabidopsis thaliana protein match is: Pathogenesis-related thaumatin superfamily protein (TAIR:AT1G75800.1)	Thaumatin | Thaumatin, conserved site	NO
AT1G20140	1.11349	2.91703	8.98445e-12	9.11462e-10	UP		SKP1-like 4	SKP1-like 4 (SK4); CONTAINS InterPro DOMAIN/s: E3 ubiquitin ligase, SCF complex, Skp subunit (InterPro:IPR016897), SKP1 component, dimerisation (InterPro:IPR016072), SKP1 component (InterPro:IPR001232), BTB/POZ fold (InterPro:IPR011333), SKP1 component, POZ (InterPro:IPR016073); BEST Arabidopsis thaliana protein match is: SKP1-like 3 (TAIR:AT2G25700.1)	BTB/POZ fold | E3 ubiquitin ligase, SCF complex, Skp subunit | SKP1 component | SKP1 component, POZ domain | SKP1 component, dimerisation	NO
AT1G20150	5.79098	-0.115619	3.98431e-27	2.63129e-24	UP		Subtilisin-like serine endopeptidase family protein	Subtilisin-like serine endopeptidase family protein; FUNCTIONS IN: identical protein binding, serine-type endopeptidase activity; INVOLVED IN: proteolysis, negative regulation of catalytic activity; LOCATED IN: endomembrane system; EXPRESSED IN: leaf whorl, sepal, root, flower, seed; EXPRESSED DURING: F mature embryo stage, petal differentiation and expansion stage, E expanded cotyledon stage; CO…	Peptidase S8, subtilisin, His-active site | Peptidase S8, subtilisin, Ser-active site | Peptidase S8, subtilisin-related | Peptidase S8/S53 domain | Protease-associated domain, PA | Proteinase inhibitor I9 | Proteinase inhibitor, propeptide	NO
AT1G20190	0.476388	5.40733	0.00359194	0.0270446	UP		expansin 11	expansin 11 (EXPA11); INVOLVED IN: plant-type cell wall modification involved in multidimensional cell growth, unidimensional cell growth, plant-type cell wall loosening; LOCATED IN: cell wall; EXPRESSED IN: 14 plant structures; EXPRESSED DURING: 9 growth stages; CONTAINS InterPro DOMAIN/s: Barwin-related endoglucanase (InterPro:IPR009009), Pollen allergen, N-terminal (InterPro:IPR014734), Expans…	Barwin-like endoglucanase | Expansin | Expansin, cellulose-binding-like domain | Expansin/Lol pI | Expansin/pollen allergen, DPBB domain | RlpA-like double-psi beta-barrel domain	NO
AT1G20350	-1.82933	0.0819267	2.0885e-05	0.000391299	DOWN		translocase inner membrane subunit 17-1	translocase inner membrane subunit 17-1 (TIM17-1); FUNCTIONS IN: protein transporter activity, P-P-bond-hydrolysis-driven protein transmembrane transporter activity; INVOLVED IN: protein transport; LOCATED IN: mitochondrial inner membrane presequence translocase complex; EXPRESSED IN: 11 plant structures; EXPRESSED DURING: 9 growth stages; CONTAINS InterPro DOMAIN/s: Mitochondrial inner membrane …	Mitochondrial inner membrane translocase complex, subunit Tim17 | Mitochondrial inner membrane translocase subunit Tim17/Tim22/Tim23/peroxisomal protein PMP24	NO
AT1G20390	-0.691383	6.12836	6.68619e-09	3.72227e-07	DOWN		transposable element gene	gypsy-like retrotransposon family, has a 1.5e-251 P-value blast match to GB:AAD19359 polyprotein (gypsy_Ty3-element) (Sorghum bicolor)		NO
AT1G20410	0.510521	3.37771	0.00020046	0.00257797	UP		Pseudouridine synthase family protein	Pseudouridine synthase family protein; FUNCTIONS IN: pseudouridine synthase activity, RNA binding; INVOLVED IN: pseudouridine synthesis, RNA modification; LOCATED IN: cellular_component unknown; EXPRESSED IN: 22 plant structures; EXPRESSED DURING: 13 growth stages; CONTAINS InterPro DOMAIN/s: Pseudouridine synthase, catalytic domain (InterPro:IPR020103)	Pseudouridine synthase, catalytic domain	NO
AT1G20430	0.371739	4.09259	0.00319763	0.0246508	UP			unknown protein		NO
AT1G20470	-1.69458	1.64732	8.31295e-18	2.18741e-15	DOWN		SAUR-like auxin-responsive protein family	SAUR-like auxin-responsive protein family ; CONTAINS InterPro DOMAIN/s: Auxin responsive SAUR protein (InterPro:IPR003676); BEST Arabidopsis thaliana protein match is: SAUR-like auxin-responsive protein family (TAIR:AT1G76190.1)	Auxin-induced protein, ARG7	NO
AT1G20530	0.82541	-0.0492149	0.00610541	0.041152	UP		Protein of unknown function (DUF630 and DUF632)	Protein of unknown function (DUF630 and DUF632); FUNCTIONS IN: molecular_function unknown; INVOLVED IN: N-terminal protein myristoylation; LOCATED IN: cellular_component unknown; EXPRESSED IN: shoot apex, embryo, flower; EXPRESSED DURING: petal differentiation and expansion stage, D bilateral stage; CONTAINS InterPro DOMAIN/s: Protein of unknown function DUF630 (InterPro:IPR006868), Protein of un…	Domain of unknown function DUF630 | Domain of unknown function DUF632	NO
AT1G20580	0.452884	5.18907	6.33831e-06	0.000141753	UP	YES	Small nuclear ribonucleoprotein family protein	Small nuclear ribonucleoprotein family protein; FUNCTIONS IN: molecular_function unknown; LOCATED IN: nucleolus, nucleus, small nucleolar ribonucleoprotein complex; EXPRESSED IN: 22 plant structures; EXPRESSED DURING: 13 growth stages; CONTAINS InterPro DOMAIN/s: Like-Sm ribonucleoprotein (LSM) domain (InterPro:IPR001163), Like-Sm ribonucleoprotein (LSM) domain, eukaryotic/archaea-type (InterPro:…	Like-Sm (LSM) domain | Ribonucleoprotein LSM domain | Ribonucleoprotein LSM domain, eukaryotic/archaea-type | U6 snRNA-associated Sm-like protein LSm4/Small nuclear ribonucleoprotein Sm D1/D3	NO
AT1G20610	0.865572	2.81421	0.000919396	0.00904122	UP		Cyclin B2;3	Cyclin B2;3 (CYCB2;3); FUNCTIONS IN: cyclin-dependent protein kinase regulator activity; INVOLVED IN: regulation of cell cycle; LOCATED IN: nucleus; CONTAINS InterPro DOMAIN/s: Cyclin, C-terminal (InterPro:IPR004367), Cyclin-like (InterPro:IPR011028), Cyclin-related (InterPro:IPR013763), Cyclin, N-terminal (InterPro:IPR006671), Cyclin, A/B/D/E (InterPro:IPR014400), Cyclin (InterPro:IPR006670); BE…	Cyclin A/B/D/E/F | Cyclin, C-terminal domain | Cyclin, N-terminal | Cyclin-like	NO
AT1G20620	-0.511634	10.5368	0.00191557	0.0162879	DOWN		catalase 3	catalase 3 (CAT3); FUNCTIONS IN: catalase activity, cobalt ion binding; INVOLVED IN: in 7 processes; LOCATED IN: in 11 components; LOCATED IN: in 9 components; EXPRESSED IN: 29 plant structures; EXPRESSED DURING: 17 growth stages; CONTAINS InterPro DOMAIN/s: Catalase (InterPro:IPR002226), Catalase related subgroup (InterPro:IPR018028), Catalase-like domain, haem-dependent (InterPro:IPR020835), Ca…	Catalase core domain | Catalase haem-binding site | Catalase immune-responsive domain | Catalase, mono-functional, haem-containing | Catalase, mono-functional, haem-containing, clades 1 and 3 | Catalase-like domain	NO
AT1G20693	-0.548122	7.71732	1.79654e-05	0.000344193	DOWN		high mobility group B2	high mobility group B2 (HMGB2); FUNCTIONS IN: chromatin binding, structural constituent of chromatin, DNA binding, sequence-specific DNA binding transcription factor activity; INVOLVED IN: chromatin assembly or disassembly; LOCATED IN: chromatin; EXPRESSED IN: 23 plant structures; EXPRESSED DURING: 13 growth stages; CONTAINS InterPro DOMAIN/s: High mobility group, superfamily (InterPro:IPR009071)…	High mobility group box domain	NO
AT1G20720	1.15932	1.80496	3.86823e-09	2.30616e-07	UP		RAD3-like DNA-binding helicase protein	RAD3-like DNA-binding helicase protein; FUNCTIONS IN: in 6 functions; INVOLVED IN: nucleobase, nucleoside, nucleotide and nucleic acid metabolic process; LOCATED IN: mitochondrion; EXPRESSED IN: 8 plant structures; EXPRESSED DURING: 4 anthesis, F mature embryo stage, petal differentiation and expansion stage, E expanded cotyledon stage, D bilateral stage; CONTAINS InterPro DOMAIN/s: DEAD2 (InterP…	ATP-dependent helicase, C-terminal | DEAD2 | Helicase, superfamily 1/2, ATP-binding domain, DinG/Rad3-type | Helicase-like, DEXD box c2 type | P-loop containing nucleoside triphosphate hydrolase	NO
AT1G20810	-0.310308	5.47712	0.00102953	0.00989032	DOWN		FKBP-like peptidyl-prolyl cis-trans isomerase family protein	FKBP-like peptidyl-prolyl cis-trans isomerase family protein; FUNCTIONS IN: FK506 binding, peptidyl-prolyl cis-trans isomerase activity; INVOLVED IN: protein folding; LOCATED IN: thylakoid lumen, chloroplast thylakoid lumen, chloroplast; EXPRESSED IN: 21 plant structures; EXPRESSED DURING: 13 growth stages; CONTAINS InterPro DOMAIN/s: Peptidyl-prolyl cis-trans isomerase, FKBP-type (InterPro:IPR00…	Peptidyl-prolyl cis-trans isomerase, FKBP-type | Peptidyl-prolyl cis-trans isomerase, FKBP-type, domain	NO
AT1G20910	0.375405	3.92859	0.0045226	0.0323753	UP		ARID/BRIGHT DNA-binding domain-containing protein	ARID/BRIGHT DNA-binding domain-containing protein; FUNCTIONS IN: sequence-specific DNA binding transcription factor activity; INVOLVED IN: regulation of transcription; LOCATED IN: intracellular; EXPRESSED IN: 19 plant structures; EXPRESSED DURING: 7 growth stages; CONTAINS InterPro DOMAIN/s: Heat shock protein Hsp20 (InterPro:IPR002068), HSP20-like chaperone (InterPro:IPR008978), ARID/BRIGHT DNA-…	ARID/BRIGHT DNA-binding domain | Alpha crystallin/Hsp20 domain | HSP20-like chaperone	NO
AT1G20930	0.581914	2.41562	0.00313122	0.0242443	UP		cyclin-dependent kinase B2;2	cyclin-dependent kinase B2;2 (CDKB2;2); CONTAINS InterPro DOMAIN/s: Protein kinase, ATP binding site (InterPro:IPR017441), Protein kinase, catalytic domain (InterPro:IPR000719), Serine/threonine-protein kinase domain (InterPro:IPR002290), Serine/threonine-protein kinase-like domain (InterPro:IPR017442), Protein kinase-like domain (InterPro:IPR011009), Serine/threonine-protein kinase, active site …	Protein kinase domain | Protein kinase, ATP binding site | Protein kinase-like domain | Serine/threonine-protein kinase, active site | Serine/threonine/dual specificity protein kinase, catalytic domain	NO
AT1G21070	0.491467	2.76463	0.00144823	0.0130457	UP		Nucleotide-sugar transporter family protein	Nucleotide-sugar transporter family protein; CONTAINS InterPro DOMAIN/s: Protein of unknown function DUF250 (InterPro:IPR004853); BEST Arabidopsis thaliana protein match is: Nucleotide-sugar transporter family protein (TAIR:AT1G76670.1)	Triose-phosphate transporter domain	NO
AT1G21140	-1.71082	-1.01852	0.000177885	0.00233399	DOWN		Vacuolar iron transporter (VIT) family protein	Vacuolar iron transporter (VIT) family protein; CONTAINS InterPro DOMAIN/s: Protein of unknown function DUF125, transmembrane (InterPro:IPR008217); BEST Arabidopsis thaliana protein match is: Vacuolar iron transporter (VIT) family protein (TAIR:AT3G43660.1)	Domain of unknown function DUF125, transmembrane	NO
AT1G21170	0.366113	4.71287	0.000275831	0.00337337	UP		Exocyst complex component SEC5	SEC5B; BEST Arabidopsis thaliana protein match is: exocyst complex component sec5 (TAIR:AT1G76850.1)	Cullin repeat-like-containing domain | Exocyst complex component Sec5	NO
AT1G21250	-1.88775	2.33777	1.57557e-05	0.000308051	DOWN		cell wall-associated kinase	cell wall-associated kinase (WAK1); FUNCTIONS IN: kinase activity; INVOLVED IN: cell surface receptor linked signaling pathway, response to virus, defense response to fungus, response to salicylic acid stimulus; LOCATED IN: plasma membrane, vacuole, plant-type cell wall; EXPRESSED IN: 21 plant structures; EXPRESSED DURING: 13 growth stages; CONTAINS InterPro DOMAIN/s: EGF-like calcium-binding (In…	Concanavalin A-like lectin/glucanase, subgroup | EGF-like calcium-binding domain | EGF-like calcium-binding, conserved site | EGF-type aspartate/asparagine hydroxylation site | Epidermal growth factor-like domain | Protein kinase domain | Protein kinase-like domain | Serine/threonine-protein kinase, active site | Wall-associated receptor kinase galacturonan-binding domain	NO
AT1G21270	-0.90122	2.66597	0.00430166	0.031082	DOWN		wall-associated kinase 2	wall-associated kinase 2 (WAK2); FUNCTIONS IN: protein serine/threonine kinase activity, protein kinase activity, calcium ion binding, ATP binding; INVOLVED IN: cellular water homeostasis, protein amino acid phosphorylation, oligosaccharide metabolic process, unidimensional cell growth, response to salicylic acid stimulus; LOCATED IN: plasma membrane; EXPRESSED IN: 18 plant structures; EXPRESSED …	Concanavalin A-like lectin/glucanase, subgroup | EGF-like calcium-binding domain | EGF-like calcium-binding, conserved site | EGF-like, conserved site | EGF-type aspartate/asparagine hydroxylation site | Epidermal growth factor-like domain | Protein kinase domain | Protein kinase-like domain | Serine/threonine-protein kinase, active site | Wall-associated receptor kinase galacturonan-binding doma…	NO
AT1G21350	-0.770719	5.37074	3.15839e-15	6.0442e-13	DOWN		Thioredoxin superfamily protein	Thioredoxin superfamily protein; FUNCTIONS IN: oxidoreductase activity, antioxidant activity; INVOLVED IN: cell redox homeostasis; LOCATED IN: chloroplast; EXPRESSED IN: 22 plant structures; CONTAINS InterPro DOMAIN/s: Thioredoxin fold (InterPro:IPR012335), Alkyl hydroperoxide reductase/ Thiol specific antioxidant/ Mal allergen (InterPro:IPR000866), Thioredoxin-like fold (InterPro:IPR012336); EXP…	Alkyl hydroperoxide reductase subunit C/ Thiol specific antioxidant | Thioredoxin-like fold	NO
AT1G21460	0.614691	4.97861	9.7602e-06	0.000205202	UP		Nodulin MtN3 family protein	Nodulin MtN3 family protein; INVOLVED IN: biological_process unknown; LOCATED IN: endomembrane system, integral to membrane, membrane; EXPRESSED IN: 24 plant structures; EXPRESSED DURING: 14 growth stages; CONTAINS InterPro DOMAIN/s: MtN3/saliva-related transmembrane protein, conserved region (InterPro:IPR018169), RAG1-activating protein 1 homologue (InterPro:IPR018179), RAG1-activating protein-1…		NO
AT1G21500	-0.302657	7.76267	0.000900038	0.00887937	DOWN			unknown protein		NO
AT1G21670	0.590763	5.74499	6.39943e-07	2.02765e-05	UP			LOCATED IN: cell wall, plant-type cell wall; EXPRESSED IN: 23 plant structures; EXPRESSED DURING: 14 growth stages; CONTAINS InterPro DOMAIN/s: WD40-like Beta Propeller (InterPro:IPR011659), Six-bladed beta-propeller, TolB-like (InterPro:IPR011042); BEST Arabidopsis thaliana protein match is: DPP6 N-terminal domain-like protein (TAIR:AT1G21680.1)	WD40-like Beta Propeller | WD40/YVTN repeat-like-containing domain	NO
AT1G21690	0.334301	4.11564	0.00372708	0.0278465	UP		ATPase family associated with various cellular activities (AAA)	embryo defective 1968 (EMB1968); FUNCTIONS IN: in 6 functions; INVOLVED IN: embryo development ending in seed dormancy; LOCATED IN: DNA replication factor C complex; LOCATED IN: DNA replication factor C complex, nucleolus; EXPRESSED IN: 24 plant structures; EXPRESSED DURING: 13 growth stages; CONTAINS InterPro DOMAIN/s: ATPase, AAA+ type, core (InterPro:IPR003593), ATPase, AAA-type, core (InterPr…	AAA+ ATPase domain | ATPase, AAA-type, core | DNA polymerase III, clamp loader complex, gamma/delta/delta subunit, C-terminal | P-loop containing nucleoside triphosphate hydrolase | Replication factor C, C-terminal domain	NO
AT1G21710	0.442826	3.81084	0.000540091	0.00584162	UP		8-oxoguanine-DNA glycosylase 1	8-oxoguanine-DNA glycosylase 1 (OGG1); FUNCTIONS IN: oxidized purine base lesion DNA N-glycosylase activity; INVOLVED IN: DNA repair, base-excision repair; LOCATED IN: chloroplast; EXPRESSED IN: 22 plant structures; EXPRESSED DURING: 14 growth stages; CONTAINS InterPro DOMAIN/s: DNA glycosylase (InterPro:IPR011257), Helix-hairpin-helix DNA-binding motif, class 1 (InterPro:IPR003583), Transcriptio…	8-oxoguanine DNA glycosylase, N-terminal | DNA glycosylase | Helix-hairpin-helix DNA-binding motif, class 1 | Helix-turn-helix, base-excision DNA repair, C-terminal | HhH-GPD domain	NO
AT1G21760	-0.305629	5.28364	0.00256671	0.0206373	DOWN		F-box protein 7	F-box protein 7 (FBP7); CONTAINS InterPro DOMAIN/s: F-box domain, cyclin-like (InterPro:IPR001810), F-box domain, Skp2-like (InterPro:IPR022364)	F-box domain	NO
AT1G21830	0.472692	5.2004	0.00023252	0.00292111	UP			unknown protein; CONTAINS InterPro DOMAIN/s: Protein of unknown function DUF740 (InterPro:IPR008004); BEST Arabidopsis thaliana protein match is: unknown protein (TAIR:AT1G44608.1)	Uncharacterised protein family UPF0503	NO
AT1G21840	0.448055	3.10219	0.00117115	0.0109754	UP		urease accessory protein F	urease accessory protein F (UREF); FUNCTIONS IN: nickel ion binding; INVOLVED IN: nitrogen compound metabolic process, positive regulation of metalloenzyme activity; LOCATED IN: cellular_component unknown; EXPRESSED IN: 23 plant structures; EXPRESSED DURING: 13 growth stages; CONTAINS InterPro DOMAIN/s: Urease accessory protein UreF (InterPro:IPR002639)	Urease accessory protein UreF	NO
AT1G22060	0.321123	6.06349	0.000977921	0.00950024	UP			LOCATED IN: vacuole; EXPRESSED IN: 23 plant structures; EXPRESSED DURING: 13 growth stages; BEST Arabidopsis thaliana protein match is: FBD, F-box and Leucine Rich Repeat domains containing protein (TAIR:AT1G22000.1)	EEIG1/EHBP1 N-terminal domain	NO
AT1G22120	-5.42773	-3.14127	9.18753e-05	0.00135484	DOWN			unknown protein		NO
AT1G22160	-0.677304	4.51391	3.00932e-05	0.000533681	DOWN		Protein of unknown function (DUF581)	Protein of unknown function (DUF581); CONTAINS InterPro DOMAIN/s: Protein of unknown function DUF581 (InterPro:IPR007650); BEST Arabidopsis thaliana protein match is: Protein of unknown function (DUF581) (TAIR:AT1G78020.1)	zf-FLZ domain	NO
AT1G22170	0.564124	2.73569	0.00153615	0.0136912	UP		Phosphoglycerate mutase family protein	Phosphoglycerate mutase family protein; FUNCTIONS IN: intramolecular transferase activity, phosphotransferases, catalytic activity; INVOLVED IN: glycolysis, metabolic process; LOCATED IN: chloroplast; EXPRESSED IN: 19 plant structures; EXPRESSED DURING: 8 growth stages; CONTAINS InterPro DOMAIN/s: Histidine phosphatase superfamily, clade-1 (InterPro:IPR013078), Phosphoglycerate/bisphosphoglycerat…	Histidine phosphatase superfamily | Histidine phosphatase superfamily, clade-1 | Phosphoglycerate mutase 1 | Phosphoglycerate/bisphosphoglycerate mutase, active site	NO
AT1G22180	0.371986	3.5097	0.00405972	0.0297462	UP		Sec14p-like phosphatidylinositol transfer family protein	Sec14p-like phosphatidylinositol transfer family protein; CONTAINS InterPro DOMAIN/s: Cellular retinaldehyde-binding/triple function, C-terminal (InterPro:IPR001251); CONTAINS InterPro DOMAIN/s: Cellular retinaldehyde-binding/triple function, C-terminal (InterPro:IPR001251), Cellular retinaldehyde-binding/triple function, N-terminal (InterPro:IPR008273), Phosphatidylinositol transfer protein-like…	CRAL-TRIO domain | CRAL/TRIO, N-terminal domain	NO
AT1G22270	0.544608	3.89785	1.6451e-05	0.000320651	UP		Trm112p-like protein	Trm112p-like protein; CONTAINS InterPro DOMAIN/s: Protein of unknown function DUF343 (InterPro:IPR005651); BEST Arabidopsis thaliana protein match is: Trm112p-like protein (TAIR:AT1G78190.1)	Uncharacterised protein family UPF0434/Trm112	NO
AT1G22275	0.973559	0.673602	0.000177273	0.00232777	UP		Myosin heavy chain-related protein	ZYP1b; BEST Arabidopsis thaliana protein match is: Myosin heavy chain-related protein (TAIR:AT1G22260.1)		NO
AT1G22310	-0.462496	3.93924	9.62232e-05	0.0014097	DOWN		methyl-CPG-binding domain 8	methyl-CPG-binding domain 8 (MBD8); FUNCTIONS IN: methyl-CpG binding; INVOLVED IN: biological_process unknown; LOCATED IN: nucleus; EXPRESSED IN: 23 plant structures; EXPRESSED DURING: 13 growth stages; CONTAINS InterPro DOMAIN/s: A.T hook-like (InterPro:IPR020478), AT hook, DNA-binding motif (InterPro:IPR017956), DNA-binding, integrase-type (InterPro:IPR016177), Methyl-CpG DNA binding (InterPro:…	AT hook, DNA-binding motif | DNA-binding domain | Methyl-CpG DNA binding	NO
AT1G22370	0.428729	5.43933	7.79693e-05	0.00118399	UP		UDP-glucosyl transferase 85A5	UDP-glucosyl transferase 85A5 (UGT85A5); FUNCTIONS IN: transferase activity, transferring glycosyl groups, glucuronosyltransferase activity; INVOLVED IN: metabolic process; EXPRESSED IN: 15 plant structures; EXPRESSED DURING: 9 growth stages; CONTAINS InterPro DOMAIN/s: UDP-glucuronosyl/UDP-glucosyltransferase (InterPro:IPR002213); BEST Arabidopsis thaliana protein match is: UDP-glucosyl transfer…	UDP-glucuronosyl/UDP-glucosyltransferase	NO
AT1G22410	0.350502	6.56267	0.00680797	0.0446803	UP		Class-II DAHP synthetase family protein	Class-II DAHP synthetase family protein; FUNCTIONS IN: 3-deoxy-7-phosphoheptulonate synthase activity; INVOLVED IN: aromatic amino acid family biosynthetic process; LOCATED IN: membrane; EXPRESSED IN: 23 plant structures; EXPRESSED DURING: 15 growth stages; CONTAINS InterPro DOMAIN/s: DAHP synthetase, class II (InterPro:IPR002480); BEST Arabidopsis thaliana protein match is: 3-deoxy-D-arabino-hep…	DAHP synthetase, class II	NO
AT1G22430	-0.281887	6.75946	0.00593951	0.0402108	DOWN		GroES-like zinc-binding dehydrogenase family protein	GroES-like zinc-binding dehydrogenase family protein; FUNCTIONS IN: oxidoreductase activity, zinc ion binding; INVOLVED IN: oxidation reduction; LOCATED IN: cellular_component unknown; EXPRESSED IN: 21 plant structures; EXPRESSED DURING: 13 growth stages; CONTAINS InterPro DOMAIN/s: GroES-like (InterPro:IPR011032), Alcohol dehydrogenase GroES-like (InterPro:IPR013154), Alcohol dehydrogenase, zinc…	Alcohol dehydrogenase GroES-like | Alcohol dehydrogenase superfamily, zinc-type | Alcohol dehydrogenase, C-terminal | Alcohol dehydrogenase, zinc-type, conserved site | GroES (chaperonin 10)-like | NAD(P)-binding domain	NO
AT1G22450	0.317275	5.74306	0.000921172	0.00904812	UP		cytochrome C oxidase 6B	cytochrome C oxidase 6B (COX6B); FUNCTIONS IN: cytochrome-c oxidase activity, copper ion binding; INVOLVED IN: oxidation reduction, response to salt stress; LOCATED IN: thylakoid, mitochondrion, chloroplast thylakoid membrane, chloroplast; EXPRESSED IN: 24 plant structures; EXPRESSED DURING: 17 growth stages; CONTAINS InterPro DOMAIN/s: Cytochrome c oxidase, subunit VIb (InterPro:IPR003213); BEST…	Cytochrome c oxidase, subunit VIb	NO
AT1G22490	1.24874	1.22493	2.77435e-06	7.06829e-05	UP		basic helix-loop-helix (bHLH) DNA-binding superfamily protein	basic helix-loop-helix (bHLH) DNA-binding superfamily protein; FUNCTIONS IN: DNA binding, sequence-specific DNA binding transcription factor activity; INVOLVED IN: regulation of transcription; LOCATED IN: nucleus; EXPRESSED IN: 17 plant structures; EXPRESSED DURING: 8 growth stages; CONTAINS InterPro DOMAIN/s: Helix-loop-helix DNA-binding domain (InterPro:IPR001092), Helix-loop-helix DNA-binding …	Myc-type, basic helix-loop-helix (bHLH) domain	NO
AT1G22550	-0.424107	3.70248	0.00316887	0.0244739	DOWN		Major facilitator superfamily protein	Major facilitator superfamily protein; FUNCTIONS IN: transporter activity; INVOLVED IN: oligopeptide transport; LOCATED IN: membrane; EXPRESSED IN: 19 plant structures; EXPRESSED DURING: 9 growth stages; CONTAINS InterPro DOMAIN/s: PTR2 family proton/oligopeptide symporter, conserved site (InterPro:IPR018456), Oligopeptide transporter (InterPro:IPR000109), Major facilitator superfamily, general s…	Major facilitator superfamily domain, general substrate transporter | PTR2 family proton/oligopeptide symporter, conserved site | Proton-dependent oligopeptide transporter family	NO
AT1G22590	-0.805258	4.03515	5.48301e-11	4.83438e-09	DOWN		AGAMOUS-like 87	AGAMOUS-like 87 (AGL87); FUNCTIONS IN: sequence-specific DNA binding transcription factor activity; INVOLVED IN: regulation of transcription; LOCATED IN: nucleus; EXPRESSED IN: 19 plant structures; EXPRESSED DURING: 13 growth stages; CONTAINS InterPro DOMAIN/s: Transcription factor, MADS-box (InterPro:IPR002100); BEST Arabidopsis thaliana protein match is: MADS-box transcription factor family pro…	Transcription factor, MADS-box	NO
AT1G22640	0.460404	6.81765	0.00564563	0.0386563	UP		myb domain protein 3	myb domain protein 3 (MYB3); CONTAINS InterPro DOMAIN/s: SANT, DNA-binding (InterPro:IPR001005), Homeodomain-like (InterPro:IPR009057), Myb, DNA-binding (InterPro:IPR014778), HTH transcriptional regulator, Myb-type, DNA-binding (InterPro:IPR017930), Homeodomain-related (InterPro:IPR012287), Myb transcription factor (InterPro:IPR015495); BEST Arabidopsis thaliana protein match is: myb domain prote…	Homeodomain-like | Myb domain | SANT/Myb domain	NO
AT1G22690	-0.62492	6.41654	0.000117711	0.00166302	DOWN		Gibberellin-regulated family protein	Gibberellin-regulated family protein; FUNCTIONS IN: molecular_function unknown; INVOLVED IN: response to gibberellin stimulus; LOCATED IN: endomembrane system; EXPRESSED IN: 18 plant structures; EXPRESSED DURING: 10 growth stages; CONTAINS InterPro DOMAIN/s: Gibberellin regulated protein (InterPro:IPR003854); BEST Arabidopsis thaliana protein match is: Gibberellin-regulated family protein (TAIR:A…	Gibberellin regulated protein	NO
AT1G22750	-0.406564	6.06102	9.40326e-05	0.00138181	DOWN			unknown protein; CONTAINS InterPro DOMAIN/s: Protein of unknown function DUF1475 (InterPro:IPR009943); FUNCTIONS IN: molecular_function unknown; INVOLVED IN: biological_process unknown; LOCATED IN: vacuole; EXPRESSED IN: 23 plant structures; EXPRESSED DURING: 15 growth stages	Protein of unknown function DUF1475	NO
AT1G22780	0.363519	6.32691	0.000249533	0.00309788	UP		Ribosomal protein S13/S18 family	POINTED FIRST LEAVES (PFL); FUNCTIONS IN: structural constituent of ribosome, RNA binding, nucleic acid binding; INVOLVED IN: translational initiation, translation; LOCATED IN: cytosolic small ribosomal subunit, ribosome, small ribosomal subunit, cell wall, plasma membrane; EXPRESSED IN: 23 plant structures; EXPRESSED DURING: 13 growth stages; CONTAINS InterPro DOMAIN/s: Ribosomal protein S13-lik…	30s ribosomal protein S13, C-terminal | Ribosomal protein S13 | Ribosomal protein S13, conserved site | Ribosomal protein S13-like, H2TH	NO
AT1G22800	0.359992	3.75462	0.00422188	0.0306195	UP		S-adenosyl-L-methionine-dependent methyltransferases superfamily protein	S-adenosyl-L-methionine-dependent methyltransferases superfamily protein; FUNCTIONS IN: methyltransferase activity; INVOLVED IN: metabolic process; LOCATED IN: cellular_component unknown; EXPRESSED IN: 23 plant structures; EXPRESSED DURING: 16 growth stages; CONTAINS InterPro DOMAIN/s: Methyltransferase type 11 (InterPro:IPR013216)	Methyltransferase type 11 | S-adenosyl-L-methionine-dependent methyltransferase-like	NO
AT1G22850	-0.293864	7.65458	0.00250799	0.0202764	DOWN		SNARE associated Golgi protein family	SNARE associated Golgi protein family; INVOLVED IN: biological_process unknown; LOCATED IN: chloroplast; EXPRESSED IN: 22 plant structures; EXPRESSED DURING: 15 growth stages; CONTAINS InterPro DOMAIN/s: SNARE associated Golgi protein (InterPro:IPR015414); BEST Arabidopsis thaliana protein match is: SNARE associated Golgi protein family (TAIR:AT1G03260.1)	SNARE associated Golgi protein	NO
AT1G22910	0.443697	4.73956	0.000234712	0.00294316	UP		RNA-binding (RRM/RBD/RNP motifs) family protein	RNA-binding (RRM/RBD/RNP motifs) family protein; FUNCTIONS IN: RNA binding, nucleotide binding, nucleic acid binding; INVOLVED IN: biological_process unknown; LOCATED IN: cellular_component unknown; EXPRESSED IN: 22 plant structures; EXPRESSED DURING: 13 growth stages; CONTAINS InterPro DOMAIN/s: RNA recognition motif, RNP-1 (InterPro:IPR000504), Nucleotide-binding, alpha-beta plait (InterPro:IPR…	Nucleotide-binding, alpha-beta plait | RNA recognition motif domain	NO
AT1G23052	0.624014	5.38465	4.55527e-07	1.50862e-05	UP					NO
AT1G23060	-0.669229	2.18507	0.00711334	0.0462786	DOWN			BEST Arabidopsis thaliana protein match is: TPX2 (targeting protein for Xklp2) protein family (TAIR:AT1G70950.1)		NO
AT1G23100	1.14899	1.29701	2.89667e-06	7.35766e-05	UP		GroES-like family protein	GroES-like family protein; FUNCTIONS IN: ATP binding; INVOLVED IN: protein folding; LOCATED IN: mitochondrion; EXPRESSED IN: 19 plant structures; EXPRESSED DURING: 11 growth stages; CONTAINS InterPro DOMAIN/s: Chaperonin Cpn10 (InterPro:IPR020818), GroES-like (InterPro:IPR011032), Chaperonin Cpn10, conserved site (InterPro:IPR018369), Chaperonin Cpn10, subgroup (InterPro:IPR001476); BEST Arabidop…	Chaperonin Cpn10 | Chaperonin Cpn10, conserved site | GroES (chaperonin 10)-like	NO
AT1G23130	-0.764791	8.38757	3.25606e-08	1.49411e-06	DOWN		Polyketide cyclase/dehydrase and lipid transport superfamily protein	Polyketide cyclase/dehydrase and lipid transport superfamily protein; FUNCTIONS IN: molecular_function unknown; INVOLVED IN: response to biotic stimulus, defense response; LOCATED IN: cellular_component unknown; EXPRESSED IN: 15 plant structures; EXPRESSED DURING: 10 growth stages; CONTAINS InterPro DOMAIN/s: Bet v I allergen (InterPro:IPR000916); BEST Arabidopsis thaliana protein match is: MLP-l…	Bet v I domain | Major latex protein domain | START-like domain	NO
AT1G23170	0.614254	1.94063	0.00193107	0.0163954	UP		Protein of unknown function DUF2359, transmembrane	Protein of unknown function DUF2359, transmembrane; FUNCTIONS IN: molecular_function unknown; INVOLVED IN: biological_process unknown; CONTAINS InterPro DOMAIN/s: Protein of unknown function DUF2359, transmembrane (InterPro:IPR019308); LOCATED IN: membrane; BEST Arabidopsis thaliana protein match is: Protein of unknown function DUF2359, transmembrane (TAIR:AT1G70770.2); EXPRESSED IN: leaf	Protein of unknown function DUF2359, TMEM214	NO
AT1G23280	0.587077	4.13243	3.30755e-05	0.000580519	UP		MAK16 protein-related	MAK16 protein-related; CONTAINS InterPro DOMAIN/s: Mak16 protein (InterPro:IPR006958)	Mak16 protein | Ribosomal L28e/Mak16	NO
AT1G23290	0.626646	6.86338	2.82586e-11	2.63651e-09	UP		Ribosomal protein L18e/L15 superfamily protein	RPL27AB; FUNCTIONS IN: structural constituent of ribosome; INVOLVED IN: translation; LOCATED IN: cytosolic ribosome, ribosome, cytosolic large ribosomal subunit, nucleolus, large ribosomal subunit; EXPRESSED IN: 23 plant structures; EXPRESSED DURING: 13 growth stages; CONTAINS InterPro DOMAIN/s: Ribosomal protein L18e/L15 (InterPro:IPR021131), Ribosomal protein L15, conserved site (InterPro:IPR00…	Ribosomal protein L15, conserved site | Ribosomal protein L18e/L15P	NO
AT1G23310	-0.447507	11.6264	5.09287e-07	1.66861e-05	DOWN		glutamate:glyoxylate aminotransferase	glutamate:glyoxylate aminotransferase (GGT1); FUNCTIONS IN: glycine:2-oxoglutarate aminotransferase activity, L-alanine:2-oxoglutarate aminotransferase activity, alanine-glyoxylate transaminase activity; INVOLVED IN: photorespiration; LOCATED IN: apoplast, chloroplast, peroxisome, vacuole, membrane; LOCATED IN: apoplast, peroxisome, chloroplast, vacuole, membrane; EXPRESSED IN: 23 plant structure…	Aminotransferase, class I/classII | Pyridoxal phosphate-dependent transferase | Pyridoxal phosphate-dependent transferase, major region, subdomain 1 | Pyridoxal phosphate-dependent transferase, major region, subdomain 2	NO
AT1G23390	0.839597	9.0557	2.47143e-07	8.86477e-06	UP		Kelch repeat-containing F-box family protein	Kelch repeat-containing F-box family protein; CONTAINS InterPro DOMAIN/s: F-box domain, cyclin-like (InterPro:IPR001810), F-box domain, Skp2-like (InterPro:IPR022364), Galactose oxidase/kelch, beta-propeller (InterPro:IPR011043), Kelch-type beta propeller (InterPro:IPR015915); BEST Arabidopsis thaliana protein match is: Galactose oxidase/kelch repeat superfamily protein (TAIR:AT3G24760.1)	F-box domain | Galactose oxidase, beta-propeller	NO
AT1G23410	0.995833	1.88862	3.3678e-06	8.27962e-05	UP		Ribosomal protein S27a / Ubiquitin family protein	Ribosomal protein S27a / Ubiquitin family protein; FUNCTIONS IN: structural constituent of ribosome; INVOLVED IN: protein ubiquitination involved in ubiquitin-dependent protein catabolic process, translation; LOCATED IN: cytosolic small ribosomal subunit, plasma membrane; EXPRESSED IN: 21 plant structures; EXPRESSED DURING: 11 growth stages; CONTAINS InterPro DOMAIN/s: Ubiquitin subgroup (InterPr…	Ribosomal protein S27a | Ubiquitin | Ubiquitin conserved site | Ubiquitin-like | Ubiquitin-related domain | Zinc-binding ribosomal protein	NO
AT1G23450	1.18157	0.630156	4.56628e-06	0.000107176	UP		Tetratricopeptide repeat (TPR)-like superfamily protein	Tetratricopeptide repeat (TPR)-like superfamily protein; LOCATED IN: mitochondrion; EXPRESSED IN: root, pedicel; EXPRESSED DURING: 4 anthesis; CONTAINS InterPro DOMAIN/s: Pentatricopeptide repeat (InterPro:IPR002885); BEST Arabidopsis thaliana protein match is: pentatricopeptide (PPR) repeat-containing protein (TAIR:AT1G74600.1)		YES	1:8325808:G-GT;exonic_variant&protein_coding,1:8325810:C-T;protein_coding;sense;GCC>GCT;A>A
AT1G23460	0.463364	2.93532	0.00525684	0.0364633	UP		Pectin lyase-like superfamily protein	Pectin lyase-like superfamily protein; FUNCTIONS IN: polygalacturonase activity; INVOLVED IN: carbohydrate metabolic process; LOCATED IN: endomembrane system; CONTAINS InterPro DOMAIN/s: Pectin lyase fold/virulence factor (InterPro:IPR011050), Pectin lyase fold (InterPro:IPR012334), Parallel beta-helix repeat (InterPro:IPR006626), Glycoside hydrolase, family 28 (InterPro:IPR000743); BEST Arabidop…	Glycoside hydrolase, family 28 | Parallel beta-helix repeat | Pectin lyase fold | Pectin lyase fold/virulence factor	NO
AT1G23730	-1.09464	3.80052	0.00541696	0.0374177	DOWN		beta carbonic anhydrase 3	beta carbonic anhydrase 3 (BCA3); FUNCTIONS IN: carbonate dehydratase activity, zinc ion binding; INVOLVED IN: carbon utilization; LOCATED IN: cytosol, plasma membrane, membrane; EXPRESSED IN: 14 plant structures; EXPRESSED DURING: 6 growth stages; CONTAINS InterPro DOMAIN/s: Carbonic anhydrase, prokaryotic-like, conserved site (InterPro:IPR015892), Carbonic anhydrase (InterPro:IPR001765); BEST A…	Carbonic anhydrase | Carbonic anhydrase, prokaryotic-like, conserved site	NO
AT1G23740	-0.40216	8.25379	2.99225e-05	0.000531289	DOWN		Oxidoreductase, zinc-binding dehydrogenase family protein	Oxidoreductase, zinc-binding dehydrogenase family protein; FUNCTIONS IN: oxidoreductase activity, zinc ion binding; INVOLVED IN: response to cold; LOCATED IN: in 6 components; EXPRESSED IN: 22 plant structures; EXPRESSED DURING: 14 growth stages; CONTAINS InterPro DOMAIN/s: GroES-like (InterPro:IPR011032), Alcohol dehydrogenase GroES-like (InterPro:IPR013154), Quinone oxidoreductase/zeta-crystall…	Alcohol dehydrogenase GroES-like | Alcohol dehydrogenase superfamily, zinc-type | GroES (chaperonin 10)-like | NAD(P)-binding domain | Quinone oxidoreductase/zeta-crystallin, conserved site	NO
AT1G23750	-0.573898	2.76069	0.000235808	0.00295471	DOWN		Nucleic acid-binding, OB-fold-like protein	Nucleic acid-binding, OB-fold-like protein; CONTAINS InterPro DOMAIN/s: Nucleic acid-binding, OB-fold-like (InterPro:IPR016027), Nucleic acid-binding, OB-fold (InterPro:IPR012340); BEST Arabidopsis thaliana protein match is: Nucleic acid-binding, OB-fold-like protein (TAIR:AT1G10590.2)	Nucleic acid-binding, OB-fold	NO
AT1G23760	0.949065	0.652912	0.00161483	0.0142268	UP		BURP domain-containing protein	JP630; CONTAINS InterPro DOMAIN/s: BURP (InterPro:IPR004873); BEST Arabidopsis thaliana protein match is: polygalacturonase 2 (TAIR:AT1G70370.2)	BURP domain	NO
AT1G23790	1.1065	1.40382	8.03245e-07	2.455e-05	UP		Plant protein of unknown function (DUF936)	Plant protein of unknown function (DUF936); CONTAINS InterPro DOMAIN/s: Protein of unknown function DUF936, plant (InterPro:IPR010341); BEST Arabidopsis thaliana protein match is: Plant protein of unknown function (DUF936) (TAIR:AT1G70340.1)	Protein of unknown function DUF936, plant	NO
AT1G23840	-1.43778	0.663079	9.97467e-06	0.000209058	DOWN			unknown protein; LOCATED IN: endomembrane system; EXPRESSED IN: 18 plant structures; EXPRESSED DURING: 12 growth stages; BEST Arabidopsis thaliana protein match is: unknown protein (TAIR:AT1G23850.1)		NO
AT1G23870	0.614329	6.63568	1.64962e-08	8.25568e-07	UP		trehalose-phosphatase/synthase 9	trehalose-phosphatase/synthase 9 (TPS9); FUNCTIONS IN: transferase activity, transferring glycosyl groups, trehalose-phosphatase activity; INVOLVED IN: trehalose biosynthetic process, metabolic process; EXPRESSED IN: 27 plant structures; EXPRESSED DURING: 15 growth stages; CONTAINS InterPro DOMAIN/s: HAD-superfamily hydrolase, subfamily IIB (InterPro:IPR006379), Glycosyl transferase, family 20 (I…	Glycosyl transferase, family 20 | HAD-like domain | HAD-superfamily hydrolase, subfamily IIB | Trehalose-phosphatase	NO
AT1G23960	-0.737444	5.54564	1.50875e-12	1.76445e-10	DOWN		Protein of unknown function (DUF626)	Protein of unknown function (DUF626); CONTAINS InterPro DOMAIN/s: Protein of unknown function DUF626, Arabidopsis thaliana (InterPro:IPR006462); BEST Arabidopsis thaliana protein match is: Protein of unknown function (DUF626) (TAIR:AT1G23970.1)	Protein of unknown function DUF626, Arabidopsis thaliana	NO
AT1G23970	-0.60596	3.03449	9.13262e-05	0.0013491	DOWN		Protein of unknown function (DUF626)	Protein of unknown function (DUF626); CONTAINS InterPro DOMAIN/s: Protein of unknown function DUF626, Arabidopsis thaliana (InterPro:IPR006462); BEST Arabidopsis thaliana protein match is: Protein of unknown function (DUF626) (TAIR:AT1G23950.2); BEST Arabidopsis thaliana protein match is: Protein of unknown function (DUF626) (TAIR:AT1G23950.3)	Protein of unknown function DUF626, Arabidopsis thaliana	NO
AT1G24050	0.34283	5.76414	0.000630509	0.00663423	UP		RNA-processing, Lsm domain	RNA-processing, Lsm domain; CONTAINS InterPro DOMAIN/s: RNA-processing, Lsm domain (InterPro:IPR019181); BEST Arabidopsis thaliana protein match is: RNA-processing, Lsm domain (TAIR:AT1G70220.1)	Anticodon-binding domain	NO
AT1G24090	2.25648	0.500423	8.80399e-15	1.58571e-12	UP		RNase H family protein	RNase H family protein; FUNCTIONS IN: ribonuclease H activity, nucleic acid binding; INVOLVED IN: biological_process unknown; EXPRESSED IN: 11 plant structures; EXPRESSED DURING: 6 growth stages; CONTAINS InterPro DOMAIN/s: Ribosomal protein L9/RNase H1, N-terminal (InterPro:IPR009027), Polynucleotidyl transferase, ribonuclease H fold (InterPro:IPR012337), Ribonuclease H (InterPro:IPR002156); BES…	Ribonuclease H domain | Ribonuclease H-like domain | Ribonuclease H1, N-terminal | Ribosomal protein L9/RNase H1, N-terminal	NO
AT1G24095	0.649897	0.559507	0.00661561	0.0437694	UP		Putative thiol-disulphide oxidoreductase DCC	Putative thiol-disulphide oxidoreductase DCC; LOCATED IN: mitochondrion; CONTAINS InterPro DOMAIN/s: Putative thiol-disulphide oxidoreductase DCC (InterPro:IPR007263); BEST Arabidopsis thaliana protein match is: Putative thiol-disulphide oxidoreductase DCC (TAIR:AT1G52590.1)	Protein of unknown function DUF393	NO
AT1G24148	-0.550278	5.08889	2.22237e-07	8.0659e-06	DOWN			unknown protein; FUNCTIONS IN: molecular_function unknown; INVOLVED IN: biological_process unknown; LOCATED IN: cellular_component unknown; BEST Arabidopsis thaliana protein match is: unknown protein (TAIR:AT1G24147.1)		NO
AT1G24310	0.534768	3.69369	2.83366e-05	0.000507662	UP			unknown protein; FUNCTIONS IN: molecular_function unknown; INVOLVED IN: biological_process unknown; LOCATED IN: nucleolus; EXPRESSED IN: 20 plant structures; EXPRESSED DURING: 13 growth stages	Nucleoporin Nup54, alpha-helical domain | Nucleoporin Nup54/Nup57/Nup44	NO
AT1G24340	0.268405	5.2254	0.00578988	0.0393996	UP		FAD/NAD(P)-binding oxidoreductase family protein	EMBRYO DEFECTIVE 2421 (EMB2421); FUNCTIONS IN: monooxygenase activity; INVOLVED IN: embryo development ending in seed dormancy; EXPRESSED IN: 23 plant structures; EXPRESSED DURING: 14 growth stages; CONTAINS InterPro DOMAIN/s: Monooxygenase, FAD-binding (InterPro:IPR002938)		NO
AT1G24360	0.330809	6.73617	0.000330637	0.00393504	UP		NAD(P)-binding Rossmann-fold superfamily protein	NAD(P)-binding Rossmann-fold superfamily protein; FUNCTIONS IN: 3-oxoacyl-[acyl-carrier-protein] reductase activity, copper ion binding; INVOLVED IN: oxidation reduction, metabolic process, fatty acid biosynthetic process; LOCATED IN: chloroplast stroma, chloroplast, chloroplast envelope; EXPRESSED IN: 24 plant structures; EXPRESSED DURING: 14 growth stages; CONTAINS InterPro DOMAIN/s: 3-oxoacyl-…	3-oxoacyl-(acyl-carrier-protein) reductase | Glucose/ribitol dehydrogenase | NAD(P)-binding domain | Short-chain dehydrogenase/reductase SDR | Short-chain dehydrogenase/reductase, conserved site	NO
AT1G24510	0.385501	6.74522	2.12145e-05	0.000395869	UP		TCP-1/cpn60 chaperonin family protein	TCP-1/cpn60 chaperonin family protein; FUNCTIONS IN: protein binding; INVOLVED IN: protein folding, cellular protein metabolic process; LOCATED IN: plasma membrane; EXPRESSED IN: 23 plant structures; EXPRESSED DURING: 14 growth stages; CONTAINS InterPro DOMAIN/s: Chaperone, tailless complex polypeptide 1 (InterPro:IPR017998), Chaperonin Cpn60/TCP-1 (InterPro:IPR002423), T-complex protein 1, epsil…	Chaperone tailless complex polypeptide 1 (TCP-1) | Chaperonin Cpn60/TCP-1 | Chaperonin TCP-1, conserved site | GroEL-like apical domain | GroEL-like equatorial domain | T-complex protein 1, epsilon subunit | TCP-1-like chaperonin intermediate domain	NO
AT1G24610	0.379747	4.96428	0.000129186	0.00179132	UP		Rubisco methyltransferase family protein	Rubisco methyltransferase family protein; FUNCTIONS IN: molecular_function unknown; INVOLVED IN: biological_process unknown; LOCATED IN: chloroplast; EXPRESSED IN: 23 plant structures; EXPRESSED DURING: 15 growth stages; CONTAINS InterPro DOMAIN/s: SET domain (InterPro:IPR001214), Rubisco LSMT substrate-binding (InterPro:IPR015353); BEST Arabidopsis thaliana protein match is: plastid transcriptio…	Rubisco LSMT, substrate-binding domain | SET domain	NO
AT1G24706	0.398315	6.18295	2.49275e-05	0.000452362	UP	YES	THO2	THO2; FUNCTIONS IN: molecular_function unknown; INVOLVED IN: biological_process unknown; LOCATED IN: cellular_component unknown; EXPRESSED IN: 23 plant structures; EXPRESSED IN: 24 plant structures; EXPRESSED DURING: 13 growth stages; CONTAINS InterPro DOMAIN/s: THO complex, subunitTHOC2, C-region (InterPro:IPR021418), THO complex, subunitTHOC2, N-region (InterPro:IPR021726)	Signal transduction histidine kinase EnvZ-like, dimerisation/phosphoacceptor domain | THO complex, subunitTHOC2, C-terminal | THO complex, subunitTHOC2, N-terminal	NO
AT1G24764	0.399475	4.8669	0.000203286	0.00260681	UP		microtubule-associated proteins 70-2	microtubule-associated proteins 70-2 (MAP70-2); FUNCTIONS IN: microtubule binding; INVOLVED IN: cytoskeleton organization; LOCATED IN: microtubule; EXPRESSED IN: 23 plant structures; EXPRESSED DURING: 13 growth stages; CONTAINS InterPro DOMAIN/s: Myosin II heavy chain-like (InterPro:IPR009768); BEST Arabidopsis thaliana protein match is: microtubule-associated proteins 70-1 (TAIR:AT1G68060.1)		NO
AT1G24880	-0.602129	2.22502	0.00298584	0.0232899	DOWN		UDP-3-O-acyl N-acetylglycosamine deacetylase family protein	UDP-3-O-acyl N-acetylglycosamine deacetylase family protein; BEST Arabidopsis thaliana protein match is: UDP-3-O-acyl N-acetylglycosamine deacetylase family protein (TAIR:AT1G25054.1); FUNCTIONS IN: UDP-3-O-[3-hydroxymyristoyl] N-acetylglucosamine deacetylase activity; INVOLVED IN: lipid A biosynthetic process; CONTAINS InterPro DOMAIN/s: UDP-3-O-acyl N-acetylglucosamine deacetylase, N-terminal (…		NO
AT1G25055	3.95797	2.41385	0.00558657	0.0383482	UP		F-box family protein	F-box family protein; CONTAINS InterPro DOMAIN/s: F-box domain, cyclin-like (InterPro:IPR001810), F-box domain, Skp2-like (InterPro:IPR022364), F-box associated domain, type 1 (InterPro:IPR006527), F-box associated interaction domain (InterPro:IPR017451); BEST Arabidopsis thaliana protein match is: F-box family protein (TAIR:AT1G25150.1)	F-box associated domain, type 1 | F-box associated interaction domain | F-box domain | Galactose oxidase/kelch, beta-propeller	NO
AT1G25175	-0.706489	6.3034	5.87708e-06	0.000132975	DOWN		other RNA			NO
AT1G25230	0.895616	6.52034	2.08987e-15	4.16503e-13	UP		Calcineurin-like metallo-phosphoesterase superfamily protein	Calcineurin-like metallo-phosphoesterase superfamily protein; FUNCTIONS IN: hydrolase activity, protein serine/threonine phosphatase activity; INVOLVED IN: biological_process unknown; LOCATED IN: endomembrane system; EXPRESSED IN: 22 plant structures; EXPRESSED DURING: 13 growth stages; CONTAINS InterPro DOMAIN/s: Metallophosphoesterase (InterPro:IPR004843); BEST Arabidopsis thaliana protein matc…	Acid phosphatase, type 5 | Calcineurin-like phosphoesterase domain, apaH type | Metallo-dependent phosphatase-like	NO
AT1G25260	0.439836	5.27164	1.49e-05	0.000293649	UP		Ribosomal protein L10 family protein	Ribosomal protein L10 family protein; FUNCTIONS IN: structural constituent of ribosome; INVOLVED IN: translation, ribosome biogenesis; LOCATED IN: cytosolic ribosome, ribosome; EXPRESSED IN: 23 plant structures; EXPRESSED DURING: 13 growth stages; CONTAINS InterPro DOMAIN/s: Ribosomal protein L10 (InterPro:IPR001790); BEST Arabidopsis thaliana protein match is: Ribosomal protein L10 family protei…	Ribosomal protein L10/acidic P0	NO
AT1G25277	-1.05005	1.23182	1.85935e-06	5.02608e-05	DOWN					NO
AT1G25320	0.552117	2.74694	0.00150567	0.0134694	UP		Leucine-rich repeat protein kinase family protein	Leucine-rich repeat protein kinase family protein; FUNCTIONS IN: protein serine/threonine kinase activity, kinase activity, ATP binding; INVOLVED IN: transmembrane receptor protein tyrosine kinase signaling pathway, protein amino acid phosphorylation; LOCATED IN: plasma membrane; EXPRESSED IN: 20 plant structures; EXPRESSED DURING: 11 growth stages; CONTAINS InterPro DOMAIN/s: Protein kinase, cat…	Leucine-rich repeat | Leucine-rich repeat-containing N-terminal, type 2 | Protein kinase domain | Protein kinase-like domain	NO
AT1G25360	0.674806	0.640463	0.00420712	0.0305717	UP		Pentatricopeptide repeat (PPR) superfamily protein	Pentatricopeptide repeat (PPR) superfamily protein; FUNCTIONS IN: molecular_function unknown; INVOLVED IN: biological_process unknown; LOCATED IN: cellular_component unknown; EXPRESSED IN: 16 plant structures; EXPRESSED DURING: 9 growth stages; CONTAINS InterPro DOMAIN/s: Pentatricopeptide repeat (InterPro:IPR002885); BEST Arabidopsis thaliana protein match is: pentatricopeptide (PPR) repeat-cont…	Pentatricopeptide repeat | Tetratricopeptide-like helical domain	NO
AT1G25440	-0.381756	7.41088	0.0011132	0.0105616	DOWN		B-box type zinc finger protein with CCT domain	B-box type zinc finger protein with CCT domain; FUNCTIONS IN: sequence-specific DNA binding transcription factor activity, zinc ion binding; INVOLVED IN: regulation of transcription; LOCATED IN: membrane; EXPRESSED IN: leaf; CONTAINS InterPro DOMAIN/s: CCT domain (InterPro:IPR010402), Zinc finger, B-box (InterPro:IPR000315); BEST Arabidopsis thaliana protein match is: B-box type zinc finger prote…	CCT domain | Zinc finger, B-box	NO
AT1G25470	0.439543	3.63823	0.00124217	0.0115147	UP		AP2 domain-containing transcription factor family protein	AP2 domain-containing transcription factor family protein; FUNCTIONS IN: DNA binding, sequence-specific DNA binding transcription factor activity; INVOLVED IN: regulation of transcription, DNA-dependent; LOCATED IN: nucleus; CONTAINS InterPro DOMAIN/s: Pathogenesis-related genes transcriptional activator PTI6 (InterPro:IPR017392), DNA-binding, integrase-type (InterPro:IPR016177), Pathogenesis-rel…	AP2/ERF domain | DNA-binding domain | Pathogenesis-related genes transcriptional activator PTI6	NO
AT1G25480	0.545809	3.94702	0.000549419	0.00592918	UP		Aluminium activated malate transporter family protein	Aluminium activated malate transporter family protein; FUNCTIONS IN: molecular_function unknown; INVOLVED IN: response to aluminum ion; LOCATED IN: cellular_component unknown; CONTAINS InterPro DOMAIN/s: Malate transporter, aliminium toerance (InterPro:IPR020966); BEST Arabidopsis thaliana protein match is: Aluminium activated malate transporter family protein (TAIR:AT1G68600.1)	Aluminum-activated malate transporter	NO
AT1G25510	0.912634	1.66548	8.06695e-05	0.00121513	UP		Eukaryotic aspartyl protease family protein	Eukaryotic aspartyl protease family protein; FUNCTIONS IN: aspartic-type endopeptidase activity; INVOLVED IN: proteolysis; LOCATED IN: endomembrane system; EXPRESSED IN: 13 plant structures; EXPRESSED DURING: 6 growth stages; CONTAINS InterPro DOMAIN/s: Peptidase aspartic (InterPro:IPR021109), Peptidase aspartic, catalytic (InterPro:IPR009007), Peptidase A1 (InterPro:IPR001461); BEST Arabidopsis …	Aspartic peptidase | Aspartic peptidase domain	NO
AT1G25550	0.718381	7.31034	1.88499e-05	0.000359096	UP		myb-like transcription factor family protein	myb-like transcription factor family protein; CONTAINS InterPro DOMAIN/s: Homeodomain-like (InterPro:IPR009057), Myb, DNA-binding (InterPro:IPR014778), Myb-like DNA-binding domain, SHAQKYF class (InterPro:IPR006447), HTH transcriptional regulator, Myb-type, DNA-binding (InterPro:IPR017930), Homeodomain-related (InterPro:IPR012287); BEST Arabidopsis thaliana protein match is: myb-like transcriptio…	Homeodomain-like | Myb domain | Myb domain, plants | SANT/Myb domain	NO
AT1G25560	1.01763	7.69548	1.46036e-06	4.08865e-05	UP		AP2/B3 transcription factor family protein	TEMPRANILLO 1 (TEM1); FUNCTIONS IN: DNA binding, sequence-specific DNA binding transcription factor activity; INVOLVED IN: photoperiodism, flowering, ethylene mediated signaling pathway; LOCATED IN: chloroplast; EXPRESSED IN: 22 plant structures; EXPRESSED DURING: 13 growth stages; CONTAINS InterPro DOMAIN/s: DNA-binding, integrase-type (InterPro:IPR016177), Transcriptional factor B3 (InterPro:IP…	AP2/ERF domain | B3 DNA binding domain | DNA-binding domain | DNA-binding pseudobarrel domain	NO
AT1G26220	-0.345962	4.45413	0.00262253	0.0209909	DOWN		Acyl-CoA N-acyltransferases (NAT) superfamily protein	Acyl-CoA N-acyltransferases (NAT) superfamily protein; FUNCTIONS IN: N-acetyltransferase activity; INVOLVED IN: metabolic process; LOCATED IN: chloroplast; EXPRESSED IN: 18 plant structures; EXPRESSED DURING: 10 growth stages; CONTAINS InterPro DOMAIN/s: GCN5-related N-acetyltransferase, C-terminal (InterPro:IPR022610), GCN5-related N-acetyltransferase (InterPro:IPR000182), Acyl-CoA N-acyltransfe…	Acyl-CoA N-acyltransferase | GNAT domain	NO
AT1G26230	-0.753759	4.43161	3.94011e-11	3.58668e-09	DOWN		TCP-1/cpn60 chaperonin family protein	TCP-1/cpn60 chaperonin family protein; FUNCTIONS IN: ATP binding; INVOLVED IN: protein refolding, cellular protein metabolic process; EXPRESSED IN: 22 plant structures; LOCATED IN: chloroplast; EXPRESSED DURING: 13 growth stages; CONTAINS InterPro DOMAIN/s: Chaperonin Cpn60/TCP-1 (InterPro:IPR002423), Chaperonin Cpn60 (InterPro:IPR001844); BEST Arabidopsis thaliana protein match is: chaperonin 60…	Chaperonin Cpn60 | Chaperonin Cpn60/TCP-1 | GroEL-like apical domain | GroEL-like equatorial domain	NO
AT1G26260	-0.85814	2.20139	2.37591e-06	6.19373e-05	DOWN		cryptochrome-interacting basic-helix-loop-helix 5	cryptochrome-interacting basic-helix-loop-helix 5 (CIB5); FUNCTIONS IN: DNA binding, sequence-specific DNA binding transcription factor activity; INVOLVED IN: positive regulation of flower development, regulation of transcription; LOCATED IN: nucleus; EXPRESSED IN: 20 plant structures; EXPRESSED DURING: 13 growth stages; CONTAINS InterPro DOMAIN/s: Helix-loop-helix DNA-binding domain (InterPro:IP…	Myc-type, basic helix-loop-helix (bHLH) domain	NO
AT1G26330	0.874142	0.991591	0.000136793	0.00187747	UP		DNA binding	DNA binding; FUNCTIONS IN: DNA binding; INVOLVED IN: biological_process unknown; LOCATED IN: nucleus; EXPRESSED IN: 8 plant structures; EXPRESSED DURING: 4 anthesis, F mature embryo stage, petal differentiation and expansion stage, E expanded cotyledon stage, D bilateral stage; CONTAINS InterPro DOMAIN/s: WD40 repeat-like-containing domain (InterPro:IPR011046), FY-rich, C-terminal (InterPro:IPR00…	FY-rich, C-terminal | FY-rich, N-terminal | WD40 repeat | WD40-repeat-containing domain | WD40/YVTN repeat-like-containing domain	NO
AT1G26340	0.416112	3.15406	0.00336193	0.0256609	UP		cytochrome B5 isoform A	cytochrome B5 isoform A (CB5-A); CONTAINS InterPro DOMAIN/s: Cytochrome b5, heme-binding site (InterPro:IPR018506), Cytochrome b5 (InterPro:IPR001199); BEST Arabidopsis thaliana protein match is: cytochrome B5 isoform B (TAIR:AT2G32720.1)	Cytochrome b5, heme-binding site | Cytochrome b5-like heme/steroid binding domain	NO
AT1G26660	1.10125	3.00186	1.76206e-12	2.04648e-10	UP		Prefoldin chaperone subunit family protein	Prefoldin chaperone subunit family protein; FUNCTIONS IN: unfolded protein binding; INVOLVED IN: protein folding; LOCATED IN: prefoldin complex; EXPRESSED IN: 21 plant structures; EXPRESSED DURING: 9 growth stages; CONTAINS InterPro DOMAIN/s: Prefoldin alpha-like (InterPro:IPR004127), Prefoldin (InterPro:IPR009053)	Prefoldin | Prefoldin alpha-like	NO
AT1G26740	0.57207	3.24435	9.23452e-05	0.00136117	UP		Ribosomal L32p protein family	Ribosomal L32p protein family; FUNCTIONS IN: structural constituent of ribosome; INVOLVED IN: translation; LOCATED IN: large ribosomal subunit; EXPRESSED IN: 21 plant structures; EXPRESSED DURING: 13 growth stages; CONTAINS InterPro DOMAIN/s: Ribosomal protein L32p (InterPro:IPR002677); BEST Arabidopsis thaliana protein match is: Ribosomal L32p protein family (TAIR:AT1G69485.1)	Ribosomal protein L32p | Zinc-binding ribosomal protein	NO
AT1G26760	0.762567	0.234021	0.00665152	0.0439533	UP		SET domain protein 35	SET domain protein 35 (SDG35); FUNCTIONS IN: binding; INVOLVED IN: biological_process unknown; EXPRESSED IN: 21 plant structures; EXPRESSED DURING: 12 growth stages; CONTAINS InterPro DOMAIN/s: SET domain (InterPro:IPR001214), Tetratricopeptide-like helical (InterPro:IPR011990), Tetratricopeptide repeat-containing (InterPro:IPR013026), Tetratricopeptide repeat (InterPro:IPR019734); BEST Arabidops…	SET domain | Tetratricopeptide TPR1 | Tetratricopeptide repeat-containing domain | Tetratricopeptide-like helical domain	NO
AT1G26810	0.494836	2.81455	0.00264993	0.0211633	UP		galactosyltransferase1	galactosyltransferase1 (GALT1); CONTAINS InterPro DOMAIN/s: Galectin, carbohydrate recognition domain (InterPro:IPR001079), Glycosyl transferase, family 31 (InterPro:IPR002659), Concanavalin A-like lectin/glucanase, subgroup (InterPro:IPR013320), Concanavalin A-like lectin/glucanase (InterPro:IPR008985); BEST Arabidopsis thaliana protein match is: Galactosyltransferase family protein (TAIR:AT3G06…	Concanavalin A-like lectin/glucanase, subgroup | Concanavalin A-like lectin/glucanases superfamily | Galectin, carbohydrate recognition domain | Glycosyl transferase, family 31	NO
AT1G26840	0.724349	0.518572	0.00293445	0.0229743	UP		origin recognition complex protein 6	origin recognition complex protein 6 (ORC6); FUNCTIONS IN: DNA binding; INVOLVED IN: DNA replication; LOCATED IN: origin recognition complex; EXPRESSED IN: 17 plant structures; EXPRESSED DURING: 9 growth stages; CONTAINS InterPro DOMAIN/s: Origin recognition complex, subunit 6, metazoa/plant (InterPro:IPR020529), Origin recognition complex, subunit 6 (InterPro:IPR008721)	Origin recognition complex, subunit 6 | Origin recognition complex, subunit 6, metazoa/plant	NO
AT1G26880	0.376027	5.6287	6.31449e-05	0.000990123	UP		Ribosomal protein L34e superfamily protein	Ribosomal protein L34e superfamily protein; FUNCTIONS IN: structural constituent of ribosome; INVOLVED IN: translation, ribosome biogenesis; LOCATED IN: ribosome; LOCATED IN: ribosome, nucleolus, chloroplast; EXPRESSED IN: 25 plant structures; EXPRESSED DURING: 15 growth stages; CONTAINS InterPro DOMAIN/s: Ribosomal protein L34e, conserved site (InterPro:IPR018065), Ribosomal protein L34e (InterP…	Ribosomal protein L34Ae | Ribosomal protein L34e, conserved site	NO
AT1G26940	-0.497984	2.93705	0.0049315	0.0346632	DOWN		Cyclophilin-like peptidyl-prolyl cis-trans isomerase family protein	Cyclophilin-like peptidyl-prolyl cis-trans isomerase family protein; FUNCTIONS IN: peptidyl-prolyl cis-trans isomerase activity; INVOLVED IN: protein folding; LOCATED IN: endomembrane system; EXPRESSED IN: 23 plant structures; EXPRESSED DURING: 13 growth stages; CONTAINS InterPro DOMAIN/s: Cyclophilin-like (InterPro:IPR015891), Peptidyl-prolyl cis-trans isomerase, cyclophilin-type (InterPro:IPR00…	Cyclophilin-like domain | Cyclophilin-type peptidyl-prolyl cis-trans isomerase domain	NO
AT1G27060	0.562505	1.7329	0.00290341	0.0228054	UP		Regulator of chromosome condensation (RCC1) family protein	Regulator of chromosome condensation (RCC1) family protein; CONTAINS InterPro DOMAIN/s: Regulator of chromosome condensation/beta-lactamase-inhibitor protein II (InterPro:IPR009091), Regulator of chromosome condensation, RCC1 (InterPro:IPR000408); BEST Arabidopsis thaliana protein match is: Regulator of chromosome condensation (RCC1) family with FYVE zinc finger domain (TAIR:AT5G19420.1)	Regulator of chromosome condensation 1/beta-lactamase-inhibitor protein II | Regulator of chromosome condensation, RCC1	NO
AT1G27190	0.350154	5.66668	0.00020238	0.00260067	UP		Leucine-rich repeat protein kinase family protein	Leucine-rich repeat protein kinase family protein; FUNCTIONS IN: protein serine/threonine kinase activity, kinase activity, ATP binding; INVOLVED IN: transmembrane receptor protein tyrosine kinase signaling pathway, protein amino acid phosphorylation; LOCATED IN: nucleus, plasma membrane; EXPRESSED IN: 24 plant structures; EXPRESSED DURING: 13 growth stages; CONTAINS InterPro DOMAIN/s: Protein ki…	Leucine-rich repeat | Leucine-rich repeat-containing N-terminal, type 2 | Protein kinase domain | Protein kinase-like domain | Serine-threonine/tyrosine-protein kinase catalytic domain	NO
AT1G27210	0.392851	5.86123	0.000699668	0.00721541	UP		ARM repeat superfamily protein	ARM repeat superfamily protein; FUNCTIONS IN: binding; LOCATED IN: chloroplast; EXPRESSED IN: 23 plant structures; EXPRESSED DURING: 13 growth stages; CONTAINS InterPro DOMAIN/s: HEAT (InterPro:IPR000357), Armadillo-like helical (InterPro:IPR011989), HEAT, type 2 (InterPro:IPR021133), Armadillo-type fold (InterPro:IPR016024); BEST Arabidopsis thaliana protein match is: ARM repeat superfamily prot…	Armadillo-like helical | Armadillo-type fold | HEAT, type 2	NO
AT1G27285	0.68025	1.17571	0.00642379	0.042835	UP		transposable element gene	copia-like retrotransposon family, has a 0. P-value blast match to GB:AAC02666 polyprotein (Ty1_Copia-element) (Arabidopsis thaliana)		NO
AT1G27310	0.35626	5.83236	0.000711296	0.00731397	UP		nuclear transport factor 2A	nuclear transport factor 2A (NTF2A); CONTAINS InterPro DOMAIN/s: Nuclear transport factor 2 (InterPro:IPR002075), Nuclear transport factor 2, Eukaryote (InterPro:IPR018222); BEST Arabidopsis thaliana protein match is: nuclear transport factor 2B (TAIR:AT1G27970.1)	Nuclear transport factor 2 | Nuclear transport factor 2, eukaryote	NO
AT1G27370	-0.702724	4.24682	1.15028e-08	5.93301e-07	DOWN		squamosa promoter binding protein-like 10	squamosa promoter binding protein-like 10 (SPL10); FUNCTIONS IN: DNA binding, transcription activator activity, sequence-specific DNA binding transcription factor activity; INVOLVED IN: leaf shaping, regulation of transcription, regulation of timing of transition from vegetative to reproductive phase; LOCATED IN: nucleus; EXPRESSED IN: 24 plant structures; EXPRESSED DURING: 13 growth stages; CONT…	Transcription factor, SBP-box	NO
AT1G27390	0.309007	4.24558	0.00557053	0.0382744	UP		translocase outer membrane 20-2	translocase outer membrane 20-2 (TOM20-2); FUNCTIONS IN: P-P-bond-hydrolysis-driven protein transmembrane transporter activity, metal ion binding; INVOLVED IN: protein targeting to mitochondrion; LOCATED IN: in 6 components; EXPRESSED IN: 23 plant structures; EXPRESSED DURING: 13 growth stages; CONTAINS InterPro DOMAIN/s: Plant specific mitochondrial import receptor subunit TOM20 (InterPro:IPR010…	Plant specific mitochondrial import receptor subunit TOM20 | Tetratricopeptide-like helical domain	NO
AT1G27400	0.596873	6.4708	2.27108e-09	1.44053e-07	UP		Ribosomal protein L22p/L17e family protein	Ribosomal protein L22p/L17e family protein; FUNCTIONS IN: structural constituent of ribosome; INVOLVED IN: translation; LOCATED IN: ribosome, cytosolic large ribosomal subunit, plasma membrane, chloroplast, vacuole; EXPRESSED IN: 23 plant structures; EXPRESSED DURING: 13 growth stages; CONTAINS InterPro DOMAIN/s: Ribosomal protein L22/L17 (InterPro:IPR001063), Ribosomal protein L22/L17, eukaryoti…	Ribosomal protein L22/L17 | Ribosomal protein L22/L17, conserved site | Ribosomal protein L22/L17, eukaryotic/archaeal	NO
AT1G27410	0.656065	3.05391	7.122e-05	0.00109432	UP		DNA repair metallo-beta-lactamase family protein	DNA repair metallo-beta-lactamase family protein; CONTAINS InterPro DOMAIN/s: DNA repair metallo-beta-lactamase (InterPro:IPR011084); BEST Arabidopsis thaliana protein match is: sterile alpha motif (SAM) domain-containing protein (TAIR:AT2G45700.1)	Beta-lactamase-like | DNA repair metallo-beta-lactamase	NO
AT1G27420	0.895601	2.45771	5.72784e-06	0.000130263	UP		Galactose oxidase/kelch repeat superfamily protein	Galactose oxidase/kelch repeat superfamily protein; FUNCTIONS IN: molecular_function unknown; INVOLVED IN: biological_process unknown; LOCATED IN: chloroplast; CONTAINS InterPro DOMAIN/s: Kelch repeat type 1 (InterPro:IPR006652), Galactose oxidase/kelch, beta-propeller (InterPro:IPR011043), Kelch related (InterPro:IPR013089), Kelch-type beta propeller (InterPro:IPR015915); BEST Arabidopsis thalia…	F-box domain | Galactose oxidase, beta-propeller | Kelch repeat type 1	NO
AT1G27435	0.7275	4.01596	4.88903e-09	2.81483e-07	UP			unknown protein		NO
AT1G27450	0.447224	5.92101	1.92764e-05	0.000366314	UP		adenine phosphoribosyl transferase 1	adenine phosphoribosyl transferase 1 (APT1); CONTAINS InterPro DOMAIN/s: Adenine phosphoribosyl transferase (InterPro:IPR005764), Phosphoribosyltransferase (InterPro:IPR000836); FUNCTIONS IN: adenine phosphoribosyltransferase activity; BEST Arabidopsis thaliana protein match is: adenine phosphoribosyl transferase 3 (TAIR:AT4G22570.1); INVOLVED IN: response to cadmium ion, adenine salvage; LOCATED…	Adenine phosphoribosyl transferase | Phosphoribosyltransferase domain | Phosphoribosyltransferase-like	NO
AT1G27470	0.491024	3.94445	0.000362118	0.00423048	UP		transducin family protein / WD-40 repeat family protein	transducin family protein / WD-40 repeat family protein; CONTAINS InterPro DOMAIN/s: WD40 repeat-like-containing domain (InterPro:IPR011046), WD40 repeat 2 (InterPro:IPR019782), Cytochrome cd1-nitrite reductase-like, C-terminal haem d1 (InterPro:IPR011048), WD40-repeat-containing domain (InterPro:IPR017986), WD40 repeat (InterPro:IPR001680), WD40/YVTN repeat-like-containing domain (InterPro:IPR01…	WD40 repeat | WD40-repeat-containing domain | WD40/YVTN repeat-like-containing domain	NO
AT1G27480	-0.32266	5.41027	0.00127671	0.0117747	DOWN		alpha/beta-Hydrolases superfamily protein	alpha/beta-Hydrolases superfamily protein; FUNCTIONS IN: phosphatidylcholine-sterol O-acyltransferase activity; INVOLVED IN: lipid metabolic process; LOCATED IN: plasma membrane, vacuole; EXPRESSED IN: 21 plant structures; EXPRESSED DURING: 13 growth stages; CONTAINS InterPro DOMAIN/s: Lecithin:cholesterol acyltransferase (InterPro:IPR003386)	Alpha/Beta hydrolase fold | Lecithin:cholesterol/phospholipid:diacylglycerol acyltransferase	NO
AT1G27520	-0.596319	5.33953	1.28096e-08	6.54689e-07	DOWN		Glycosyl hydrolase family 47 protein	Glycosyl hydrolase family 47 protein; FUNCTIONS IN: mannosyl-oligosaccharide 1,2-alpha-mannosidase activity, alpha-mannosidase activity, calcium ion binding; INVOLVED IN: protein amino acid N-linked glycosylation; LOCATED IN: endomembrane system, membrane; EXPRESSED IN: 22 plant structures; EXPRESSED DURING: 13 growth stages; CONTAINS InterPro DOMAIN/s: Glycoside hydrolase, family 47 (InterPro:IP…	Glycoside hydrolase, family 47	NO
AT1G27540	0.312124	5.34201	0.00364696	0.0273632	UP		Protein of unknown function (DUF295)	Protein of unknown function (DUF295); FUNCTIONS IN: molecular_function unknown; INVOLVED IN: biological_process unknown; EXPRESSED IN: male gametophyte, pollen tube; EXPRESSED DURING: L mature pollen stage, M germinated pollen stage; CONTAINS InterPro DOMAIN/s: Protein of unknown function DUF295 (InterPro:IPR005174); BEST Arabidopsis thaliana protein match is: Protein of unknown function (DUF295)…	Protein of unknown function DUF295	NO
AT1G27565	2.83558	-2.47723	8.88262e-07	2.65462e-05	UP			unknown protein; FUNCTIONS IN: molecular_function unknown; INVOLVED IN: biological_process unknown; LOCATED IN: cellular_component unknown; BEST Arabidopsis thaliana protein match is: unknown protein (TAIR:AT1G52905.1)		YES	1:9574710:G-T;exonic_variant,1:9574676:T-A;exonic_variant
AT1G27590	-1.85886	2.56198	1.65816e-18	4.77337e-16	DOWN			CONTAINS InterPro DOMAIN/s: Protein of unknown function DUF3453 (InterPro:IPR021850); BEST Arabidopsis thaliana protein match is: phosphatidylinositol 3- and 4-kinase family protein (TAIR:AT1G27570.1)		NO
AT1G27595	0.587772	5.28288	8.00325e-09	4.3407e-07	UP			CONTAINS InterPro DOMAIN/s: Symplekin tight junction protein C-terminal (InterPro:IPR022075); BEST Arabidopsis thaliana protein match is: HEAT repeat-containing protein (TAIR:AT5G01400.1)	Armadillo-type fold | Symplekin C-terminal | Symplekin/Pta1	NO
AT1G27670	1.36814	2.4996	4.23021e-05	0.000716688	UP			unknown protein; BEST Arabidopsis thaliana protein match is: unknown protein (TAIR:AT1G75360.1)		NO
AT1G27680	0.469941	4.01532	5.76419e-05	0.000924054	UP		ADPGLC-PPase large subunit	ADPGLC-PPase large subunit (APL2); CONTAINS InterPro DOMAIN/s: Glucose-1-phosphate adenylyltransferase (InterPro:IPR011831), ADP-glucose pyrophosphorylase, conserved site (InterPro:IPR005836), Nucleotidyl transferase (InterPro:IPR005835); BEST Arabidopsis thaliana protein match is: Glucose-1-phosphate adenylyltransferase family protein (TAIR:AT4G39210.1)	ADP-glucose pyrophosphorylase, conserved site | Glucose-1-phosphate adenylyltransferase | Nucleotide-diphospho-sugar transferases | Nucleotidyl transferase | Trimeric LpxA-like	NO
AT1G27760	-0.384522	5.85967	0.000306991	0.00369146	DOWN		interferon-related developmental regulator family protein / IFRD protein family	SALT-TOLERANCE 32 (SAT32); FUNCTIONS IN: binding; INVOLVED IN: response to salt stress; LOCATED IN: nucleus, cytoplasm; EXPRESSED IN: 23 plant structures; EXPRESSED DURING: 14 growth stages; CONTAINS InterPro DOMAIN/s: Interferon-related developmental regulator, N-terminal (InterPro:IPR007701), Interferon-related developmental regulator, C-terminal (InterPro:IPR006921), Armadillo-type fold (Inter…	Armadillo-like helical | Armadillo-type fold | Interferon-related developmental regulator, C-terminal | Interferon-related developmental regulator, N-terminal	NO
AT1G27840	0.938166	4.59868	3.9445e-18	1.07141e-15	UP		Transducin/WD40 repeat-like superfamily protein	ATCSA-1; CONTAINS InterPro DOMAIN/s: WD40 repeat 2 (InterPro:IPR019782), WD40 repeat, conserved site (InterPro:IPR019775), WD40 repeat (InterPro:IPR001680), G-protein beta WD-40 repeat, region (InterPro:IPR020472), WD40 repeat-like-containing domain (InterPro:IPR011046), WD40-repeat-containing domain (InterPro:IPR017986), WD40/YVTN repeat-like-containing domain (InterPro:IPR015943), WD40 repeat, …	G-protein beta WD-40 repeat | WD40 repeat | WD40 repeat, conserved site | WD40-repeat-containing domain | WD40/YVTN repeat-like-containing domain	NO
AT1G27880	0.615257	1.10052	0.00613463	0.0412993	UP		DEAD/DEAH box RNA helicase family protein	DEAD/DEAH box RNA helicase family protein ; FUNCTIONS IN: helicase activity, nucleic acid binding, ATP-dependent helicase activity, ATP binding; INVOLVED IN: DNA recombination; LOCATED IN: cellular_component unknown; EXPRESSED IN: 18 plant structures; EXPRESSED DURING: 11 growth stages; CONTAINS InterPro DOMAIN/s: DNA/RNA helicase, DEAD/DEAH box type, N-terminal (InterPro:IPR011545), DNA helicase…	DEAD/DEAH box helicase domain | DNA helicase, ATP-dependent, RecQ type | DNA/RNA helicase, ATP-dependent, DEAH-box type, conserved site | Helicase, C-terminal | Helicase, superfamily 1/2, ATP-binding domain | P-loop containing nucleoside triphosphate hydrolase	NO
AT1G28010	0.736349	3.61729	0.000398717	0.00454919	UP		P-glycoprotein 14	P-glycoprotein 14 (PGP14); FUNCTIONS IN: ATPase activity, coupled to transmembrane movement of substances; INVOLVED IN: transport, transmembrane transport; LOCATED IN: integral to membrane; EXPRESSED IN: 9 plant structures; EXPRESSED DURING: LP.04 four leaves visible, LP.02 two leaves visible, LP.12 twelve leaves visible; CONTAINS InterPro DOMAIN/s: ATPase, AAA+ type, core (InterPro:IPR003593), A…	AAA+ ATPase domain | ABC transporter type 1, transmembrane domain | ABC transporter, conserved site | ABC transporter, transmembrane domain | ABC transporter-like | P-loop containing nucleoside triphosphate hydrolase	NO
AT1G28060	1.11618	5.45026	2.44051e-27	1.64397e-24	UP	YES	Pre-mRNA-splicing factor 3	Pre-mRNA-splicing factor 3; CONTAINS InterPro DOMAIN/s: Pre-mRNA-splicing factor 3 (InterPro:IPR013881); BEST Arabidopsis thaliana protein match is: Pre-mRNA-splicing factor 3 (TAIR:AT3G55930.1)	Domain of unknown function DUF1115 | Pre-mRNA-splicing factor 3 | U4/U6 small nuclear ribonucleoprotein Prp3	NO
AT1G28140	-0.301497	6.39296	0.00145774	0.0131208	DOWN			unknown protein; FUNCTIONS IN: molecular_function unknown; INVOLVED IN: biological_process unknown; LOCATED IN: chloroplast; EXPRESSED IN: 22 plant structures; EXPRESSED DURING: 13 growth stages; CONTAINS InterPro DOMAIN/s: Protein of unknown function DUF2301, transmembrane (InterPro:IPR019275)	Protein of unknown function DUF2301	NO
AT1G28210	0.864369	1.81443	1.05737e-05	0.000219835	UP		DNAJ heat shock family protein	ATJ1; FUNCTIONS IN: unfolded protein binding, heat shock protein binding, ATP binding; FUNCTIONS IN: unfolded protein binding, heat shock protein binding, zinc ion binding, nucleic acid binding; INVOLVED IN: protein folding; INVOLVED IN: protein folding, response to heat; LOCATED IN: mitochondrion; EXPRESSED IN: 22 plant structures; EXPRESSED DURING: 11 growth stages; CONTAINS InterPro DOMAIN/s: …		NO
AT1G28240	0.41227	5.43264	0.000156504	0.00210008	UP		Protein of unknown function (DUF616)	Protein of unknown function (DUF616); CONTAINS InterPro DOMAIN/s: Protein of unknown function DUF616 (InterPro:IPR006852); BEST Arabidopsis thaliana protein match is: Protein of unknown function (DUF616) (TAIR:AT1G53040.2)	Protein of unknown function DUF616	NO
AT1G28280	0.319096	5.04877	0.0059446	0.040229	UP		VQ motif-containing protein	VQ motif-containing protein; FUNCTIONS IN: molecular_function unknown; INVOLVED IN: biological_process unknown; EXPRESSED IN: 22 plant structures; EXPRESSED DURING: 13 growth stages; CONTAINS InterPro DOMAIN/s: VQ (InterPro:IPR008889); BEST Arabidopsis thaliana protein match is: VQ motif-containing protein (TAIR:AT2G33780.1)	VQ	NO
AT1G28350	0.390029	4.30207	0.00069168	0.00714691	UP		Nucleotidylyl transferase superfamily protein	Nucleotidylyl transferase superfamily protein; FUNCTIONS IN: tyrosine-tRNA ligase activity, nucleotide binding, aminoacyl-tRNA ligase activity, ATP binding; INVOLVED IN: translation, tyrosyl-tRNA aminoacylation, tRNA aminoacylation for protein translation; LOCATED IN: cytoplasm; CONTAINS InterPro DOMAIN/s: Rossmann-like alpha/beta/alpha sandwich fold (InterPro:IPR014729), Tyrosyl-tRNA synthetase,…	Aminoacyl-tRNA synthetase, class Ic | Rossmann-like alpha/beta/alpha sandwich fold	NO
AT1G28395	0.612816	2.22175	0.000798049	0.0080356	UP			unknown protein; FUNCTIONS IN: molecular_function unknown; INVOLVED IN: biological_process unknown; LOCATED IN: chloroplast; EXPRESSED IN: 22 plant structures; EXPRESSED DURING: 13 growth stages; BEST Arabidopsis thaliana protein match is: unknown protein (TAIR:AT2G33847.1); BEST Arabidopsis thaliana protein match is: unknown protein (TAIR:AT2G33847.2)		NO
AT1G28530	0.544291	2.81677	0.00158784	0.0140441	UP			unknown protein; INVOLVED IN: biological_process unknown; LOCATED IN: chloroplast; EXPRESSED IN: 19 plant structures; EXPRESSED DURING: 10 growth stages		NO
AT1G28570	-0.556215	3.40165	0.000424878	0.00479247	DOWN		SGNH hydrolase-type esterase superfamily protein	SGNH hydrolase-type esterase superfamily protein; FUNCTIONS IN: lipase activity, hydrolase activity, acting on ester bonds, carboxylesterase activity; INVOLVED IN: lipid metabolic process; LOCATED IN: endomembrane system; EXPRESSED IN: 22 plant structures; EXPRESSED DURING: 13 growth stages; CONTAINS InterPro DOMAIN/s: Lipase, GDSL (InterPro:IPR001087); CONTAINS InterPro DOMAIN/s: Lipase, GDSL (I…	Lipase, GDSL | SGNH hydrolase-type esterase domain	NO
AT1G28600	-1.18801	4.90935	2.60083e-06	6.70739e-05	DOWN		GDSL-like Lipase/Acylhydrolase superfamily protein	GDSL-like Lipase/Acylhydrolase superfamily protein; FUNCTIONS IN: hydrolase activity, acting on ester bonds, carboxylesterase activity; INVOLVED IN: lipid metabolic process; LOCATED IN: cell wall; EXPRESSED IN: 18 plant structures; EXPRESSED DURING: 9 growth stages; CONTAINS InterPro DOMAIN/s: Lipase, GDSL (InterPro:IPR001087); BEST Arabidopsis thaliana protein match is: GDSL-like Lipase/Acylhydr…	Lipase, GDSL | SGNH hydrolase-type esterase domain	NO
AT1G28610	-1.13859	3.87187	1.61167e-12	1.87829e-10	DOWN		GDSL-like Lipase/Acylhydrolase superfamily protein	GDSL-like Lipase/Acylhydrolase superfamily protein; FUNCTIONS IN: lipase activity, carboxylesterase activity; FUNCTIONS IN: lipase activity, hydrolase activity, acting on ester bonds, carboxylesterase activity; INVOLVED IN: lipid metabolic process; LOCATED IN: endomembrane system; EXPRESSED IN: 22 plant structures; BEST Arabidopsis thaliana protein match is: GDSL-like Lipase/Acylhydrolase superfa…	Lipase, GDSL | SGNH hydrolase-type esterase domain	NO
AT1G28620	-2.7688	0.736036	9.81234e-22	3.88811e-19	DOWN			pseudogene, lipase, similar to lipase Arab-1 GB:S68410 GI:2129636 (Arabidopsis thaliana); blastp match of 44% identity and 1.2e-48 P-value to GP|7523500|dbj|BAA94228.1||AP001633 unnamed protein product {Oryza sativa (japonica cultivar-group)}		NO
AT1G28660	-0.843503	4.7563	3.64503e-06	8.87054e-05	DOWN		GDSL-like Lipase/Acylhydrolase superfamily protein	GDSL-like Lipase/Acylhydrolase superfamily protein; FUNCTIONS IN: hydrolase activity, acting on ester bonds, carboxylesterase activity; INVOLVED IN: lipid metabolic process; LOCATED IN: endomembrane system; CONTAINS InterPro DOMAIN/s: Lipase, GDSL (InterPro:IPR001087); BEST Arabidopsis thaliana protein match is: GDSL-like Lipase/Acylhydrolase superfamily protein (TAIR:AT1G28670.1)	Lipase, GDSL | SGNH hydrolase-type esterase domain	NO
AT1G28670	-0.622688	5.36101	0.000192692	0.00249426	DOWN		GDSL-like Lipase/Acylhydrolase superfamily protein	ARAB-1; FUNCTIONS IN: hydrolase activity, acting on ester bonds, carboxylesterase activity; INVOLVED IN: glycerol biosynthetic process, lipid metabolic process; LOCATED IN: endomembrane system; CONTAINS InterPro DOMAIN/s: Lipase, GDSL (InterPro:IPR001087); BEST Arabidopsis thaliana protein match is: GDSL-like Lipase/Acylhydrolase superfamily protein (TAIR:AT1G28660.1)	Lipase, GDSL | SGNH hydrolase-type esterase domain	NO
AT1G28765	-2.29787	1.12178	4.25727e-12	4.55204e-10	DOWN					NO
AT1G29030	0.623793	3.41128	4.96721e-05	0.000818095	UP		Apoptosis inhibitory protein 5 (API5)	Apoptosis inhibitory protein 5 (API5); FUNCTIONS IN: binding; INVOLVED IN: biological_process unknown; LOCATED IN: cellular_component unknown; CONTAINS InterPro DOMAIN/s: Apoptosis inhibitory 5 (InterPro:IPR008383), Armadillo-type fold (InterPro:IPR016024); BEST Arabidopsis thaliana protein match is: Apoptosis inhibitory protein 5 (API5) (TAIR:AT2G34040.1)	Apoptosis inhibitory 5 | Armadillo-like helical | Armadillo-type fold	NO
AT1G29250	0.596289	4.17175	3.11883e-06	7.79268e-05	UP		Alba DNA/RNA-binding protein	Alba DNA/RNA-binding protein; FUNCTIONS IN: nucleic acid binding; INVOLVED IN: biological_process unknown; LOCATED IN: plasma membrane, nucleus; EXPRESSED IN: 23 plant structures; EXPRESSED DURING: 14 growth stages; CONTAINS InterPro DOMAIN/s: Alba, DNA/RNA-binding protein (InterPro:IPR002775), Uncharacterised conserved protein UCP030333, DNA/RNA-binding Alba-related (InterPro:IPR014560); BEST Ar…	DNA/RNA-binding protein Alba-like | Uncharacterised conserved protein UCP030333, DNA/RNA-binding Alba-related	NO
AT1G29260	0.357466	5.04529	0.00105062	0.0100471	UP		peroxin 7	peroxin 7 (PEX7); CONTAINS InterPro DOMAIN/s: WD40 repeat 2 (InterPro:IPR019782), WD40 repeat, conserved site (InterPro:IPR019775), WD40 repeat (InterPro:IPR001680), G-protein beta WD-40 repeat, region (InterPro:IPR020472), WD40 repeat-like-containing domain (InterPro:IPR011046), WD40-repeat-containing domain (InterPro:IPR017986), WD40/YVTN repeat-like-containing domain (InterPro:IPR015943), WD40…	G-protein beta WD-40 repeat | WD40 repeat | WD40 repeat, conserved site | WD40-repeat-containing domain | WD40/YVTN repeat-like-containing domain	NO
AT1G29310	0.540208	4.50716	4.45308e-06	0.000104884	UP		SecY protein transport family protein	SecY protein transport family protein; FUNCTIONS IN: P-P-bond-hydrolysis-driven protein transmembrane transporter activity; INVOLVED IN: protein secretion, protein transport; LOCATED IN: mitochondrion, plasma membrane, membrane; EXPRESSED IN: 24 plant structures; EXPRESSED DURING: 15 growth stages; CONTAINS InterPro DOMAIN/s: SecY protein (InterPro:IPR002208), Translocon Sec61/SecY, plug domain (…	SecY subunit domain | SecY/SEC61-alpha family | Translocon Sec61/SecY, plug domain	YES	1:10253007:TA-T;splice_donor_region_variant&splice_donor_variant,1:10253013:G-GT;splice_donor_region_variant
AT1G29320	0.675612	2.8326	7.65064e-05	0.00116335	UP		Transducin/WD40 repeat-like superfamily protein	Transducin/WD40 repeat-like superfamily protein; CONTAINS InterPro DOMAIN/s: WD40 repeat-like-containing domain (InterPro:IPR011046), WD40-repeat-containing domain (InterPro:IPR017986), WD40 repeat (InterPro:IPR001680), WD40/YVTN repeat-like-containing domain (InterPro:IPR015943), WD40 repeat, subgroup (InterPro:IPR019781)	WD40 repeat | WD40-repeat-containing domain | WD40/YVTN repeat-like-containing domain	NO
AT1G29350	0.344975	6.13199	0.000501867	0.00550778	UP		Kinase-related protein of unknown function (DUF1296)	Kinase-related protein of unknown function (DUF1296); CONTAINS InterPro DOMAIN/s: Protein of unknown function DUF1296 (InterPro:IPR009719); BEST Arabidopsis thaliana protein match is: Kinase-related protein of unknown function (DUF1296) (TAIR:AT1G29370.1)	Protein of unknown function DUF1296, plant | UBA-like	YES	1:10272949:C-A;intronic_variant
AT1G29357	-0.353913	4.4341	0.00417975	0.0304335	DOWN		other RNA			NO
AT1G29370	0.422984	6.23524	3.47564e-05	0.000605603	UP		Kinase-related protein of unknown function (DUF1296)	Kinase-related protein of unknown function (DUF1296); CONTAINS InterPro DOMAIN/s: Protein of unknown function DUF1296 (InterPro:IPR009719); BEST Arabidopsis thaliana protein match is: Kinase-related protein of unknown function (DUF1296) (TAIR:AT1G29350.1)	Protein of unknown function DUF1296, plant | UBA-like	NO
AT1G29430	-1.01103	2.91704	0.0016936	0.0147625	DOWN		SAUR-like auxin-responsive protein family	SAUR-like auxin-responsive protein family ; CONTAINS InterPro DOMAIN/s: Auxin responsive SAUR protein (InterPro:IPR003676); BEST Arabidopsis thaliana protein match is: SAUR-like auxin-responsive protein family (TAIR:AT5G27780.1)	Auxin-induced protein, ARG7	NO
AT1G29440	-0.93745	3.60472	2.25669e-05	0.000416479	DOWN		SAUR-like auxin-responsive protein family	SAUR-like auxin-responsive protein family ; CONTAINS InterPro DOMAIN/s: Auxin responsive SAUR protein (InterPro:IPR003676); BEST Arabidopsis thaliana protein match is: SAUR-like auxin-responsive protein family (TAIR:AT1G29430.1)		NO
AT1G29460	-0.881295	3.17766	1.68898e-05	0.000326933	DOWN		SAUR-like auxin-responsive protein family	SAUR-like auxin-responsive protein family ; FUNCTIONS IN: molecular_function unknown; INVOLVED IN: response to auxin stimulus; LOCATED IN: mitochondrion; EXPRESSED IN: 12 plant structures; EXPRESSED DURING: 9 growth stages; CONTAINS InterPro DOMAIN/s: Auxin responsive SAUR protein (InterPro:IPR003676); BEST Arabidopsis thaliana protein match is: SAUR-like auxin-responsive protein family (TAIR:AT1…		NO
AT1G29550	0.641368	3.34532	1.28754e-05	0.000260298	UP		Eukaryotic initiation factor 4E protein	Eukaryotic initiation factor 4E protein; FUNCTIONS IN: RNA binding, translation initiation factor activity; INVOLVED IN: translational initiation; LOCATED IN: cytoplasm; EXPRESSED IN: male gametophyte, pollen tube; EXPRESSED DURING: L mature pollen stage, M germinated pollen stage; CONTAINS InterPro DOMAIN/s: Eukaryotic translation initiation factor 4E (eIF-4E) (InterPro:IPR001040), Eukaryotic tr…	Eukaryotic translation initiation factor 4E (eIF-4E), conserved site | Translation Initiation factor eIF- 4e | Translation Initiation factor eIF- 4e-like domain	NO
AT1G29560	2.03992	3.59509	1.59343e-38	2.33341e-35	UP		Zinc finger C-x8-C-x5-C-x3-H type family protein	Zinc finger C-x8-C-x5-C-x3-H type family protein; FUNCTIONS IN: zinc ion binding, nucleic acid binding; LOCATED IN: cellular_component unknown; CONTAINS InterPro DOMAIN/s: Zinc finger, CCCH-type (InterPro:IPR000571); BEST Arabidopsis thaliana protein match is: Zinc finger C-x8-C-x5-C-x3-H type family protein (TAIR:AT1G29570.1)	Zinc finger, CCCH-type	NO
AT1G29700	-0.327527	6.35071	0.00160804	0.0141818	DOWN		Metallo-hydrolase/oxidoreductase superfamily protein	Metallo-hydrolase/oxidoreductase superfamily protein; FUNCTIONS IN: molecular_function unknown; INVOLVED IN: biological_process unknown; LOCATED IN: chloroplast; EXPRESSED IN: 22 plant structures; EXPRESSED DURING: 13 growth stages	Beta-lactamase-like	NO
AT1G29720	-1.54672	3.19714	3.19171e-06	7.93944e-05	DOWN		Leucine-rich repeat transmembrane protein kinase	Leucine-rich repeat transmembrane protein kinase; FUNCTIONS IN: protein serine/threonine kinase activity, protein kinase activity, kinase activity, ATP binding; INVOLVED IN: protein amino acid phosphorylation; LOCATED IN: endomembrane system; EXPRESSED IN: 15 plant structures; EXPRESSED DURING: 9 growth stages; CONTAINS InterPro DOMAIN/s: Protein kinase, ATP binding site (InterPro:IPR017441), Ser…	Concanavalin A-like lectin/glucanase, subgroup | Malectin | Protein kinase domain | Protein kinase, ATP binding site | Protein kinase-like domain | Serine-threonine/tyrosine-protein kinase catalytic domain | Serine/threonine-protein kinase, active site	NO
AT1G29730	-0.724091	1.09811	0.000630279	0.00663389	DOWN		Leucine-rich repeat transmembrane protein kinase	Leucine-rich repeat transmembrane protein kinase; FUNCTIONS IN: protein serine/threonine kinase activity, protein kinase activity, kinase activity, ATP binding; INVOLVED IN: protein amino acid phosphorylation; LOCATED IN: endomembrane system; CONTAINS InterPro DOMAIN/s: Protein kinase, ATP binding site (InterPro:IPR017441), Serine/threonine-protein kinase domain (InterPro:IPR002290), Leucine-rich…	Concanavalin A-like lectin/glucanase, subgroup | Leucine-rich repeat | Malectin | Protein kinase domain | Protein kinase, ATP binding site | Protein kinase-like domain | Serine/threonine-protein kinase, active site	NO
AT1G29820	0.44006	3.55729	0.00357998	0.0269808	UP		Magnesium transporter CorA-like family protein	Magnesium transporter CorA-like family protein; FUNCTIONS IN: metal ion transmembrane transporter activity; INVOLVED IN: metal ion transport, transmembrane transport; INVOLVED IN: transmembrane transport, metal ion transport; LOCATED IN: membrane; EXPRESSED IN: 21 plant structures; EXPRESSED DURING: 13 growth stages; CONTAINS InterPro DOMAIN/s: Mg2+ transporter protein, CorA-like (InterPro:IPR002…	Mg2+ transporter protein, CorA-like/Zinc transport protein ZntB	YES	1:10438732:T-A;protein_coding;missense;TCT>ACT;S>T
AT1G29900	0.641477	6.6841	9.52244e-12	9.63139e-10	UP		carbamoyl phosphate synthetase B	carbamoyl phosphate synthetase B (CARB); FUNCTIONS IN: catalytic activity, ATP binding; INVOLVED IN: cellular response to phosphate starvation, arginine biosynthetic process; LOCATED IN: chloroplast stroma, chloroplast, membrane; EXPRESSED IN: 24 plant structures; EXPRESSED DURING: 13 growth stages; CONTAINS InterPro DOMAIN/s: Carbamoyl phosphate synthase, large subunit, N-terminal (InterPro:IPR0…	ATP-grasp fold | ATP-grasp fold, subdomain 1 | ATP-grasp fold, subdomain 2 | Carbamoyl-phosphate synthase large subunit, CPSase domain | Carbamoyl-phosphate synthase, large subunit | Carbamoyl-phosphate synthase, large subunit, N-terminal | Carbamoyl-phosphate synthetase large subunit-like, ATP-binding domain | Carbamoyl-phosphate synthetase, large subunit oligomerisation domain | Methylglyoxal s…	NO
AT1G29940	0.607507	4.51605	1.62869e-06	4.50007e-05	UP		nuclear RNA polymerase A2	nuclear RNA polymerase A2 (NRPA2); FUNCTIONS IN: DNA-directed RNA polymerase activity, ribonucleoside binding, DNA binding; INVOLVED IN: transcription; LOCATED IN: nucleus; EXPRESSED IN: 22 plant structures; EXPRESSED DURING: 13 growth stages; CONTAINS InterPro DOMAIN/s: DNA-directed RNA polymerase, subunit 2, domain 6 (InterPro:IPR007120), RNA polymerase Rpb2, domain 7 (InterPro:IPR007641), RNA …	DNA-directed RNA polymerase, subunit 2 | DNA-directed RNA polymerase, subunit 2, domain 6 | RNA polymerase I, Rpa2 specific | RNA polymerase Rpb2, domain 2 | RNA polymerase Rpb2, domain 3 | RNA polymerase Rpb2, domain 7 | RNA polymerase, beta subunit, conserved site | RNA polymerase, beta subunit, protrusion	NO
AT1G29950	-0.318609	5.31517	0.00532274	0.0368424	DOWN		basic helix-loop-helix (bHLH) DNA-binding superfamily protein	basic helix-loop-helix (bHLH) DNA-binding superfamily protein; FUNCTIONS IN: transcription regulator activity, sequence-specific DNA binding transcription factor activity; INVOLVED IN: regulation of transcription; LOCATED IN: nucleus; CONTAINS InterPro DOMAIN/s: Helix-loop-helix DNA-binding domain (InterPro:IPR001092), Helix-loop-helix DNA-binding (InterPro:IPR011598); BEST Arabidopsis thaliana p…	Myc-type, basic helix-loop-helix (bHLH) domain	NO
AT1G29951	-2.83613	-0.666193	0.0051826	0.036095	DOWN		conserved peptide upstream open reading frame 35	conserved peptide upstream open reading frame 35 (CPuORF35)	Myc-type, basic helix-loop-helix (bHLH) domain	NO
AT1G29980	0.679996	2.12388	0.000468748	0.00519762	UP		Protein of unknown function, DUF642	INVOLVED IN: biological_process unknown; LOCATED IN: plasma membrane, anchored to membrane; EXPRESSED IN: 24 plant structures; EXPRESSED DURING: 13 growth stages; CONTAINS InterPro DOMAIN/s: Protein of unknown function DUF642 (InterPro:IPR006946), Galactose-binding domain-like (InterPro:IPR008979); BEST Arabidopsis thaliana protein match is: Protein of unknown function, DUF642 (TAIR:AT2G34510.1)	Galactose-binding domain-like | Protein of unknown function DUF642	NO
AT1G29990	0.299602	4.66641	0.00406863	0.0297791	UP		prefoldin 6	prefoldin 6 (PFD6); FUNCTIONS IN: unfolded protein binding; INVOLVED IN: protein folding, cortical microtubule organization; LOCATED IN: prefoldin complex, cytoplasm; EXPRESSED IN: 23 plant structures; EXPRESSED DURING: 13 growth stages; CONTAINS InterPro DOMAIN/s: Prefoldin beta-like (InterPro:IPR002777), Prefoldin (InterPro:IPR009053)	Prefoldin | Prefoldin beta-like	NO
AT1G30240	0.840643	2.78502	2.98949e-06	7.55357e-05	UP			FUNCTIONS IN: binding; unknown protein; INVOLVED IN: biological_process unknown; LOCATED IN: cellular_component unknown; EXPRESSED IN: 21 plant structures; EXPRESSED DURING: 13 growth stages; CONTAINS InterPro DOMAIN/s: Armadillo-type fold (InterPro:IPR016024)	Armadillo-type fold	NO
AT1G30330	0.435093	5.65783	9.55086e-05	0.00139984	UP		auxin response factor 6	auxin response factor 6 (ARF6); FUNCTIONS IN: sequence-specific DNA binding transcription factor activity; INVOLVED IN: flower development, response to auxin stimulus, regulation of transcription, DNA-dependent; LOCATED IN: nucleus; EXPRESSED IN: 28 plant structures; EXPRESSED DURING: 13 growth stages; CONTAINS InterPro DOMAIN/s: Aux/IAA-ARF-dimerisation (InterPro:IPR011525), Transcriptional fact…	AUX/IAA protein | Aux/IAA-ARF-dimerisation | Auxin response factor | B3 DNA binding domain | DNA-binding pseudobarrel domain	NO
AT1G30360	0.426551	8.2284	3.86256e-06	9.27262e-05	UP		Early-responsive to dehydration stress protein (ERD4)	early-responsive to dehydration 4 (ERD4); INVOLVED IN: response to water deprivation; LOCATED IN: plasma membrane, chloroplast, vacuole, membrane, chloroplast envelope; EXPRESSED IN: 26 plant structures; EXPRESSED DURING: 14 growth stages; CONTAINS InterPro DOMAIN/s: Protein of unknown function DUF221 (InterPro:IPR003864); BEST Arabidopsis thaliana protein match is: ERD (early-responsive to dehyd…	Domain of unknown function DUF221 | Domain of unknown function DUF4463	NO
AT1G30380	-0.299299	10.4568	0.00253829	0.0204478	DOWN		photosystem I subunit K	photosystem I subunit K (PSAK); FUNCTIONS IN: molecular_function unknown; INVOLVED IN: photosynthesis; LOCATED IN: thylakoid, chloroplast thylakoid membrane, photosystem I, chloroplast, membrane; EXPRESSED IN: 23 plant structures; EXPRESSED DURING: 13 growth stages; CONTAINS InterPro DOMAIN/s: Photosystem I PsaG/PsaK protein (InterPro:IPR000549), Photosystem I reaction centre, PsaK, plant (InterP…	Photosystem I PsaG/PsaK domain | Photosystem I PsaG/PsaK protein | Photosystem I PsaG/PsaK, plant | Photosystem I PsaK, reaction centre, plant	NO
AT1G30420	-0.895387	1.92003	0.000597737	0.00635693	DOWN		multidrug resistance-associated protein 12	multidrug resistance-associated protein 12 (MRP12); FUNCTIONS IN: ATPase activity, coupled to transmembrane movement of substances; INVOLVED IN: transport, transmembrane transport; LOCATED IN: integral to membrane; CONTAINS InterPro DOMAIN/s: ATPase, AAA+ type, core (InterPro:IPR003593), ABC transporter-like (InterPro:IPR003439), ABC transporter, transmembrane domain, type 1 (InterPro:IPR011527),…	AAA+ ATPase domain | ABC transporter type 1, transmembrane domain | ABC transporter, conserved site | ABC transporter, transmembrane domain | ABC transporter-like | P-loop containing nucleoside triphosphate hydrolase	NO
AT1G30755	-0.839017	2.72814	1.19577e-08	6.13945e-07	DOWN		Protein of unknown function (DUF668)	Protein of unknown function (DUF668); CONTAINS InterPro DOMAIN/s: Protein of unknown function DUF668 (InterPro:IPR007700), Protein of unknown function DUF3475 (InterPro:IPR021864); BEST Arabidopsis thaliana protein match is: Protein of unknown function (DUF668) (TAIR:AT1G34320.1)	Protein of unknown function DUF3475 | Protein of unknown function DUF668	NO
AT1G30820	0.844937	5.29544	9.85505e-16	2.0876e-13	UP		CTP synthase family protein	CTP synthase family protein; FUNCTIONS IN: CTP synthase activity, catalytic activity; INVOLVED IN: pyrimidine ribonucleotide metabolic process, pyrimidine nucleotide biosynthetic process; EXPRESSED IN: 21 plant structures; EXPRESSED DURING: 13 growth stages; CONTAINS InterPro DOMAIN/s: Glutamine amidotransferase class-I, C-terminal (InterPro:IPR000991), CTP synthase (InterPro:IPR004468), CTP synt…	CTP synthase | CTP synthase, N-terminal | Class I glutamine amidotransferase-like | Glutamine amidotransferase | P-loop containing nucleoside triphosphate hydrolase	NO
AT1G30850	-1.03096	-0.584585	0.00666141	0.0440014	DOWN		root hair specific 4	root hair specific 4 (RSH4); BEST Arabidopsis thaliana protein match is: unknown protein (TAIR:AT2G34910.1)		NO
AT1G30860	-0.93654	-0.00178884	0.00456241	0.0325795	DOWN		RING/U-box superfamily protein	RING/U-box superfamily protein; FUNCTIONS IN: zinc ion binding; EXPRESSED IN: stem, stamen, pollen tube; EXPRESSED DURING: 4 anthesis; CONTAINS InterPro DOMAIN/s: Zinc finger, RING-type (InterPro:IPR001841); BEST Arabidopsis thaliana protein match is: RING/U-box superfamily protein (TAIR:AT2G34920.1)	Zinc finger, RING-type | Zinc finger, RING/FYVE/PHD-type	NO
AT1G30870	-0.707366	3.3088	0.00774809	0.0496506	DOWN		Peroxidase superfamily protein	Peroxidase superfamily protein; FUNCTIONS IN: peroxidase activity, heme binding; INVOLVED IN: oxidation reduction, response to oxidative stress; LOCATED IN: endomembrane system; EXPRESSED IN: root; CONTAINS InterPro DOMAIN/s: Haem peroxidase (InterPro:IPR010255), Plant peroxidase (InterPro:IPR000823), Peroxidases heam-ligand binding site (InterPro:IPR019793), Haem peroxidase, plant/fungal/bacteri…	Haem peroxidase | Haem peroxidase, plant/fungal/bacterial | Peroxidase, active site | Peroxidases heam-ligand binding site | Plant peroxidase	NO
AT1G30910	-0.372694	4.73334	0.000372341	0.00432293	DOWN		Molybdenum cofactor sulfurase family protein	Molybdenum cofactor sulfurase family protein; FUNCTIONS IN: molybdenum ion binding, Mo-molybdopterin cofactor sulfurase activity, pyridoxal phosphate binding, catalytic activity; INVOLVED IN: biological_process unknown; LOCATED IN: chloroplast; EXPRESSED IN: 22 plant structures; EXPRESSED DURING: 13 growth stages; CONTAINS InterPro DOMAIN/s: Pyruvate kinase, beta-barrel-like (InterPro:IPR011037),…	MOSC, N-terminal beta barrel | Molybdenum cofactor sulfurase, C-terminal | Pyruvate kinase-like, insert domain	NO
AT1G30960	0.759028	0.984647	0.000384012	0.00442942	UP		GTP-binding family protein	GTP-binding family protein; FUNCTIONS IN: RNA binding, GTP binding; LOCATED IN: cytosol; EXPRESSED IN: 20 plant structures; EXPRESSED DURING: 9 growth stages; CONTAINS InterPro DOMAIN/s: K Homology, prokaryotic type (InterPro:IPR009019), K Homology, type 2 (InterPro:IPR004044), Small GTP-binding protein (InterPro:IPR005225), GTP-binding protein Era (InterPro:IPR005662), GTP-binding protein, HSR1-…	GTP binding domain | GTP-binding protein Era | K Homology domain, type 2 | K homology domain, prokaryotic type | K homology domain-like, alpha/beta | P-loop containing nucleoside triphosphate hydrolase | Small GTP-binding protein domain	NO
AT1G30970	-0.567048	5.2577	1.94459e-07	7.19732e-06	DOWN	YES	zinc finger (C2H2 type) family protein	suppressor of FRIGIDA4 (SUF4); CONTAINS InterPro DOMAIN/s: Zinc finger, C2H2-like (InterPro:IPR015880), Zinc finger, BED-type predicted (InterPro:IPR003656), Zinc finger, C2H2-type (InterPro:IPR007087); FUNCTIONS IN: DNA binding, protein homodimerization activity, protein heterodimerization activity, sequence-specific DNA binding transcription factor activity; INVOLVED IN: histone H3-K4 methylati…	Zinc finger, BED-type | Zinc finger, C2H2 | Zinc finger, C2H2-like	NO
AT1G31040	1.35459	1.93421	1.79591e-07	6.71343e-06	UP		PLATZ transcription factor family protein	PLATZ transcription factor family protein; CONTAINS InterPro DOMAIN/s: Protein of unknown function DUF597 (InterPro:IPR006734); BEST Arabidopsis thaliana protein match is: PLATZ transcription factor family protein (TAIR:AT2G12646.1)	Protein of unknown function DUF597	NO
AT1G31170	-0.456494	5.34694	3.1577e-06	7.8781e-05	DOWN		sulfiredoxin	sulfiredoxin (SRX); CONTAINS InterPro DOMAIN/s: ParB-like nuclease (InterPro:IPR003115); CONTAINS InterPro DOMAIN/s: Sulfiredoxin (InterPro:IPR016692), ParB-like nuclease (InterPro:IPR003115)	ParB/Sulfiredoxin | Sulfiredoxin	NO
AT1G31173	-1.66881	3.93731	4.59661e-15	8.60102e-13	DOWN		MIR167D; miRNA			NO
AT1G31180	0.361447	5.88127	0.000159091	0.00212801	UP		isopropylmalate dehydrogenase 3	isopropylmalate dehydrogenase 3 (IMD3); FUNCTIONS IN: 3-isopropylmalate dehydrogenase activity; INVOLVED IN: leucine biosynthetic process, response to salt stress, metabolic process; LOCATED IN: thylakoid, chloroplast, chloroplast stroma, plastid; EXPRESSED IN: fruit, root, leaf; EXPRESSED DURING: seed development stages; CONTAINS InterPro DOMAIN/s: Isopropylmalate dehydrogenase (InterPro:IPR0044…	Isocitrate and isopropylmalate dehydrogenases family | Isocitrate/isopropylmalate dehydrogenase, conserved site | Isopropylmalate dehydrogenase | Isopropylmalate dehydrogenase-like domain	NO
AT1G31240	0.990583	0.513716	8.09077e-05	0.00121763	UP		Bromodomain transcription factor	Bromodomain transcription factor; FUNCTIONS IN: DNA binding; INVOLVED IN: biological_process unknown; LOCATED IN: cellular_component unknown; EXPRESSED IN: 12 plant structures; EXPRESSED DURING: 6 growth stages; CONTAINS InterPro DOMAIN/s: Histone-fold (InterPro:IPR009072), Bromodomain transcription factor (InterPro:IPR006565); BEST Arabidopsis thaliana protein match is: Bromodomain transcription…	Bromodomain transcription factor | Histone-fold	NO
AT1G31290	0.625824	4.31815	2.1798e-05	0.000404284	UP		ARGONAUTE 3	ARGONAUTE 3 (AGO3); FUNCTIONS IN: nucleic acid binding; INVOLVED IN: biological_process unknown; LOCATED IN: cellular_component unknown; EXPRESSED IN: 11 plant structures; EXPRESSED DURING: LP.06 six leaves visible, LP.04 four leaves visible, 4 anthesis, C globular stage, petal differentiation and expansion stage; CONTAINS InterPro DOMAIN/s: Domain of unknown function DUF1785 (InterPro:IPR014811)…	Domain of unknown function DUF1785 | PAZ domain | Ribonuclease H-like domain | Stem cell self-renewal protein Piwi	NO
AT1G31310	0.953372	1.42286	0.00039226	0.00449378	UP		hydroxyproline-rich glycoprotein family protein	hydroxyproline-rich glycoprotein family protein; CONTAINS InterPro DOMAIN/s: MYB-like (InterPro:IPR017877); BEST Arabidopsis thaliana protein match is: Homeodomain-like superfamily protein (TAIR:AT2G35640.1)	Myb-like domain	NO
AT1G31330	-0.314261	11.4393	0.00387012	0.028686	DOWN		photosystem I subunit F	photosystem I subunit F (PSAF); FUNCTIONS IN: molecular_function unknown; INVOLVED IN: photosynthesis; LOCATED IN: in 7 components; EXPRESSED IN: 25 plant structures; EXPRESSED DURING: 14 growth stages; CONTAINS InterPro DOMAIN/s: Photosystem I reaction centre protein PsaF, subunit III (InterPro:IPR003666)	Photosystem I PsaF, reaction centre subunit III	NO
AT1G31340	0.303391	5.2621	0.00228934	0.0188388	UP		related to ubiquitin 1	related to ubiquitin 1 (RUB1); INVOLVED IN: protein modification process, response to auxin stimulus, protein neddylation, ethylene biosynthetic process, embryo development; LOCATED IN: plasma membrane; EXPRESSED IN: 6 plant structures; EXPRESSED DURING: L mature pollen stage, M germinated pollen stage; CONTAINS InterPro DOMAIN/s: Ubiquitin subgroup (InterPro:IPR019956), Ubiquitin conserved site …	Ubiquitin | Ubiquitin conserved site | Ubiquitin-like | Ubiquitin-related domain	NO
AT1G31570	-3.26231	-1.87836	1.08282e-05	0.000224019	DOWN		transposable element gene	CACTA-like transposase family (Tnp2/En/Spm), has a 0. P-value blast match to gb|AAG52024.1|AC022456_5 Tam1-homologous transposon protein TNP2, putative; 12762-16371 (Arabidopsis thaliana) (CACTA-element)		NO
AT1G31580	-1.17373	7.23734	1.42121e-08	7.19815e-07	DOWN		ECS1	ECS1		NO
AT1G31660	0.834049	3.84287	1.73114e-09	1.1388e-07	UP			CONTAINS InterPro DOMAIN/s: Bystin (InterPro:IPR007955)	Bystin	NO
AT1G31760	1.38613	1.63742	2.24264e-10	1.70893e-08	UP		SWIB/MDM2 domain superfamily protein	SWIB/MDM2 domain superfamily protein; CONTAINS InterPro DOMAIN/s: SWIB/MDM2 domain (InterPro:IPR003121), SWIB domain (InterPro:IPR019835); BEST Arabidopsis thaliana protein match is: SWIB/MDM2 domain superfamily protein (TAIR:AT2G35605.1)	SWIB domain | SWIB/MDM2 domain	NO
AT1G31812	0.32344	8.27334	0.00398768	0.0293379	UP		acyl-CoA-binding protein 6	acyl-CoA-binding protein 6 (ACBP6); FUNCTIONS IN: phosphatidylcholine binding, acyl-CoA binding; INVOLVED IN: response to freezing, response to cold, lipid transport; LOCATED IN: cytosol, plasma membrane; EXPRESSED IN: 25 plant structures; EXPRESSED DURING: 16 growth stages; CONTAINS InterPro DOMAIN/s: Acyl-CoA-binding protein, ACBP (InterPro:IPR000582), FERM/acyl-CoA-binding protein, 3-helical b…	Acyl-CoA-binding protein, ACBP | FERM/acyl-CoA-binding protein, 3-helical bundle	NO
AT1G31817	0.467318	3.70633	0.000456802	0.00509624	UP		Ribosomal L18p/L5e family protein	NUCLEAR FUSION DEFECTIVE 3 (NFD3); FUNCTIONS IN: structural constituent of ribosome; INVOLVED IN: translation; LOCATED IN: cytosolic small ribosomal subunit, ribosome, intracellular; EXPRESSED IN: 23 plant structures; EXPRESSED DURING: 15 growth stages; CONTAINS InterPro DOMAIN/s: Ribosomal protein S11 (InterPro:IPR001971); BEST Arabidopsis thaliana protein match is: ribosomal protein S11 (TAIR:A…	Ribosomal protein S11	NO
AT1G31835	-1.57962	0.44541	3.85973e-06	9.27262e-05	DOWN			unknown protein; FUNCTIONS IN: molecular_function unknown; INVOLVED IN: biological_process unknown; LOCATED IN: endomembrane system		NO
AT1G31840	0.851054	0.275124	0.00217575	0.0180942	UP		Tetratricopeptide repeat (TPR)-like superfamily protein	Tetratricopeptide repeat (TPR)-like superfamily protein; LOCATED IN: endomembrane system; EXPRESSED IN: 21 plant structures; EXPRESSED DURING: 11 growth stages; CONTAINS InterPro DOMAIN/s: Pentatricopeptide repeat (InterPro:IPR002885); BEST Arabidopsis thaliana protein match is: Pentatricopeptide repeat (PPR) superfamily protein (TAIR:AT3G22470.1); BEST Arabidopsis thaliana protein match is: Tetr…	Pentatricopeptide repeat | Tetratricopeptide-like helical domain	NO
AT1G31850	0.358317	5.12568	0.000698008	0.00720049	UP		S-adenosyl-L-methionine-dependent methyltransferases superfamily protein	S-adenosyl-L-methionine-dependent methyltransferases superfamily protein; CONTAINS InterPro DOMAIN/s: Protein of unknown function DUF248, methyltransferase putative (InterPro:IPR004159); BEST Arabidopsis thaliana protein match is: S-adenosyl-L-methionine-dependent methyltransferases superfamily protein (TAIR:AT4G19120.2)	Putative S-adenosyl-L-methionine-dependent methyltransferase | S-adenosyl-L-methionine-dependent methyltransferase-like	NO
AT1G31860	0.468476	3.87292	0.00025131	0.00311534	UP		histidine biosynthesis bifunctional protein (HISIE)	AT-IE; FUNCTIONS IN: phosphoribosyl-AMP cyclohydrolase activity, phosphoribosyl-ATP diphosphatase activity; INVOLVED IN: histidine biosynthetic process; LOCATED IN: chloroplast; EXPRESSED IN: 22 plant structures; EXPRESSED DURING: 13 growth stages; CONTAINS InterPro DOMAIN/s: Phosphoribosyl-AMP cyclohydrolase (InterPro:IPR002496), Phosphoribosyl-ATP pyrophosphohydrolase (InterPro:IPR008179), Phos…	Phosphoribosyl-AMP cyclohydrolase domain | Phosphoribosyl-ATP pyrophosphohydrolase | Phosphoribosyl-ATP pyrophosphohydrolase-like	NO
AT1G31870	0.981529	5.08748	1.24092e-19	4.00805e-17	UP	YES		unknown protein; FUNCTIONS IN: molecular_function unknown; INVOLVED IN: biological_process unknown; LOCATED IN: cytosol, nucleus; EXPRESSED IN: 25 plant structures; EXPRESSED DURING: 15 growth stages; CONTAINS InterPro DOMAIN/s: Protein of unknown function DUF2050, pre-mRNA-splicing factor (InterPro:IPR018609)	Bud13	NO
AT1G31970	0.717548	5.81013	4.68801e-11	4.22185e-09	UP		DEA(D/H)-box RNA helicase family protein	STRESS RESPONSE SUPPRESSOR 1 (STRS1); FUNCTIONS IN: helicase activity, nucleic acid binding, ATP-dependent helicase activity, ATP binding; EXPRESSED IN: 24 plant structures; EXPRESSED DURING: 13 growth stages; CONTAINS InterPro DOMAIN/s: RNA helicase, DEAD-box type, Q motif (InterPro:IPR014014), DNA/RNA helicase, DEAD/DEAH box type, N-terminal (InterPro:IPR011545), RNA helicase, ATP-dependent, DE…	DEAD/DEAH box helicase domain | Helicase, C-terminal | Helicase, superfamily 1/2, ATP-binding domain | P-loop containing nucleoside triphosphate hydrolase | RNA helicase, ATP-dependent, DEAD-box, conserved site | RNA helicase, DEAD-box type, Q motif	NO
AT1G32070	-0.400452	6.09463	8.97626e-06	0.000190864	DOWN		nuclear shuttle interacting	nuclear shuttle interacting (NSI); FUNCTIONS IN: N-acetyltransferase activity; INVOLVED IN: pathogenesis, metabolic process, spread of virus in host; LOCATED IN: nucleus, chloroplast; EXPRESSED IN: 25 plant structures; EXPRESSED DURING: 13 growth stages; CONTAINS InterPro DOMAIN/s: GCN5-related N-acetyltransferase, C-terminal (InterPro:IPR022610), GCN5-related N-acetyltransferase (InterPro:IPR000…	Acyl-CoA N-acyltransferase | GNAT domain	NO
AT1G32080	-0.544281	8.32797	5.64372e-08	2.46865e-06	DOWN		membrane protein, putative	membrane protein, putative; LOCATED IN: chloroplast, chloroplast inner membrane, membrane, chloroplast envelope; EXPRESSED IN: 21 plant structures; EXPRESSED DURING: 13 growth stages; CONTAINS InterPro DOMAIN/s: LrgB-like protein (InterPro:IPR007300)	CidB/LrgB family	NO
AT1G32120	0.547846	1.89097	0.00440891	0.0316758	UP			FUNCTIONS IN: molecular_function unknown; INVOLVED IN: biological_process unknown; LOCATED IN: membrane; EXPRESSED IN: 14 plant structures; EXPRESSED DURING: 4 anthesis, C globular stage, F mature embryo stage, petal differentiation and expansion stage, E expanded cotyledon stage; CONTAINS InterPro DOMAIN/s: Aminotransferase-like, plant mobile domain (InterPro:IPR019557), Protein of unknown funct…	Aminotransferase-like, plant mobile domain | Protein of unknown function DUF716 (TMEM45)	NO
AT1G32160	-0.2864	6.44619	0.00172175	0.0149459	DOWN		Protein of unknown function (DUF760)	Protein of unknown function (DUF760); FUNCTIONS IN: molecular_function unknown; INVOLVED IN: biological_process unknown; LOCATED IN: chloroplast; EXPRESSED IN: 22 plant structures; EXPRESSED DURING: 13 growth stages; CONTAINS InterPro DOMAIN/s: Protein of unknown function DUF760 (InterPro:IPR008479); BEST Arabidopsis thaliana protein match is: Protein of unknown function (DUF760) (TAIR:AT1G48450.…	Protein of unknown function DUF760	NO
AT1G32210	0.344924	4.63439	0.00132841	0.0121516	UP		Defender against death (DAD family) protein	DEFENDER AGAINST APOPTOTIC DEATH 1 (ATDAD1); FUNCTIONS IN: molecular_function unknown; INVOLVED IN: anti-apoptosis; LOCATED IN: endoplasmic reticulum, membrane; EXPRESSED IN: 26 plant structures; EXPRESSED DURING: 14 growth stages; CONTAINS InterPro DOMAIN/s: Defender against death DAD protein (InterPro:IPR003038); BEST Arabidopsis thaliana protein match is: Defender against death (DAD family) pr…	DAD/Ost2	NO
AT1G32220	-0.342588	6.61965	0.000716468	0.0073504	DOWN		NAD(P)-binding Rossmann-fold superfamily protein	NAD(P)-binding Rossmann-fold superfamily protein; FUNCTIONS IN: coenzyme binding, binding, catalytic activity; INVOLVED IN: response to oxidative stress; LOCATED IN: thylakoid, chloroplast, plastoglobule; EXPRESSED IN: 24 plant structures; EXPRESSED DURING: 15 growth stages; CONTAINS InterPro DOMAIN/s: NAD-dependent epimerase/dehydratase (InterPro:IPR001509), NAD(P)-binding domain (InterPro:IPR01…	NAD(P)-binding domain	NO
AT1G32375	2.38518	-0.536885	1.2883e-11	1.27998e-09	UP		F-box/RNI-like/FBD-like domains-containing protein	F-box/RNI-like/FBD-like domains-containing protein; FUNCTIONS IN: molecular_function unknown; INVOLVED IN: biological_process unknown; LOCATED IN: endomembrane system; EXPRESSED IN: 7 plant structures; EXPRESSED DURING: 4 anthesis, F mature embryo stage, petal differentiation and expansion stage, E expanded cotyledon stage, D bilateral stage; CONTAINS InterPro DOMAIN/s: FBD (InterPro:IPR013596), …	F-box domain | FBD domain | Leucine-rich repeat 2	NO
AT1G32415	0.576327	1.32601	0.00722512	0.0468789	UP		pentatricopeptide (PPR) repeat-containing protein	pentatricopeptide (PPR) repeat-containing protein; CONTAINS InterPro DOMAIN/s: Pentatricopeptide repeat (InterPro:IPR002885); BEST Arabidopsis thaliana protein match is: Tetratricopeptide repeat (TPR)-like superfamily protein (TAIR:AT1G53600.1)	Pentatricopeptide repeat | Tetratricopeptide-like helical domain	NO
AT1G32450	-1.05885	3.9522	3.12219e-11	2.89693e-09	DOWN		nitrate transporter 1.5	nitrate transporter 1.5 (NRT1.5); CONTAINS InterPro DOMAIN/s: Oligopeptide transporter (InterPro:IPR000109), Major facilitator superfamily, general substrate transporter (InterPro:IPR016196); BEST Arabidopsis thaliana protein match is: NITRATE TRANSPORTER 1.8 (TAIR:AT4G21680.1)	Major facilitator superfamily domain, general substrate transporter | Proton-dependent oligopeptide transporter family	NO
AT1G32490	0.333627	5.8669	0.000415326	0.00470047	UP	YES	RNA helicase family protein	ENHANCED SILENCING PHENOTYPE 3 (ESP3); FUNCTIONS IN: helicase activity, ATP-dependent RNA helicase activity, ATP binding, ATP-dependent helicase activity, nucleic acid binding; INVOLVED IN: RNA splicing, posttranscriptional gene silencing by RNA, embryo development ending in seed dormancy; LOCATED IN: endomembrane system; EXPRESSED IN: 23 plant structures; EXPRESSED IN: 24 plant structures; EXPRE…	DEAD/DEAH box helicase domain | DNA/RNA helicase, ATP-dependent, DEAH-box type, conserved site | Domain of unknown function DUF1605 | Helicase, C-terminal | Helicase, superfamily 1/2, ATP-binding domain | Helicase-associated domain | P-loop containing nucleoside triphosphate hydrolase	NO
AT1G32520	-0.56256	5.08309	3.56924e-06	8.71126e-05	DOWN			unknown protein; FUNCTIONS IN: molecular_function unknown; INVOLVED IN: biological_process unknown; LOCATED IN: chloroplast; EXPRESSED IN: 24 plant structures; EXPRESSED DURING: 15 growth stages	TLDc domain	NO
AT1G32580	0.5206	5.39173	3.97382e-07	1.33976e-05	UP		plastid developmental protein DAG, putative	plastid developmental protein DAG, putative; BEST Arabidopsis thaliana protein match is: plastid developmental protein DAG, putative (TAIR:AT2G35240.1)		NO
AT1G32583	-0.872582	1.40153	3.24361e-05	0.000570187	DOWN			FUNCTIONS IN: molecular_function unknown; INVOLVED IN: biological_process unknown; LOCATED IN: endomembrane system; BEST Arabidopsis thaliana protein match is: tapetum determinant 1 (TAIR:AT4G24972.1)		NO
AT1G32730	0.733703	2.72606	1.7957e-06	4.88537e-05	UP			unknown protein; LOCATED IN: chloroplast; EXPRESSED IN: 12 plant structures; EXPRESSED DURING: 6 growth stages; CONTAINS InterPro DOMAIN/s: Protein of unknown function DUF702 (InterPro:IPR007818)	Protein of unknown function DUF702	NO
AT1G32760	0.699215	2.38686	3.31396e-05	0.000581038	UP		Glutaredoxin family protein	Glutaredoxin family protein; FUNCTIONS IN: electron carrier activity, protein disulfide oxidoreductase activity; INVOLVED IN: cell redox homeostasis; LOCATED IN: chloroplast; EXPRESSED IN: 12 plant structures; EXPRESSED DURING: 6 growth stages; CONTAINS InterPro DOMAIN/s: Thioredoxin fold (InterPro:IPR012335), Glutaredoxin (InterPro:IPR002109), Thioredoxin-like fold (InterPro:IPR012336); BEST Ara…	Glutaredoxin | Thioredoxin-like fold	NO
AT1G32780	-1.62285	2.18916	1.22175e-09	8.24646e-08	DOWN		GroES-like zinc-binding dehydrogenase family protein	GroES-like zinc-binding dehydrogenase family protein; FUNCTIONS IN: oxidoreductase activity, zinc ion binding; INVOLVED IN: oxidation reduction; EXPRESSED IN: 12 plant structures; EXPRESSED DURING: LP.04 four leaves visible, 4 anthesis, LP.02 two leaves visible, petal differentiation and expansion stage, D bilateral stage; CONTAINS InterPro DOMAIN/s: GroES-like (InterPro:IPR011032), Alcohol dehyd…	Alcohol dehydrogenase GroES-like | Alcohol dehydrogenase superfamily, zinc-type | Alcohol dehydrogenase, C-terminal | Alcohol dehydrogenase, zinc-type, conserved site | GroES (chaperonin 10)-like | NAD(P)-binding domain	YES	1:11870625:A-AT;intronic_variant
AT1G32900	-0.350293	6.76956	0.00101116	0.00976403	DOWN		UDP-Glycosyltransferase superfamily protein	UDP-Glycosyltransferase superfamily protein; FUNCTIONS IN: protein binding, transferase activity, transferring glycosyl groups; INVOLVED IN: biosynthetic process, glucan biosynthetic process; LOCATED IN: chloroplast; EXPRESSED IN: 21 plant structures; EXPRESSED DURING: 13 growth stages; CONTAINS InterPro DOMAIN/s: Glycogen/starch synthases, ADP-glucose type (InterPro:IPR011835), Starch synthase, …	Glycogen/starch synthase, ADP-glucose type | Glycosyl transferase, family 1 | Starch synthase, catalytic domain	NO
AT1G32950	-2.62007	-1.11569	9.42465e-09	4.99106e-07	DOWN		Subtilase family protein	Subtilase family protein; FUNCTIONS IN: identical protein binding, serine-type endopeptidase activity; INVOLVED IN: proteolysis, negative regulation of catalytic activity; LOCATED IN: endomembrane system; EXPRESSED IN: stem, stamen; EXPRESSED DURING: 4 anthesis; CONTAINS InterPro DOMAIN/s: Protease-associated PA (InterPro:IPR003137), Proteinase inhibitor, propeptide (InterPro:IPR009020), Peptidas…	Peptidase S8, subtilisin, His-active site | Peptidase S8, subtilisin, Ser-active site | Peptidase S8, subtilisin-related | Peptidase S8/S53 domain | Protease-associated domain, PA | Proteinase inhibitor I9	NO
AT1G32960	-2.53577	-2.69864	0.00553394	0.0380618	DOWN		Subtilase family protein	SBT3.3; FUNCTIONS IN: identical protein binding, serine-type endopeptidase activity; INVOLVED IN: proteolysis, negative regulation of catalytic activity; LOCATED IN: apoplast, plant-type cell wall; EXPRESSED IN: 7 plant structures; EXPRESSED DURING: 4 anthesis; CONTAINS InterPro DOMAIN/s: Protease-associated PA (InterPro:IPR003137), Proteinase inhibitor, propeptide (InterPro:IPR009020), Peptidase…	Peptidase S8, subtilisin, His-active site | Peptidase S8, subtilisin, Ser-active site | Peptidase S8, subtilisin-related | Peptidase S8/S53 domain | Protease-associated domain, PA | Proteinase inhibitor I9	NO
AT1G33030	-2.24739	-1.35102	0.000562202	0.00604583	DOWN		O-methyltransferase family protein	O-methyltransferase family protein; CONTAINS InterPro DOMAIN/s: Winged helix-turn-helix transcription repressor DNA-binding (InterPro:IPR011991), Plant methyltransferase dimerisation (InterPro:IPR012967), O-methyltransferase, family 2 (InterPro:IPR001077), O-methyltransferase, COMT, eukaryota (InterPro:IPR016461); BEST Arabidopsis thaliana protein match is: O-methyltransferase 1 (TAIR:AT5G54160.1)	Caffeate O-methyltransferase (COMT) family | O-methyltransferase, family 2 | Plant methyltransferase dimerisation | S-adenosyl-L-methionine-dependent methyltransferase-like | Winged helix-turn-helix DNA-binding domain	NO
AT1G33050	0.391903	6.73872	0.000127548	0.00177322	UP			unknown protein; FUNCTIONS IN: molecular_function unknown; INVOLVED IN: biological_process unknown; LOCATED IN: cellular_component unknown; EXPRESSED IN: 24 plant structures; EXPRESSED IN: 25 plant structures; EXPRESSED DURING: 15 growth stages; BEST Arabidopsis thaliana protein match is: unknown protein (TAIR:AT4G10470.1)		NO
AT1G33055	1.04269	4.26793	2.84316e-07	9.99586e-06	UP			unknown protein; FUNCTIONS IN: molecular_function unknown; INVOLVED IN: anaerobic respiration; LOCATED IN: endomembrane system; EXPRESSED IN: 13 plant structures; EXPRESSED DURING: 6 growth stages		NO
AT1G33102	-0.6174	2.25868	0.000356278	0.00418174	DOWN			unknown protein; FUNCTIONS IN: molecular_function unknown; INVOLVED IN: biological_process unknown; LOCATED IN: cellular_component unknown		NO
AT1G33110	-0.326591	6.77354	0.00516551	0.0359982	DOWN		MATE efflux family protein	MATE efflux family protein; FUNCTIONS IN: antiporter activity, drug transmembrane transporter activity, transporter activity; INVOLVED IN: drug transmembrane transport, transmembrane transport; LOCATED IN: membrane; EXPRESSED IN: 22 plant structures; EXPRESSED DURING: 13 growth stages; CONTAINS InterPro DOMAIN/s: Multi antimicrobial extrusion protein MatE (InterPro:IPR002528); BEST Arabidopsis th…	Multi antimicrobial extrusion protein	NO
AT1G33120	0.528307	6.938	1.70991e-07	6.44199e-06	UP		Ribosomal protein L6 family	Ribosomal protein L6 family; FUNCTIONS IN: structural constituent of ribosome, rRNA binding; INVOLVED IN: translation; LOCATED IN: in 7 components; EXPRESSED IN: fruit, cultured cell, leaf; CONTAINS InterPro DOMAIN/s: Ribosomal protein L6 (InterPro:IPR000702), Ribosomal protein L6, alpha-beta domain (InterPro:IPR020040), Ribosomal protein L6, conserved site-2 (InterPro:IPR002359); BEST Arabidopsi…	Ribosomal protein L6 | Ribosomal protein L6, alpha-beta domain | Ribosomal protein L6, conserved site-2	NO
AT1G33140	0.395718	7.72388	5.36665e-05	0.000871524	UP		Ribosomal protein L6 family	PIGGYBACK2 (PGY2); FUNCTIONS IN: structural constituent of ribosome, rRNA binding; INVOLVED IN: adaxial/abaxial pattern formation, translation; LOCATED IN: cytosolic large ribosomal subunit, vacuole, large ribosomal subunit, membrane, chloroplast envelope; EXPRESSED IN: 7 plant structures; EXPRESSED DURING: L mature pollen stage, M germinated pollen stage; CONTAINS InterPro DOMAIN/s: Ribosomal pr…	Ribosomal protein L6 | Ribosomal protein L6, alpha-beta domain | Ribosomal protein L6, conserved site-2	NO
AT1G33410	0.594616	5.31745	4.86281e-07	1.60102e-05	UP		SUPPRESSOR OF AUXIN RESISTANCE1	SUPPRESSOR OF AUXIN RESISTANCE1 (SAR1); INVOLVED IN: mRNA export from nucleus, response to auxin stimulus, developmental process; LOCATED IN: nuclear membrane; EXPRESSED IN: 21 plant structures; EXPRESSED DURING: 13 growth stages; CONTAINS InterPro DOMAIN/s: Nucleoporin Nup120/160 (InterPro:IPR021717)	Nucleoporin Nup120/160	NO
AT1G33420	0.730742	1.90017	2.26379e-05	0.000417332	UP		RING/FYVE/PHD zinc finger superfamily protein	RING/FYVE/PHD zinc finger superfamily protein; FUNCTIONS IN: DNA binding, zinc ion binding; INVOLVED IN: regulation of transcription, DNA-dependent; EXPRESSED IN: 22 plant structures; EXPRESSED DURING: 13 growth stages; CONTAINS InterPro DOMAIN/s: Zinc finger, PHD-type, conserved site (InterPro:IPR019786), Zinc finger, PHD-type (InterPro:IPR001965), Zinc finger, FYVE/PHD-type (InterPro:IPR011011)…	Zinc finger, FYVE/PHD-type | Zinc finger, PHD-finger | Zinc finger, PHD-type | Zinc finger, PHD-type, conserved site | Zinc finger, RING/FYVE/PHD-type	NO
AT1G33475	0.52804	1.97701	0.0066978	0.0441505	UP		SNARE-like superfamily protein	SNARE-like superfamily protein; INVOLVED IN: transport; EXPRESSED IN: inflorescence meristem, sepal, male gametophyte, petiole, carpel; EXPRESSED DURING: 4 anthesis; CONTAINS InterPro DOMAIN/s: Longin-like (InterPro:IPR011012); BEST Arabidopsis thaliana protein match is: SNARE-like superfamily protein (TAIR:AT4G10170.2)	Longin domain | Longin-like domain	NO
AT1G33480	0.488357	4.24736	0.00183795	0.0157597	UP		RING/U-box superfamily protein	RING/U-box superfamily protein; FUNCTIONS IN: zinc ion binding; CONTAINS InterPro DOMAIN/s: Zinc finger, RING-type (InterPro:IPR001841), Zinc finger, C3HC4 RING-type (InterPro:IPR018957); BEST Arabidopsis thaliana protein match is: RING/U-box superfamily protein (TAIR:AT4G10150.1)	Zinc finger, RING-type | Zinc finger, RING/FYVE/PHD-type	NO
AT1G33600	-0.515654	4.9833	6.58279e-05	0.00102523	DOWN		Leucine-rich repeat (LRR) family protein	Leucine-rich repeat (LRR) family protein; INVOLVED IN: signal transduction; LOCATED IN: cell wall, membrane, plant-type cell wall; EXPRESSED IN: 22 plant structures; EXPRESSED DURING: 13 growth stages; CONTAINS InterPro DOMAIN/s: Leucine-rich repeat-containing N-terminal domain, type 2 (InterPro:IPR013210), Leucine-rich repeat (InterPro:IPR001611); BEST Arabidopsis thaliana protein match is: Leuc…	Leucine-rich repeat | Leucine-rich repeat-containing N-terminal, type 2	YES	1:12182360:AG-A;intronic_variant
AT1G33680	0.421515	5.88838	3.99419e-05	0.000681057	UP		KH domain-containing protein	KH domain-containing protein; FUNCTIONS IN: RNA binding, nucleic acid binding; INVOLVED IN: biological_process unknown; LOCATED IN: cellular_component unknown; EXPRESSED IN: 21 plant structures; EXPRESSED DURING: 13 growth stages; CONTAINS InterPro DOMAIN/s: K Homology, type 1, subgroup (InterPro:IPR018111), K Homology (InterPro:IPR004087), K Homology, type 1 (InterPro:IPR004088); BEST Arabidopsi…	K Homology domain | K Homology domain, type 1	NO
AT1G33770	1.34633	-0.588005	0.0021905	0.0181989	UP		Protein kinase superfamily protein	Protein kinase superfamily protein; FUNCTIONS IN: protein serine/threonine kinase activity, protein kinase activity, kinase activity, ATP binding; INVOLVED IN: protein amino acid phosphorylation, N-terminal protein myristoylation; LOCATED IN: cellular_component unknown; EXPRESSED IN: 7 plant structures; EXPRESSED DURING: 6 growth stages; CONTAINS InterPro DOMAIN/s: Protein kinase, ATP binding sit…	Protein kinase domain | Protein kinase, ATP binding site | Protein kinase-like domain | Serine/threonine-protein kinase, active site | Serine/threonine/dual specificity protein kinase, catalytic domain	NO
AT1G33960	-2.04399	-0.604756	0.004796	0.0338575	DOWN		P-loop containing nucleoside triphosphate hydrolases superfamily protein	AVRRPT2-INDUCED GENE 1 (AIG1); FUNCTIONS IN: GTP binding; INVOLVED IN: response to bacterium; EXPRESSED IN: 11 plant structures; EXPRESSED DURING: 8 growth stages; CONTAINS InterPro DOMAIN/s: AIG1 (InterPro:IPR006703); BEST Arabidopsis thaliana protein match is: Avirulence induced gene (AIG1) family protein (TAIR:AT1G33950.1)	AIG1 | P-loop containing nucleoside triphosphate hydrolase	NO
AT1G34000	-0.439275	7.55432	1.06369e-05	0.000220877	DOWN		one-helix protein 2	one-helix protein 2 (OHP2); FUNCTIONS IN: molecular_function unknown; INVOLVED IN: response to light intensity; LOCATED IN: chloroplast thylakoid membrane, chloroplast; EXPRESSED IN: 22 plant structures; EXPRESSED DURING: 13 growth stages	Chlorophyll a/b binding protein domain	NO
AT1G34030	0.451615	6.32201	3.66188e-06	8.89887e-05	UP		Ribosomal protein S13/S18 family	Ribosomal protein S13/S18 family; FUNCTIONS IN: structural constituent of ribosome, protein binding; INVOLVED IN: translation; LOCATED IN: in 6 components; EXPRESSED IN: 23 plant structures; EXPRESSED DURING: 13 growth stages; CONTAINS InterPro DOMAIN/s: Ribosomal protein S13-like, H2TH (InterPro:IPR010979), Ribosomal protein S13, conserved site (InterPro:IPR018269), Ribosomal protein S13 (InterP…	30s ribosomal protein S13, C-terminal | Ribosomal protein S13 | Ribosomal protein S13, conserved site | Ribosomal protein S13-like, H2TH	NO
AT1G34040	-0.908385	0.646051	0.00177245	0.0152954	DOWN		Pyridoxal phosphate (PLP)-dependent transferases superfamily protein	Pyridoxal phosphate (PLP)-dependent transferases superfamily protein; FUNCTIONS IN: pyridoxal phosphate binding, carbon-sulfur lyase activity, catalytic activity; INVOLVED IN: biological_process unknown; LOCATED IN: endomembrane system; CONTAINS InterPro DOMAIN/s: Pyridoxal phosphate-dependent transferase, major domain (InterPro:IPR015424), EGF-like, alliinase (InterPro:IPR006947), Pyridoxal phos…	Allinase, C-terminal | EGF-like, alliinase | Pyridoxal phosphate-dependent transferase | Pyridoxal phosphate-dependent transferase, major region, subdomain 1 | Pyridoxal phosphate-dependent transferase, major region, subdomain 2	NO
AT1G34044	-3.56911	-1.00884	2.20202e-12	2.53993e-10	DOWN					NO
AT1G34065	0.80024	1.96501	7.20277e-06	0.00015856	UP		S-adenosylmethionine carrier 2	S-adenosylmethionine carrier 2 (SAMC2); FUNCTIONS IN: binding; INVOLVED IN: transport, mitochondrial transport, transmembrane transport; LOCATED IN: mitochondrial inner membrane, membrane; EXPRESSED IN: 22 plant structures; EXPRESSED DURING: 13 growth stages; CONTAINS InterPro DOMAIN/s: Mitochondrial carrier protein (InterPro:IPR002067), Mitochondrial substrate carrier (InterPro:IPR001993), Mitoc…	Mitochondrial carrier domain | Mitochondrial carrier protein | Mitochondrial substrate/solute carrier	NO
AT1G34160	0.86941	1.77723	5.99525e-06	0.000134977	UP		Tetratricopeptide repeat (TPR)-like superfamily protein	Tetratricopeptide repeat (TPR)-like superfamily protein; CONTAINS InterPro DOMAIN/s: Pentatricopeptide repeat (InterPro:IPR002885); BEST Arabidopsis thaliana protein match is: Tetratricopeptide repeat (TPR)-like superfamily protein (TAIR:AT4G21065.1)	Pentatricopeptide repeat	NO
AT1G34210	-0.5783	5.05641	2.06989e-05	0.000389039	DOWN		somatic embryogenesis receptor-like kinase 2	somatic embryogenesis receptor-like kinase 2 (SERK2); FUNCTIONS IN: kinase activity; INVOLVED IN: pollen maturation, microsporogenesis; LOCATED IN: plasma membrane; EXPRESSED IN: 23 plant structures; EXPRESSED DURING: 14 growth stages; CONTAINS InterPro DOMAIN/s: Protein kinase, ATP binding site (InterPro:IPR017441), Protein kinase, catalytic domain (InterPro:IPR000719), Leucine-rich repeat-conta…	Concanavalin A-like lectin/glucanase, subgroup | Leucine-rich repeat | Leucine-rich repeat-containing N-terminal, type 2 | Protein kinase domain | Protein kinase, ATP binding site | Protein kinase-like domain | Serine-threonine/tyrosine-protein kinase catalytic domain | Serine/threonine-protein kinase, active site	NO
AT1G34245	0.708056	1.21269	0.00672189	0.0442533	UP		Putative membrane lipoprotein	EPIDERMAL PATTERNING FACTOR 2 (EPF2); FUNCTIONS IN: molecular_function unknown; INVOLVED IN: stomatal complex development, guard cell differentiation; LOCATED IN: endomembrane system; EXPRESSED IN: 15 plant structures; EXPRESSED DURING: 9 growth stages; BEST Arabidopsis thaliana protein match is: unknown protein (TAIR:AT1G71866.1)		NO
AT1G34315	-0.80238	1.87784	0.00100225	0.00969187	DOWN			unknown protein; FUNCTIONS IN: molecular_function unknown; INVOLVED IN: biological_process unknown; LOCATED IN: endomembrane system; BEST Arabidopsis thaliana protein match is: unknown protein (TAIR:AT3G31400.1)		NO
AT1G34350	0.445837	2.85122	0.00332528	0.0254484	UP			unknown protein; FUNCTIONS IN: molecular_function unknown; INVOLVED IN: biological_process unknown; LOCATED IN: cellular_component unknown; EXPRESSED IN: 23 plant structures; EXPRESSED DURING: 13 growth stages	Transmembrane protein 18	NO
AT1G34355	0.794313	1.76779	0.00170612	0.0148408	UP		forkhead-associated (FHA) domain-containing protein	PARALLEL SPINDLE 1 (PS1); CONTAINS InterPro DOMAIN/s: SMAD/FHA domain (InterPro:IPR008984), Nucleotide binding protein, PINc (InterPro:IPR006596), Forkhead-associated (FHA) domain (InterPro:IPR000253); BEST Arabidopsis thaliana protein match is: unknown protein (TAIR:AT2G34110.1)	Forkhead-associated (FHA) domain | PIN domain | PIN domain-like | SMAD/FHA domain | Transmembrane protein 18	NO
AT1G34540	-2.26661	-1.61982	0.000133754	0.00184555	DOWN		cytochrome P450, family 94, subfamily D, polypeptide 1	cytochrome P450, family 94, subfamily D, polypeptide 1 (CYP94D1); FUNCTIONS IN: electron carrier activity, monooxygenase activity, iron ion binding, oxygen binding, heme binding; INVOLVED IN: oxidation reduction; LOCATED IN: endomembrane system; CONTAINS InterPro DOMAIN/s: Cytochrome P450 (InterPro:IPR001128), Cytochrome P450, E-class, group I (InterPro:IPR002401), Cytochrome P450, conserved site…	Cytochrome P450 | Cytochrome P450, E-class, group I | Cytochrome P450, conserved site	NO
AT1G34570	-0.512052	4.13767	1.78405e-05	0.000342405	DOWN		Essential protein Yae1, N-terminal	Essential protein Yae1, N-terminal; CONTAINS InterPro DOMAIN/s: Essential protein Yae1, N-terminal (InterPro:IPR019191); BEST Arabidopsis thaliana protein match is: Essential protein Yae1, N-terminal (TAIR:AT3G15750.1)	Essential protein Yae1, N-terminal	NO
AT1G34750	-0.766321	2.86016	3.73119e-07	1.26812e-05	DOWN		Protein phosphatase 2C family protein	Protein phosphatase 2C family protein; FUNCTIONS IN: protein serine/threonine phosphatase activity, catalytic activity; INVOLVED IN: biological_process unknown; LOCATED IN: plasma membrane; EXPRESSED IN: 25 plant structures; EXPRESSED DURING: 13 growth stages; CONTAINS InterPro DOMAIN/s: Protein phosphatase 2C-related (InterPro:IPR001932), Protein phosphatase 2C (InterPro:IPR015655), Protein phos…	Protein phosphatase 2C | Protein phosphatase 2C (PP2C)-like domain	NO
AT1G34844	-0.866416	2.37423	1.60495e-06	4.43811e-05	DOWN		other RNA			NO
AT1G35190	-0.300367	4.95632	0.00286172	0.0225411	DOWN		2-oxoglutarate (2OG) and Fe(II)-dependent oxygenase superfamily protein	2-oxoglutarate (2OG) and Fe(II)-dependent oxygenase superfamily protein; FUNCTIONS IN: oxidoreductase activity, acting on paired donors, with incorporation or reduction of molecular oxygen, 2-oxoglutarate as one donor, and incorporation of one atom each of oxygen into both donors, oxidoreductase activity, iron ion binding; INVOLVED IN: oxidation reduction, alkaloid biosynthetic process; LOCATED I…	Isopenicillin N synthase | Isopenicillin N synthase-like | Non-haem dioxygenase N-terminal domain | Oxoglutarate/iron-dependent dioxygenase	NO
AT1G35310	0.887566	2.28675	0.000194598	0.00251507	UP		MLP-like protein 168	MLP-like protein 168 (MLP168); FUNCTIONS IN: molecular_function unknown; INVOLVED IN: response to biotic stimulus, defense response; LOCATED IN: cellular_component unknown; EXPRESSED IN: 13 plant structures; EXPRESSED DURING: LP.04 four leaves visible, 4 anthesis, C globular stage, petal differentiation and expansion stage; CONTAINS InterPro DOMAIN/s: Bet v I allergen (InterPro:IPR000916); BEST A…	Bet v I domain | Major latex protein domain | START-like domain	NO
AT1G35320	-0.987756	3.15709	2.76746e-09	1.71161e-07	DOWN			unknown protein; BEST Arabidopsis thaliana protein match is: unknown protein (TAIR:AT3G30160.1)		NO
AT1G35340	-0.244823	5.90299	0.00781658	0.0499943	DOWN		ATP-dependent protease La (LON) domain protein	ATP-dependent protease La (LON) domain protein; FUNCTIONS IN: ATP-dependent peptidase activity; INVOLVED IN: proteolysis; EXPRESSED IN: 22 plant structures; LOCATED IN: chloroplast; EXPRESSED DURING: 14 growth stages; CONTAINS InterPro DOMAIN/s: Peptidase S16, lon N-terminal (InterPro:IPR003111)	PUA-like domain | Peptidase S16, lon N-terminal	NO
AT1G35350	-0.965504	3.16184	0.000711449	0.00731397	DOWN		EXS (ERD1/XPR1/SYG1) family protein	EXS (ERD1/XPR1/SYG1) family protein; LOCATED IN: integral to membrane; EXPRESSED IN: 18 plant structures; EXPRESSED DURING: 9 growth stages; CONTAINS InterPro DOMAIN/s: EXS, C-terminal (InterPro:IPR004342), SPX, N-terminal (InterPro:IPR004331); BEST Arabidopsis thaliana protein match is: EXS (ERD1/XPR1/SYG1) family protein (TAIR:AT1G26730.1)	EXS, C-terminal | SPX, N-terminal	NO
AT1G35420	-0.317411	6.45776	0.000621414	0.00655491	DOWN		alpha/beta-Hydrolases superfamily protein	alpha/beta-Hydrolases superfamily protein; FUNCTIONS IN: hydrolase activity; INVOLVED IN: biological_process unknown; EXPRESSED IN: 22 plant structures; LOCATED IN: chloroplast, chloroplast stroma; EXPRESSED DURING: 13 growth stages; CONTAINS InterPro DOMAIN/s: Dienelactone hydrolase (InterPro:IPR002925); BEST Arabidopsis thaliana protein match is: alpha/beta-Hydrolases superfamily protein (TAIR:…	Alpha/Beta hydrolase fold | Dienelactone hydrolase	NO
AT1G35513	1.33799	-0.447157	0.000566543	0.0060828	UP					NO
AT1G35530	0.984227	1.18109	1.57588e-05	0.000308051	UP		DEAD/DEAH box RNA helicase family protein	DEAD/DEAH box RNA helicase family protein ; FUNCTIONS IN: in 6 functions; LOCATED IN: cellular_component unknown; EXPRESSED IN: 17 plant structures; EXPRESSED DURING: 10 growth stages; CONTAINS InterPro DOMAIN/s: Restriction endonuclease, type I, R subunit/Type III, Res subunit (InterPro:IPR006935), DEAD-like helicase, N-terminal (InterPro:IPR014001), DNA/RNA helicase, C-terminal (InterPro:IPR001…	Helicase, C-terminal | Helicase, superfamily 1/2, ATP-binding domain | Helicase/UvrB domain | P-loop containing nucleoside triphosphate hydrolase	NO
AT1G35612	-0.933032	5.14758	1.61459e-15	3.33183e-13	DOWN		transposable element gene	expressed protein		NO
AT1G35660	0.424438	4.14848	0.00114669	0.0108214	UP			unknown protein; FUNCTIONS IN: molecular_function unknown; INVOLVED IN: biological_process unknown; LOCATED IN: plasma membrane; EXPRESSED IN: 19 plant structures; EXPRESSED DURING: 11 growth stages		NO
AT1G35710	-2.90554	1.76023	2.04524e-14	3.49674e-12	DOWN		Protein kinase family protein with leucine-rich repeat domain	Protein kinase family protein with leucine-rich repeat domain; FUNCTIONS IN: protein serine/threonine kinase activity, protein tyrosine kinase activity, protein kinase activity, ATP binding; INVOLVED IN: transmembrane receptor protein tyrosine kinase signaling pathway, protein amino acid phosphorylation; LOCATED IN: endomembrane system; EXPRESSED IN: 22 plant structures; EXPRESSED DURING: 13 grow…	Concanavalin A-like lectin/glucanase, subgroup | Leucine-rich repeat | Leucine-rich repeat, typical subtype | Leucine-rich repeat-containing N-terminal, type 2 | Protein kinase domain | Protein kinase, ATP binding site | Protein kinase-like domain | Tyrosine-protein kinase, active site	NO
AT1G35780	0.555624	4.27568	5.09096e-05	0.000835616	UP			unknown protein; BEST Arabidopsis thaliana protein match is: unknown protein (TAIR:AT1G78150.2)	Domain of unknown function DUF4057	NO
AT1G35995	-3.69996	-3.29276	0.000220472	0.00278429	DOWN		transposable element gene	Mutator-like transposase family, has a 4.4e-38 P-value blast match to GB:AAA21566 mudrA of transposon="MuDR" (MuDr-element) (Zea mays)		NO
AT1G36320	-0.332855	6.47121	0.000375921	0.00435699	DOWN			unknown protein; BEST Arabidopsis thaliana protein match is: unknown protein (TAIR:AT4G37920.1)		NO
AT1G36330	-6.9322	-2.65215	5.61552e-08	2.45951e-06	DOWN		transposable element gene	gypsy-like retrotransposon family, has a 1.1e-71 P-value blast match to GB:AAD27547 polyprotein (Gypsy_Ty3-element) (Oryza sativa subsp. indica)		NO
AT1G36622	-2.60542	-1.41774	3.86457e-07	1.30685e-05	DOWN			unknown protein; LOCATED IN: endomembrane system; BEST Arabidopsis thaliana protein match is: unknown protein (TAIR:AT1G36640.1)		NO
AT1G36730	-0.405002	6.69903	0.000398289	0.00454692	DOWN		Translation initiation factor IF2/IF5	Translation initiation factor IF2/IF5; FUNCTIONS IN: binding, translation initiation factor activity; INVOLVED IN: translational initiation, regulation of translational initiation; EXPRESSED IN: sperm cell, male gametophyte, pollen tube; EXPRESSED DURING: L mature pollen stage, M germinated pollen stage; CONTAINS InterPro DOMAIN/s: Translation initiation factor IF2/IF5, N-terminal (InterPro:IPR01…	Armadillo-type fold | MIF4-like, type 1/2/3 | Translation initiation factor IF2/IF5 | Translation initiation factor IF2/IF5, N-terminal | Translation initiation factor IF2/IF5, zinc-binding | W2 domain	NO
AT1G37000	-3.86528	-1.79584	1.31053e-06	3.74067e-05	DOWN		Beta-galactosidase related protein	Beta-galactosidase related protein; FUNCTIONS IN: hydrolase activity, hydrolyzing O-glycosyl compounds; INVOLVED IN: carbohydrate metabolic process; CONTAINS InterPro DOMAIN/s: Glycoside hydrolase, family 35 (InterPro:IPR001944)		NO
AT1G37150	-1.38049	0.472748	3.35894e-06	8.26991e-05	DOWN		holocarboxylase synthetase 2	holocarboxylase synthetase 2 (HCS2); FUNCTIONS IN: biotin-[acetyl-CoA-carboxylase] ligase activity, catalytic activity; INVOLVED IN: protein modification process; EXPRESSED IN: pedicel; EXPRESSED DURING: 4 anthesis; CONTAINS InterPro DOMAIN/s: Biotin protein ligase, C-terminal (InterPro:IPR003142), Biotin/lipoate A/B protein ligase (InterPro:IPR004143), Biotin--acetyl-CoA-carboxylase ligase (Inte…	Biotin protein ligase, C-terminal | Biotin--acetyl-CoA-carboxylase ligase | Biotin/lipoate A/B protein ligase	NO
AT1G38450	4.6125	-3.54985	0.00700116	0.0457255	UP		transposable element gene	gypsy-like retrotransposon family (Athila), has a 9.8e-50 P-value blast match to GB:CAA57397 Athila ORF 1 (Arabidopsis thaliana)		YES	1:14494336:T-G;exonic_variant,1:14492293:A-AT;exonic_variant
AT1G41880	0.273865	6.43179	0.00368344	0.0275939	UP		Ribosomal protein L35Ae family protein	Ribosomal protein L35Ae family protein; FUNCTIONS IN: structural constituent of ribosome; INVOLVED IN: translation, ribosome biogenesis; LOCATED IN: ribosome, cytosolic large ribosomal subunit, membrane; EXPRESSED IN: leaf; CONTAINS InterPro DOMAIN/s: Ribosomal protein L35Ae (InterPro:IPR001780), Ribosomal protein L35Ae, conserved site (InterPro:IPR018266); BEST Arabidopsis thaliana protein match…	Ribosomal protein L35A | Ribosomal protein L35Ae, conserved site | Translation protein, beta-barrel domain	NO
AT1G42440	0.366574	4.98353	0.000252172	0.00312164	UP			FUNCTIONS IN: molecular_function unknown; INVOLVED IN: ribosome biogenesis; LOCATED IN: nucleus; EXPRESSED IN: 22 plant structures; EXPRESSED DURING: 13 growth stages; CONTAINS InterPro DOMAIN/s: AARP2CN (InterPro:IPR012948), Protein of unknown function DUF663 (InterPro:IPR007034); BEST Arabidopsis thaliana protein match is: P-loop containing nucleoside triphosphate hydrolases superfamily protein…	AARP2CN | Ribosome biogenesis protein BMS1/TSR1, C-terminal	NO
AT1G42560	-1.27375	0.7222	0.00229688	0.0188944	DOWN		Seven transmembrane MLO family protein	MILDEW RESISTANCE LOCUS O 9 (MLO9); FUNCTIONS IN: calmodulin binding; INVOLVED IN: cell death, defense response; LOCATED IN: integral to membrane, plasma membrane; EXPRESSED IN: 8 plant structures; EXPRESSED DURING: 4 anthesis, petal differentiation and expansion stage; CONTAINS InterPro DOMAIN/s: Mlo-related protein (InterPro:IPR004326); BEST Arabidopsis thaliana protein match is: Seven transmem…	Mlo-related protein	YES	1:15982936:A-AAT;intronic_variant
AT1G42970	-0.307826	10.7344	0.00124238	0.0115147	DOWN		glyceraldehyde-3-phosphate dehydrogenase B subunit	glyceraldehyde-3-phosphate dehydrogenase B subunit (GAPB); FUNCTIONS IN: glyceraldehyde-3-phosphate dehydrogenase (phosphorylating) activity, glyceraldehyde-3-phosphate dehydrogenase (NADP+) (phosphorylating) activity, glyceraldehyde-3-phosphate dehydrogenase activity; INVOLVED IN: in 6 processes; LOCATED IN: in 7 components; EXPRESSED IN: 25 plant structures; EXPRESSED DURING: 15 growth stages; …	Domain of unknown function CP12 | Glyceraldehyde 3-phosphate dehydrogenase, NAD(P) binding domain | Glyceraldehyde 3-phosphate dehydrogenase, active site | Glyceraldehyde 3-phosphate dehydrogenase, catalytic domain | Glyceraldehyde-3-phosphate dehydrogenase, type I | Glyceraldehyde/Erythrose phosphate dehydrogenase family | NAD(P)-binding domain	NO
AT1G43020	-1.01228	0.108891	0.00314276	0.0242898	DOWN		Protein of unknown function, DUF547	Protein of unknown function, DUF547; FUNCTIONS IN: molecular_function unknown; BEST Arabidopsis thaliana protein match is: Protein of unknown function, DUF547 (TAIR:AT1G21060.2); INVOLVED IN: biological_process unknown; LOCATED IN: cellular_component unknown; EXPRESSED IN: hypocotyl, male gametophyte, root; EXPRESSED DURING: L mature pollen stage; CONTAINS InterPro DOMAIN/s: Protein of unknown fu…	Domain of unknown function DUF547	NO
AT1G43170	0.269547	8.98413	0.00676929	0.0444871	UP		ribosomal protein 1	ribosomal protein 1 (RP1); FUNCTIONS IN: structural constituent of ribosome; INVOLVED IN: translation, embryo development ending in seed dormancy; LOCATED IN: cytosolic ribosome, ribosome, cytosolic large ribosomal subunit; LOCATED IN: cytosolic ribosome, ribosome, cytosolic large ribosomal subunit, plasma membrane, membrane; LOCATED IN: in 7 components; LOCATED IN: in 8 components; EXPRESSED IN:…	Ribosomal protein L3 | Ribosomal protein L3, conserved site | Translation protein, beta-barrel domain	NO
AT1G43675	2.56725	3.88148	4.57126e-57	1.92456e-53	UP		transposable element gene	expressed protein		NO
AT1G43700	0.29689	5.92963	0.00209427	0.017547	UP		VIRE2-interacting protein 1	VIRE2-interacting protein 1 (VIP1); FUNCTIONS IN: protein binding, sequence-specific DNA binding transcription factor activity; INVOLVED IN: cellular response to sulfate starvation, sulfate transport, DNA mediated transformation, nuclear import; LOCATED IN: nucleus; EXPRESSED IN: 23 plant structures; EXPRESSED DURING: 13 growth stages; CONTAINS InterPro DOMAIN/s: Basic-leucine zipper (bZIP) trans…	Basic-leucine zipper domain	NO
AT1G43775	-1.16587	1.98581	5.18602e-06	0.000119392	DOWN		transposable element gene	copia-like retrotransposon family, has a 3.6e-147 P-value blast match to dbj|BAA78426.1| polyprotein (AtRE2-1) (Arabidopsis thaliana) (Ty1_Copia-element)		NO
AT1G43886	-0.488517	2.90324	0.000977697	0.00950024	DOWN		transposable element gene	copia-like retrotransposon family, has a 5.3e-165 P-value blast match to GB:AAA57005 Hopscotch polyprotein (Ty1_Copia-element) (Zea mays)		NO
AT1G44125	-0.547801	2.46142	0.00264683	0.0211451	DOWN					NO
AT1G44350	0.649845	4.39168	0.000205462	0.00262924	UP		IAA-leucine resistant (ILR)-like gene 6	IAA-leucine resistant (ILR)-like gene 6 (ILL6); FUNCTIONS IN: metallopeptidase activity, IAA-amino acid conjugate hydrolase activity; INVOLVED IN: proteolysis, regulation of systemic acquired resistance, auxin metabolic process; LOCATED IN: endomembrane system; EXPRESSED IN: 22 plant structures; EXPRESSED DURING: 13 growth stages; CONTAINS InterPro DOMAIN/s: Peptidase M20 (InterPro:IPR002933), Pe…	Amidohydrolase | Peptidase M20 | Peptidase M20, dimerisation domain	YES	1:16835973:G-A;protein_coding;sense;GGC>GGT;G>G,1:16835973:G-A;exonic_variant
AT1G44575	-0.326482	10.3198	0.000807871	0.00811267	DOWN		Chlorophyll A-B binding family protein	NONPHOTOCHEMICAL QUENCHING 4 (NPQ4); FUNCTIONS IN: chlorophyll binding, xanthophyll binding; INVOLVED IN: response to karrikin, nonphotochemical quenching; LOCATED IN: chloroplast thylakoid membrane, chloroplast, PSII associated light-harvesting complex II, membrane; LOCATED IN: thylakoid, chloroplast thylakoid membrane, chloroplast, PSII associated light-harvesting complex II, membrane; EXPRESSE…	Chlorophyll A-B binding protein | Chlorophyll a/b binding protein domain	NO
AT1G44780	0.407984	2.72763	0.00700945	0.0457352	UP			INVOLVED IN: biological_process unknown; LOCATED IN: cellular_component unknown; EXPRESSED IN: 20 plant structures; EXPRESSED DURING: 9 growth stages; CONTAINS InterPro DOMAIN/s: Histone chaperone domain CHZ (InterPro:IPR019098); BEST Arabidopsis thaliana protein match is: unknown protein (TAIR:AT4G08310.1)	Histone chaperone domain CHZ	NO
AT1G44835	0.29962	4.16417	0.0072914	0.0471819	UP		YbaK/aminoacyl-tRNA synthetase-associated domain	YbaK/aminoacyl-tRNA synthetase-associated domain; CONTAINS InterPro DOMAIN/s: YbaK/aminoacyl-tRNA synthetase-associated domain (InterPro:IPR007214)	YbaK/aminoacyl-tRNA synthetase-associated domain	NO
AT1G44890	0.633602	1.30401	0.00519594	0.0361654	UP			BEST Arabidopsis thaliana protein match is: homolog of yeast oxidase assembly 1 (OXA1) (TAIR:AT5G62050.1)	Membrane insertase OXA1/ALB3/YidC	NO
AT1G44900	0.637403	3.15608	8.85868e-05	0.00131382	UP		minichromosome maintenance (MCM2/3/5) family protein	MINICHROMOSOME MAINTENANCE 2 (MCM2); FUNCTIONS IN: DNA-dependent ATPase activity, DNA binding, ATP binding; INVOLVED IN: in 7 processes; LOCATED IN: nuclear chromatin; EXPRESSED IN: 22 plant structures; EXPRESSED DURING: 12 growth stages; CONTAINS InterPro DOMAIN/s: Nucleic acid-binding, OB-fold-like (InterPro:IPR016027), Nucleic acid-binding, OB-fold (InterPro:IPR012340), DNA-dependent ATPase MC…	DNA replication licensing factor Mcm2 | MCM N-terminal domain | Mini-chromosome maintenance, DNA-dependent ATPase | Mini-chromosome maintenance, conserved site | Nucleic acid-binding, OB-fold | P-loop containing nucleoside triphosphate hydrolase	NO
AT1G44910	0.418346	5.08385	2.83055e-05	0.000507374	UP	YES	pre-mRNA-processing protein 40A	pre-mRNA-processing protein 40A (PRP40A); CONTAINS InterPro DOMAIN/s: FF domain (InterPro:IPR002713), WW/Rsp5/WWP (InterPro:IPR001202); BEST Arabidopsis thaliana protein match is: pre-mRNA-processing protein 40B (TAIR:AT3G19670.1)	FF domain | Pre-mRNA-processing protein PRP40 | WW domain	YES	1:16977617:C-CTT;intronic_variant
AT1G44920	-0.323358	5.67536	0.00101155	0.00976498	DOWN			unknown protein; FUNCTIONS IN: molecular_function unknown; INVOLVED IN: biological_process unknown; LOCATED IN: chloroplast; EXPRESSED IN: 22 plant structures; EXPRESSED DURING: 13 growth stages; CONTAINS InterPro DOMAIN/s: Protein of unknown function DUF3054 (InterPro:IPR021414)	Protein of unknown function DUF3054	NO
AT1G45110	0.815508	2.175	0.00025537	0.00315637	UP		Tetrapyrrole (Corrin/Porphyrin) Methylases	Tetrapyrrole (Corrin/Porphyrin) Methylases; FUNCTIONS IN: methyltransferase activity; INVOLVED IN: metabolic process; EXPRESSED IN: 18 plant structures; EXPRESSED DURING: 11 growth stages; CONTAINS InterPro DOMAIN/s: Uncharacterised protein family UPF0011, conserved site (InterPro:IPR018063), Tetrapyrrole methylase (InterPro:IPR000878), Tetrapyrrole methylase, subdomain 1 (InterPro:IPR014777), Un…	SAM-dependent methyltransferase RsmI, conserved site | Tetrapyrrole methylase | Tetrapyrrole methylase, subdomain 1 | Tetrapyrrole methylase, subdomain 2 | rRNA small subunit methyltransferase I	NO
AT1G45145	-0.51062	4.41116	0.000562668	0.00604707	DOWN		thioredoxin H-type 5	thioredoxin H-type 5 (TRX5); FUNCTIONS IN: oxidoreductase activity, acting on sulfur group of donors, disulfide as acceptor; INVOLVED IN: response to oxidative stress, response to cadmium ion, defense response to fungus, response to microbial phytotoxin; LOCATED IN: cytosol, plasma membrane; EXPRESSED IN: 25 plant structures; EXPRESSED DURING: 15 growth stages; CONTAINS InterPro DOMAIN/s: Thiored…	Thioredoxin | Thioredoxin domain | Thioredoxin, conserved site | Thioredoxin-like fold	NO
AT1G45170	0.359756	3.78965	0.00572094	0.0390371	UP			unknown protein; FUNCTIONS IN: molecular_function unknown; INVOLVED IN: biological_process unknown; LOCATED IN: cellular_component unknown; EXPRESSED IN: 24 plant structures; EXPRESSED DURING: 13 growth stages; BEST Arabidopsis thaliana protein match is: unknown protein (TAIR:AT5G42960.1)		NO
AT1G45191	-1.01844	2.52387	0.000109981	0.00157427	DOWN		Glycosyl hydrolase superfamily protein	Glycosyl hydrolase superfamily protein; beta glucosidase 1 (BGLU1); FUNCTIONS IN: cation binding, hydrolase activity, hydrolyzing O-glycosyl compounds, catalytic activity; INVOLVED IN: carbohydrate metabolic process; LOCATED IN: endomembrane system; CONTAINS InterPro DOMAIN/s: Glycoside hydrolase, family 1 (InterPro:IPR001360), Glycoside hydrolase, family 1, active site (InterPro:IPR018120), Glyc…		NO
AT1G45332	0.644483	4.55626	1.78621e-07	6.68767e-06	UP		Translation elongation factor EFG/EF2 protein	Translation elongation factor EFG/EF2 protein; FUNCTIONS IN: translation factor activity, nucleic acid binding, translation elongation factor activity, ATP binding; INVOLVED IN: translational elongation; LOCATED IN: mitochondrion; CONTAINS InterPro DOMAIN/s: Protein synthesis factor, GTP-binding (InterPro:IPR000795), Translation elongation factor EFG/EF2, domain IV (InterPro:IPR005517), Small GTP…	Elongation factor G, III-V domain | Elongation factor, GTP-binding domain | P-loop containing nucleoside triphosphate hydrolase | Ribosomal protein S5 domain 2-type fold | Ribosomal protein S5 domain 2-type fold, subgroup | Small GTP-binding protein domain | Translation elongation factor EFG, V domain | Translation elongation factor EFG/EF2 | Translation elongation factor EFG/EF2, domain IV | Tra…	NO
AT1G45616	-3.39613	0.915097	5.66365e-27	3.59919e-24	DOWN		receptor like protein 6	receptor like protein 6 (RLP6); INVOLVED IN: signal transduction, defense response; LOCATED IN: membrane; EXPRESSED IN: leaf; CONTAINS InterPro DOMAIN/s: Leucine-rich repeat-containing N-terminal domain, type 2 (InterPro:IPR013210), Leucine-rich repeat (InterPro:IPR001611); BEST Arabidopsis thaliana protein match is: receptor like protein 7 (TAIR:AT1G47890.1)	Leucine-rich repeat | Leucine-rich repeat-containing N-terminal, type 2	NO
AT1G46120	-3.72056	-2.57367	2.3706e-06	6.19238e-05	DOWN		transposable element gene	copia-like retrotransposon family, has a 1.6e-32 P-value blast match to gb|AAO73527.1| gag-pol polyprotein (Glycine max) (SIRE1) (Ty1_Copia-family)		NO
AT1G47210	0.645406	3.59461	0.00157074	0.0139221	UP		cyclin-dependent protein kinase 3;2	cyclin-dependent protein kinase 3;2 (CYCA3;2); CONTAINS InterPro DOMAIN/s: Cyclin, C-terminal (InterPro:IPR004367), Cyclin (InterPro:IPR006670), G2/mitotic-specific cyclin A (InterPro:IPR015453), Cyclin-like (InterPro:IPR011028), Cyclin-related (InterPro:IPR013763), Cyclin, N-terminal (InterPro:IPR006671), Cyclin, A/B/D/E (InterPro:IPR014400); CONTAINS InterPro DOMAIN/s: G2/mitotic-specific cycli…	Cyclin A, plant | Cyclin A/B/D/E/F | Cyclin, C-terminal domain | Cyclin, N-terminal | Cyclin-like	NO
AT1G47250	0.41087	4.47948	0.000255541	0.00315664	UP		20S proteasome alpha subunit F2	20S proteasome alpha subunit F2 (PAF2); FUNCTIONS IN: peptidase activity, endopeptidase activity, threonine-type endopeptidase activity; INVOLVED IN: ubiquitin-dependent protein catabolic process; LOCATED IN: proteasome core complex, proteasome complex, plasma membrane; EXPRESSED IN: 22 plant structures; EXPRESSED DURING: 13 growth stages; CONTAINS InterPro DOMAIN/s: Proteasome, alpha-subunit, co…	Nucleophile aminohydrolases, N-terminal | Proteasome A-type subunit | Proteasome alpha-subunit, N-terminal domain | Proteasome, subunit alpha/beta	NO
AT1G47405	6.39472	-0.0787185	7.82303e-05	0.00118703	UP		transposable element gene	pseudogene, similar to SAE1-S9-protein, similar to putative non-LTR retroelement reverse transcriptase GB:AAC63678 (Arabidopsis thaliana) from (; blastp match of 39% identity and 2.2e-18 P-value to GP|4760708|dbj|BAA77394.1||AB012866 SAE1-S9-protein {Brassica rapa}		NO
AT1G47480	-1.32014	0.941566	3.40284e-09	2.06135e-07	DOWN		alpha/beta-Hydrolases superfamily protein	alpha/beta-Hydrolases superfamily protein; FUNCTIONS IN: hydrolase activity; INVOLVED IN: metabolic process; LOCATED IN: cellular_component unknown; EXPRESSED IN: stem, hypocotyl, root, flower; EXPRESSED DURING: petal differentiation and expansion stage; CONTAINS InterPro DOMAIN/s: Lipase, GDXG, active site (InterPro:IPR002168), Alpha/beta hydrolase fold-3 (InterPro:IPR013094); BEST Arabidopsis t…	Alpha/Beta hydrolase fold | Alpha/beta hydrolase fold-3 | Lipase, GDXG, active site	NO
AT1G47510	-0.8431	2.41732	0.00568344	0.0388419	DOWN		inositol polyphosphate 5-phosphatase 11	inositol polyphosphate 5-phosphatase 11 (5PTASE11); CONTAINS InterPro DOMAIN/s: Inositol polyphosphate related phosphatase (InterPro:IPR000300), Endonuclease/exonuclease/phosphatase (InterPro:IPR005135); FUNCTIONS IN: hydrolase activity, phosphatidylinositol-3,4,5-trisphosphate 5-phosphatase activity, phosphatidylinositol-4,5-bisphosphate 5-phosphatase activity, phosphatidylinositol-3,5-bisphosph…	Endonuclease/exonuclease/phosphatase | Inositol polyphosphate-related phosphatase	NO
AT1G47520	0.417347	3.69148	0.00418207	0.0304356	UP		transposable element gene	copia-like retrotransposon family, has a 3.3e-256 P-value blast match to GB:CAA72989 open reading frame 1 (Ty1_Copia-element) (Brassica oleracea)		NO
AT1G47530	0.311548	7.10399	0.000945044	0.00923129	UP		MATE efflux family protein	MATE efflux family protein; FUNCTIONS IN: antiporter activity, drug transmembrane transporter activity, transporter activity; INVOLVED IN: drug transmembrane transport, ripening, transmembrane transport; LOCATED IN: plasma membrane, membrane; EXPRESSED IN: 23 plant structures; EXPRESSED DURING: 13 growth stages; CONTAINS InterPro DOMAIN/s: Multi antimicrobial extrusion protein MatE (InterPro:IPR0…	Multi antimicrobial extrusion protein	NO
AT1G47840	-1.07387	0.0454063	0.00108746	0.0103582	DOWN		hexokinase 3	hexokinase 3 (HXK3); CONTAINS InterPro DOMAIN/s: Hexokinase, N-terminal (InterPro:IPR022672), Hexokinase, conserved site (InterPro:IPR019807), Hexokinase, C-terminal (InterPro:IPR022673), Hexokinase (InterPro:IPR001312); BEST Arabidopsis thaliana protein match is: hexokinase 1 (TAIR:AT4G29130.1)	Hexokinase | Hexokinase, C-terminal | Hexokinase, N-terminal | Hexokinase, conserved site	NO
AT1G47900	0.363855	4.39596	0.00181504	0.0155978	UP		Plant protein of unknown function (DUF869)	FUNCTIONS IN: molecular_function unknown; Plant protein of unknown function (DUF869); INVOLVED IN: biological_process unknown; EXPRESSED IN: 21 plant structures; EXPRESSED DURING: 13 growth stages; LOCATED IN: plasma membrane; CONTAINS InterPro DOMAIN/s: Prefoldin (InterPro:IPR009053), Protein of unknown function DUF869, plant (InterPro:IPR008587); BEST Arabidopsis thaliana protein match is: Plan…	Filament-like plant protein	NO
AT1G47920	4.40487	-2.69721	1.04853e-06	3.0497e-05	UP		RNI-like superfamily protein	RNI-like superfamily protein; CONTAINS InterPro DOMAIN/s: FBD-like (InterPro:IPR006566), Leucine-rich repeat 2 (InterPro:IPR013101); BEST Arabidopsis thaliana protein match is: F-box/RNI-like/FBD-like domains-containing protein (TAIR:AT1G48400.1)	FBD domain | Leucine-rich repeat 2	NO
AT1G47930	2.22032	-1.90258	2.92376e-05	0.000522137	UP			pseudogene, glutamyl-tRNA synthetase, similar to GI:3435196 from (Arabidopsis thaliana); blastp match of 68% identity and 4.0e-65 P-value to GP|6815089|dbj|BAA90375.1||AP001081 unnamed protein product {Oryza sativa (japonica cultivar-group)}		NO
AT1G47950	1.61203	-0.186922	1.745e-05	0.000336618	UP		transposable element gene	copia-like retrotransposon family, has a 1.5e-238 P-value blast match to dbj|BAA78425.1| polyprotein (Arabidopsis thaliana) (AtRE1) (Ty1_Copia-element)		NO
AT1G48000	-0.643626	2.86566	0.00344247	0.0261729	DOWN		myb domain protein 112	myb domain protein 112 (MYB112); CONTAINS InterPro DOMAIN/s: SANT, DNA-binding (InterPro:IPR001005), Homeodomain-like (InterPro:IPR009057), Myb, DNA-binding (InterPro:IPR014778), HTH transcriptional regulator, Myb-type, DNA-binding (InterPro:IPR017930), Homeodomain-related (InterPro:IPR012287), Myb transcription factor (InterPro:IPR015495); BEST Arabidopsis thaliana protein match is: myb domain p…	Homeodomain-like | Myb domain | SANT/Myb domain	YES	1:17705923:G-GA;intronic_variant
AT1G48030	-0.389796	8.1907	2.44977e-05	0.000445522	DOWN		mitochondrial lipoamide dehydrogenase 1	lipoamide dehydrogenase 1 (LPD1); mitochondrial lipoamide dehydrogenase 1 (mtLPD1); FUNCTIONS IN: dihydrolipoyl dehydrogenase activity, copper ion binding, cobalt ion binding, zinc ion binding, ATP binding; INVOLVED IN: response to cadmium ion, response to light stimulus; LOCATED IN: mitochondrion, apoplast, mitochondrial respiratory chain complex I, mitochondrial matrix; EXPRESSED IN: 28 plant s…	Dihydrolipoamide dehydrogenase | FAD-dependent pyridine nucleotide-disulphide oxidoreductase | FAD/NAD-linked reductase, dimerisation domain | Pyridine nucleotide-disulphide oxidoreductase, FAD/NAD(P)-binding domain | Pyridine nucleotide-disulphide oxidoreductase, NAD-binding domain | Pyridine nucleotide-disulphide oxidoreductase, class I, active site | Pyridine nucleotide-disulphide oxidoreducta…	NO
AT1G48050	0.556916	4.67132	8.20564e-08	3.37866e-06	UP		Ku80 family protein	KU80; FUNCTIONS IN: double-stranded DNA binding, protein binding; INVOLVED IN: in 6 processes; LOCATED IN: nucleus; EXPRESSED IN: 22 plant structures; EXPRESSED DURING: 13 growth stages; CONTAINS InterPro DOMAIN/s: Ku70/Ku80, N-terminal alpha/beta (InterPro:IPR005161), DNA helicase, ATP-dependent, Ku type (InterPro:IPR006164), Spen Paralogue and Orthologue SPOC, C-terminal-like (InterPro:IPR01619…	Ku, C-terminal | Ku70/Ku80 C-terminal arm | Ku70/Ku80 beta-barrel domain | Ku70/Ku80, N-terminal alpha/beta | Ku80 | SPOC like C-terminal domain | von Willebrand factor, type A	NO
AT1G48130	-1.91395	1.00039	3.9914e-07	1.343e-05	DOWN		1-cysteine peroxiredoxin 1	1-cysteine peroxiredoxin 1 (PER1); FUNCTIONS IN: thioredoxin peroxidase activity, antioxidant activity; INVOLVED IN: maintenance of seed dormancy, response to desiccation; LOCATED IN: cellular_component unknown; EXPRESSED IN: embryo, aleurone layer, seed; EXPRESSED DURING: seed development stages; CONTAINS InterPro DOMAIN/s: Peroxiredoxin, C-terminal (InterPro:IPR019479), Thioredoxin fold (InterP…	Alkyl hydroperoxide reductase subunit C/ Thiol specific antioxidant | Peroxiredoxin, AhpC-type | Peroxiredoxin, C-terminal | Thioredoxin-like fold	NO
AT1G48160	0.33996	4.36592	0.00135489	0.0123502	UP		signal recognition particle 19 kDa protein, putative / SRP19, putative	signal recognition particle 19 kDa protein, putative / SRP19, putative; FUNCTIONS IN: 7S RNA binding; INVOLVED IN: protein targeting, SRP-dependent cotranslational protein targeting to membrane; LOCATED IN: signal recognition particle, signal recognition particle, endoplasmic reticulum targeting; EXPRESSED IN: 24 plant structures; EXPRESSED DURING: 15 growth stages; CONTAINS InterPro DOMAIN/s: Si…	Signal recognition particle, SRP19 subunit	NO
AT1G48260	-1.20686	1.82771	9.15713e-07	2.72217e-05	DOWN		CBL-interacting protein kinase 17	CBL-interacting protein kinase 17 (CIPK17); FUNCTIONS IN: protein serine/threonine kinase activity, protein kinase activity, kinase activity, ATP binding; INVOLVED IN: signal transduction, protein amino acid phosphorylation; LOCATED IN: cellular_component unknown; EXPRESSED IN: 9 plant structures; EXPRESSED DURING: LP.04 four leaves visible, 4 anthesis; CONTAINS InterPro DOMAIN/s: Protein kinase,…	NAF domain | NAF/FISL domain | Protein kinase domain | Protein kinase, ATP binding site | Protein kinase-like domain | Serine/threonine-protein kinase, active site | Serine/threonine/dual specificity protein kinase, catalytic domain	NO
AT1G48390	0.71904	1.1787	0.00186369	0.0159519	UP		RNI-like superfamily protein	RNI-like superfamily protein; CONTAINS InterPro DOMAIN/s: FBD-like (InterPro:IPR006566); BEST Arabidopsis thaliana protein match is: F-box/RNI-like/FBD-like domains-containing protein (TAIR:AT1G48400.1)	FBD domain	NO
AT1G48570	0.951648	3.51108	5.4186e-10	3.85029e-08	UP		zinc finger (Ran-binding) family protein	zinc finger (Ran-binding) family protein; FUNCTIONS IN: binding, zinc ion binding; LOCATED IN: intracellular, chloroplast; EXPRESSED IN: 22 plant structures; EXPRESSED DURING: 13 growth stages; CONTAINS InterPro DOMAIN/s: Zinc finger, RanBP2-type (InterPro:IPR001876); BEST Arabidopsis thaliana protein match is: Ran BP2/NZF zinc finger-like superfamily protein (TAIR:AT1G70650.2)	Zinc finger, RanBP2-type	NO
AT1G48630	0.61605	5.09142	3.41363e-07	1.16963e-05	UP	YES	receptor for activated C kinase 1B	receptor for activated C kinase 1B (RACK1B_AT); FUNCTIONS IN: nucleotide binding; INVOLVED IN: shoot development, root development; LOCATED IN: cytosolic ribosome; EXPRESSED IN: 23 plant structures; EXPRESSED DURING: 14 growth stages; CONTAINS InterPro DOMAIN/s: WD40 repeat 2 (InterPro:IPR019782), WD40 repeat, conserved site (InterPro:IPR019775), WD40 repeat (InterPro:IPR001680), G-protein beta W…	G-protein beta WD-40 repeat | WD40 repeat | WD40 repeat, conserved site | WD40-repeat-containing domain | WD40/YVTN repeat-like-containing domain	NO
AT1G48745	-0.854895	2.01024	6.24623e-06	0.000140159	DOWN			unknown protein		NO
AT1G48830	0.404978	6.5166	7.32284e-06	0.00016053	UP		Ribosomal protein S7e family protein	Ribosomal protein S7e family protein; FUNCTIONS IN: structural constituent of ribosome; INVOLVED IN: translation; LOCATED IN: cytosolic small ribosomal subunit, cytosolic ribosome, cell wall, plasma membrane, chloroplast; EXPRESSED IN: 23 plant structures; EXPRESSED DURING: 13 growth stages; CONTAINS InterPro DOMAIN/s: Ribosomal protein S7e (InterPro:IPR000554); BEST Arabidopsis thaliana protein …	Ribosomal protein S7e	NO
AT1G48850	0.306968	6.04589	0.00152127	0.0135802	UP		chorismate synthase, putative / 5-enolpyruvylshikimate-3-phosphate phospholyase, putative	embryo defective 1144 (EMB1144); FUNCTIONS IN: chorismate synthase activity; INVOLVED IN: aromatic amino acid family biosynthetic process, embryo development ending in seed dormancy; LOCATED IN: nucleolus, chloroplast; EXPRESSED IN: 25 plant structures; EXPRESSED DURING: 15 growth stages; CONTAINS InterPro DOMAIN/s: Chorismate synthase, conserved site (InterPro:IPR020541), Chorismate synthase (In…	Chorismate synthase | Chorismate synthase, conserved site	NO
AT1G48920	0.628558	7.41941	2.85779e-09	1.75966e-07	UP		nucleolin like 1	nucleolin like 1 (NUC-L1); FUNCTIONS IN: nucleotide binding, nucleic acid binding; INVOLVED IN: in 12 processes; LOCATED IN: nucleolus; EXPRESSED IN: 33 plant structures; EXPRESSED DURING: 13 growth stages; CONTAINS InterPro DOMAIN/s: RNA recognition motif, RNP-1 (InterPro:IPR000504), Nucleotide-binding, alpha-beta plait (InterPro:IPR012677); BEST Arabidopsis thaliana protein match is: nucleolin …	Nucleotide-binding, alpha-beta plait | RNA recognition motif domain	NO
AT1G48930	-0.959736	2.58943	0.000474872	0.00525088	DOWN		glycosyl hydrolase 9C1	glycosyl hydrolase 9C1 (GH9C1); FUNCTIONS IN: carbohydrate binding, hydrolase activity, hydrolyzing O-glycosyl compounds, catalytic activity; INVOLVED IN: carbohydrate metabolic process; LOCATED IN: endomembrane system, extracellular region; EXPRESSED IN: root; CONTAINS InterPro DOMAIN/s: Six-hairpin glycosidase (InterPro:IPR012341), Glycoside hydrolase, family 9, active site (InterPro:IPR018221)…	Carbohydrate binding domain CBM49 | Glycoside hydrolase, family 9 | Glycoside hydrolase, family 9, active site | Six-hairpin glycosidase | Six-hairpin glycosidase-like	NO
AT1G48970	0.348653	4.31074	0.00467459	0.0332584	UP		NagB/RpiA/CoA transferase-like superfamily protein	NagB/RpiA/CoA transferase-like superfamily protein; FUNCTIONS IN: GTP binding, translation initiation factor activity; INVOLVED IN: translational initiation, cellular metabolic process; LOCATED IN: eukaryotic translation initiation factor 2B complex; EXPRESSED IN: 23 plant structures; EXPRESSED DURING: 13 growth stages; CONTAINS InterPro DOMAIN/s: Initiation factor 2B related (InterPro:IPR000649)…	Initiation factor 2B-related	NO
AT1G49130	0.445364	3.65441	0.00483498	0.0340809	UP		B-box type zinc finger protein with CCT domain	B-box type zinc finger protein with CCT domain; FUNCTIONS IN: sequence-specific DNA binding transcription factor activity, zinc ion binding; INVOLVED IN: regulation of transcription; LOCATED IN: intracellular; CONTAINS InterPro DOMAIN/s: CCT domain (InterPro:IPR010402), Zinc finger, B-box (InterPro:IPR000315); BEST Arabidopsis thaliana protein match is: B-box type zinc finger protein with CCT dom…	CCT domain | Zinc finger, B-box	NO
AT1G49180	0.841775	4.77296	2.89249e-14	4.77559e-12	UP		protein kinase family protein	protein kinase family protein; FUNCTIONS IN: protein serine/threonine kinase activity, protein kinase activity, kinase activity, ATP binding, nucleic acid binding; FUNCTIONS IN: protein serine/threonine kinase activity, protein kinase activity, kinase activity, nucleic acid binding, ATP binding; INVOLVED IN: protein amino acid phosphorylation; LOCATED IN: cellular_component unknown; EXPRESSED IN:…	Protein kinase domain | Protein kinase-like domain | Ribonuclease H-like domain | Serine/threonine-protein kinase, active site | Serine/threonine/dual specificity protein kinase, catalytic domain	NO
AT1G49210	0.819375	1.20926	0.000174356	0.00229753	UP		RING/U-box superfamily protein	RING/U-box superfamily protein; FUNCTIONS IN: zinc ion binding; EXPRESSED IN: 9 plant structures; EXPRESSED DURING: LP.06 six leaves visible, 4 anthesis, LP.10 ten leaves visible, petal differentiation and expansion stage; CONTAINS InterPro DOMAIN/s: Zinc finger, RING-type (InterPro:IPR001841), Zinc finger, C3HC4 RING-type (InterPro:IPR018957); BEST Arabidopsis thaliana protein match is: RING/U-b…	Zinc finger, RING-type | Zinc finger, RING/FYVE/PHD-type	NO
AT1G49245	-1.49713	1.54139	1.28431e-13	1.87259e-11	DOWN		Prefoldin chaperone subunit family protein	Prefoldin chaperone subunit family protein; FUNCTIONS IN: unfolded protein binding; INVOLVED IN: protein folding; LOCATED IN: prefoldin complex; EXPRESSED IN: 22 plant structures; EXPRESSED DURING: 13 growth stages; CONTAINS InterPro DOMAIN/s: Prefoldin beta-like (InterPro:IPR002777), Prefoldin (InterPro:IPR009053)	Prefoldin | Prefoldin beta-like	NO
AT1G49380	-0.324591	5.82269	0.000817943	0.00819733	DOWN		cytochrome c biogenesis protein family	cytochrome c biogenesis protein family; FUNCTIONS IN: molecular_function unknown; INVOLVED IN: cytochrome complex assembly; LOCATED IN: chloroplast; EXPRESSED IN: 22 plant structures; EXPRESSED DURING: 13 growth stages; CONTAINS InterPro DOMAIN/s: ResB-like (InterPro:IPR007816)	Cytochrome c biogenesis protein Ccs1/CcsB | ResB-like domain	NO
AT1G49410	0.3918	4.12098	0.0021361	0.0178442	UP		translocase of the outer mitochondrial membrane 6	translocase of the outer mitochondrial membrane 6 (TOM6)		NO
AT1G49470	-0.778192	3.24284	1.67694e-05	0.000325351	DOWN		Family of unknown function (DUF716)	Family of unknown function (DUF716) ; FUNCTIONS IN: molecular_function unknown; INVOLVED IN: biological_process unknown; LOCATED IN: endomembrane system; EXPRESSED IN: 20 plant structures; EXPRESSED DURING: 10 growth stages; CONTAINS InterPro DOMAIN/s: Protein of unknown function DUF716 (InterPro:IPR006904); BEST Arabidopsis thaliana protein match is: Family of unknown function (DUF716) (TAIR:AT1…	Protein of unknown function DUF716 (TMEM45)	NO
AT1G49500	0.298055	7.75507	0.00718383	0.0466741	UP			unknown protein; FUNCTIONS IN: molecular_function unknown; INVOLVED IN: biological_process unknown; LOCATED IN: endomembrane system; EXPRESSED IN: 19 plant structures; EXPRESSED DURING: 10 growth stages; BEST Arabidopsis thaliana protein match is: unknown protein (TAIR:AT3G19030.1)		NO
AT1G49530	-2.20267	0.735774	1.85912e-13	2.64207e-11	DOWN		geranylgeranyl pyrophosphate synthase 6	geranylgeranyl pyrophosphate synthase 6 (GGPS6); CONTAINS InterPro DOMAIN/s: Polyprenyl synthetase-related (InterPro:IPR017446), Terpenoid synthase (InterPro:IPR008949), Polyprenyl synthetase (InterPro:IPR000092); BEST Arabidopsis thaliana protein match is: Terpenoid synthases superfamily protein (TAIR:AT3G20160.1)	Polyprenyl synthetase | Polyprenyl synthetase-related | Terpenoid synthase	NO
AT1G49540	0.550959	3.53953	9.88359e-05	0.00143986	UP		elongator protein 2	elongator protein 2 (ELP2); FUNCTIONS IN: nucleotide binding; INVOLVED IN: biological_process unknown; LOCATED IN: cellular_component unknown; EXPRESSED IN: 6 plant structures; EXPRESSED DURING: 4 anthesis, petal differentiation and expansion stage, E expanded cotyledon stage; CONTAINS InterPro DOMAIN/s: WD40 repeat 2 (InterPro:IPR019782), WD40 repeat, conserved site (InterPro:IPR019775), WD40 re…	G-protein beta WD-40 repeat | WD40 repeat | WD40 repeat, conserved site | WD40-repeat-containing domain | WD40/YVTN repeat-like-containing domain	NO
AT1G49600	0.528567	5.9412	4.08257e-06	9.71768e-05	UP		RNA-binding protein 47A	RNA-binding protein 47A (RBP47A); FUNCTIONS IN: RNA binding; EXPRESSED IN: 24 plant structures; EXPRESSED DURING: 14 growth stages; CONTAINS InterPro DOMAIN/s: RNA recognition motif, RNP-1 (InterPro:IPR000504), Nucleotide-binding, alpha-beta plait (InterPro:IPR012677); BEST Arabidopsis thaliana protein match is: RNA-binding protein 47B (TAIR:AT3G19130.1)	Nucleotide-binding, alpha-beta plait | RNA recognition motif domain	NO
AT1G49650	0.579333	3.89512	3.99205e-05	0.000681057	UP		alpha/beta-Hydrolases superfamily protein	alpha/beta-Hydrolases superfamily protein; FUNCTIONS IN: hydrolase activity; INVOLVED IN: metabolic process; EXPRESSED IN: 15 plant structures; EXPRESSED DURING: 10 growth stages; CONTAINS InterPro DOMAIN/s: Alpha/beta hydrolase fold-3 (InterPro:IPR013094); BEST Arabidopsis thaliana protein match is: carboxyesterase 5 (TAIR:AT1G49660.1)	Alpha/Beta hydrolase fold | Alpha/beta hydrolase fold-3	NO
AT1G49730	0.474537	5.08786	1.48579e-06	4.14606e-05	UP		Protein kinase superfamily protein	Protein kinase superfamily protein; FUNCTIONS IN: kinase activity; INVOLVED IN: protein amino acid phosphorylation; LOCATED IN: plasma membrane; EXPRESSED IN: 20 plant structures; EXPRESSED DURING: 13 growth stages; CONTAINS InterPro DOMAIN/s: Protein kinase, ATP binding site (InterPro:IPR017441), Protein kinase, catalytic domain (InterPro:IPR000719), Serine-threonine/tyrosine-protein kinase (Int…	Concanavalin A-like lectin/glucanase, subgroup | Protein kinase domain | Protein kinase, ATP binding site | Protein kinase-like domain | Serine/threonine-protein kinase, active site	NO
AT1G49740	-0.419572	4.11577	0.00487111	0.0343087	DOWN		PLC-like phosphodiesterases superfamily protein	PLC-like phosphodiesterases superfamily protein; FUNCTIONS IN: phospholipase C activity, phosphoric diester hydrolase activity; INVOLVED IN: intracellular signaling pathway, lipid metabolic process; LOCATED IN: endomembrane system; EXPRESSED IN: 22 plant structures; EXPRESSED DURING: 13 growth stages; CONTAINS InterPro DOMAIN/s: Phospholipase C, phosphatidylinositol-specific , X domain (InterPro:…	PLC-like phosphodiesterase, TIM beta/alpha-barrel domain | Phospholipase C, phosphatidylinositol-specific , X domain	NO
AT1G49750	-0.655894	5.48059	1.82165e-08	8.98241e-07	DOWN		Leucine-rich repeat (LRR) family protein	Leucine-rich repeat (LRR) family protein; LOCATED IN: chloroplast; EXPRESSED IN: 22 plant structures; EXPRESSED DURING: 13 growth stages; CONTAINS InterPro DOMAIN/s: Leucine-rich repeat (InterPro:IPR001611); BEST Arabidopsis thaliana protein match is: Leucine-rich repeat (LRR) family protein (TAIR:AT3G19320.1)	Leucine-rich repeat	NO
AT1G49760	0.470116	6.40781	4.52525e-05	0.000754903	UP	YES	poly(A) binding protein 8	poly(A) binding protein 8 (PAB8); CONTAINS InterPro DOMAIN/s: Polyadenylate-binding protein/Hyperplastic disc protein (InterPro:IPR002004), RNA recognition motif, RNP-1 (InterPro:IPR000504), Polyadenylate binding protein, human types 1, 2, 3, 4 (InterPro:IPR006515), Nucleotide-binding, alpha-beta plait (InterPro:IPR012677); FUNCTIONS IN: RNA binding, translation initiation factor activity; BEST A…	Nucleotide-binding, alpha-beta plait | Polyadenylate binding protein, human types 1, 2, 3, 4 | Polyadenylate-binding protein/Hyperplastic disc protein | RNA recognition motif domain	NO
AT1G49920	1.76063	-2.21639	0.0038701	0.028686	UP		MuDR family transposase	MuDR family transposase; FUNCTIONS IN: zinc ion binding; INVOLVED IN: biological_process unknown; LOCATED IN: cellular_component unknown; EXPRESSED IN: flower; EXPRESSED DURING: petal differentiation and expansion stage; CONTAINS InterPro DOMAIN/s: MULE transposase, conserved domain (InterPro:IPR018289), Zinc finger, PMZ-type (InterPro:IPR006564), Zinc finger, SWIM-type (InterPro:IPR007527), Tran…	Armadillo-type fold | MULE transposase domain | Transposase, MuDR, plant | Zinc finger, PMZ-type | Zinc finger, SWIM-type	NO
AT1G50010	0.552521	7.68315	5.73514e-05	0.000921069	UP		tubulin alpha-2 chain	tubulin alpha-2 chain (TUA2); FUNCTIONS IN: structural constituent of cytoskeleton; INVOLVED IN: microtubule-based process, response to salt stress; LOCATED IN: tubulin complex, cytosol, cell wall, membrane; EXPRESSED IN: 26 plant structures; EXPRESSED DURING: 15 growth stages; CONTAINS InterPro DOMAIN/s: Alpha tubulin (InterPro:IPR002452), Tubulin (InterPro:IPR000217), Tubulin/FtsZ, GTPase domai…	Alpha tubulin | Tubulin | Tubulin, C-terminal | Tubulin, conserved site | Tubulin/FtsZ, 2-layer sandwich domain | Tubulin/FtsZ, C-terminal | Tubulin/FtsZ, GTPase domain	NO
AT1G50020	-0.544811	6.91966	7.46321e-06	0.000163015	DOWN			unknown protein; FUNCTIONS IN: molecular_function unknown; INVOLVED IN: biological_process unknown; LOCATED IN: chloroplast thylakoid membrane, chloroplast; EXPRESSED IN: 24 plant structures; EXPRESSED DURING: 15 growth stages		NO
AT1G50055	-3.01537	1.15375	2.08381e-33	2.26403e-30	DOWN		TAS1B; other RNA			NO
AT1G50170	-0.436861	4.21909	0.000207391	0.00264789	DOWN		sirohydrochlorin ferrochelatase B	sirohydrochlorin ferrochelatase B (SIRB); FUNCTIONS IN: sirohydrochlorin ferrochelatase activity; INVOLVED IN: response to oxidative stress, siroheme biosynthetic process; LOCATED IN: chloroplast; EXPRESSED IN: 24 plant structures; EXPRESSED DURING: 15 growth stages; CONTAINS InterPro DOMAIN/s: Cobalamin (vitamin B12) biosynthesis CbiX (InterPro:IPR002762)	Cobalamin (vitamin B12) biosynthesis CbiX	NO
AT1G50190	2.66722	-1.0277	5.15712e-06	0.000118937	UP		Cysteine/Histidine-rich C1 domain family protein	Cysteine/Histidine-rich C1 domain family protein; FUNCTIONS IN: molecular_function unknown; INVOLVED IN: intracellular signaling pathway; LOCATED IN: cellular_component unknown; CONTAINS InterPro DOMAIN/s: Protein kinase C-like, phorbol ester/diacylglycerol binding (InterPro:IPR002219), DC1 (InterPro:IPR004146), C1-like (InterPro:IPR011424); BEST Arabidopsis thaliana protein match is: Cysteine/Hi…	C1-like | DC1 | Protein kinase C-like, phorbol ester/diacylglycerol-binding domain | Zinc finger, PHD-type	NO
AT1G50240	0.700255	2.95203	8.48063e-05	0.001265	UP		Protein kinase family protein with ARM repeat domain	FUSED (FU); CONTAINS InterPro DOMAIN/s: Protein kinase, ATP binding site (InterPro:IPR017441), Serine/threonine-protein kinase domain (InterPro:IPR002290), Armadillo-like helical (InterPro:IPR011989), Armadillo (InterPro:IPR000225), 26S proteasome non-ATPase regulatory subunit 5 (InterPro:IPR019538), Serine/threonine-protein kinase-like domain (InterPro:IPR017442), Protein kinase-like domain (Int…	Armadillo | Armadillo-like helical | Armadillo-type fold | Protein kinase domain | Protein kinase, ATP binding site | Protein kinase-like domain | Serine/threonine-protein kinase, active site | Serine/threonine/dual specificity protein kinase, catalytic domain	NO
AT1G50250	-1.41103	7.63555	1.80203e-27	1.26447e-24	DOWN		FTSH protease 1	FTSH protease 1 (FTSH1); FUNCTIONS IN: metallopeptidase activity, protein binding, ATP-dependent peptidase activity, ATPase activity; INVOLVED IN: photosystem II repair, PSII associated light-harvesting complex II catabolic process; LOCATED IN: thylakoid lumen, chloroplast thylakoid membrane, chloroplast, membrane; EXPRESSED IN: 24 plant structures; EXPRESSED DURING: 13 growth stages; CONTAINS In…	AAA+ ATPase domain | ATPase, AAA-type, conserved site | ATPase, AAA-type, core | P-loop containing nucleoside triphosphate hydrolase | Peptidase M41 | Peptidase, FtsH	YES	1:18615421:G-A;exonic_variant,1:18615421:G-A;protein_coding;stop-gain;CAA>TAA;Q>*
AT1G50300	0.404797	4.31455	0.000975527	0.0094852	UP		TBP-associated factor 15	TBP-associated factor 15 (TAF15); FUNCTIONS IN: RNA binding, nucleotide binding, zinc ion binding, nucleic acid binding; INVOLVED IN: biological_process unknown; LOCATED IN: intracellular; EXPRESSED IN: 22 plant structures; EXPRESSED DURING: 9 growth stages; CONTAINS InterPro DOMAIN/s: RNA recognition motif, RNP-1 (InterPro:IPR000504), Nucleotide-binding, alpha-beta plait (InterPro:IPR012677), Zi…	Nucleotide-binding, alpha-beta plait | RNA recognition motif domain | Zinc finger, RanBP2-type	NO
AT1G50450	0.31625	6.15552	0.00138721	0.0126005	UP		Saccharopine dehydrogenase	Saccharopine dehydrogenase ; FUNCTIONS IN: binding, catalytic activity; INVOLVED IN: metabolic process; LOCATED IN: chloroplast; EXPRESSED IN: 21 plant structures; EXPRESSED DURING: 13 growth stages; CONTAINS InterPro DOMAIN/s: Saccharopine dehydrogenase / Homospermidine synthase (InterPro:IPR005097), NAD(P)-binding domain (InterPro:IPR016040)	NAD(P)-binding domain | Saccharopine dehydrogenase / Homospermidine synthase	NO
AT1G50490	0.65687	3.74509	7.5245e-06	0.000164247	UP		ubiquitin-conjugating enzyme 20	ubiquitin-conjugating enzyme 20 (UBC20); CONTAINS InterPro DOMAIN/s: Ubiquitin-conjugating enzyme/RWD-like (InterPro:IPR016135), Ubiquitin-conjugating enzyme E2 H10 (InterPro:IPR015582), Ubiquitin-conjugating enzyme, E2 (InterPro:IPR000608); BEST Arabidopsis thaliana protein match is: ubiquitin-conjugating enzyme19 (TAIR:AT3G20060.1)	Ubiquitin-conjugating enzyme, E2 | Ubiquitin-conjugating enzyme, active site | Ubiquitin-conjugating enzyme/RWD-like	NO
AT1G50500	0.33498	5.42344	0.000642981	0.0067339	UP		Membrane trafficking VPS53 family protein	HEAT-INTOLERANT 1 (HIT1); CONTAINS InterPro DOMAIN/s: Vps53-like, N-terminal (InterPro:IPR007234); BEST Arabidopsis thaliana protein match is: Membrane trafficking VPS53 family protein (TAIR:AT1G50970.1)	Vps53-like, N-terminal	YES	1:18709031:G-GC;splice_donor_region_variant
AT1G50620	0.462903	4.44548	0.000174978	0.00230393	UP		RING/FYVE/PHD zinc finger superfamily protein	RING/FYVE/PHD zinc finger superfamily protein; FUNCTIONS IN: DNA binding, zinc ion binding; INVOLVED IN: regulation of transcription, DNA-dependent; EXPRESSED IN: 22 plant structures; EXPRESSED DURING: 13 growth stages; CONTAINS InterPro DOMAIN/s: Zinc finger, PHD-type, conserved site (InterPro:IPR019786), Zinc finger, PHD-type (InterPro:IPR001965), Zinc finger, FYVE/PHD-type (InterPro:IPR011011)…	Zinc finger, FYVE/PHD-type | Zinc finger, PHD-finger | Zinc finger, PHD-type | Zinc finger, PHD-type, conserved site | Zinc finger, RING/FYVE/PHD-type	NO
AT1G50790	1.56461	1.80468	6.39549e-18	1.69611e-15	UP		Plant mobile domain protein family	Plant mobile domain protein family; FUNCTIONS IN: molecular_function unknown; INVOLVED IN: biological_process unknown; LOCATED IN: chloroplast; CONTAINS InterPro DOMAIN/s: Aminotransferase-like, plant mobile domain (InterPro:IPR019557); BEST Arabidopsis thaliana protein match is: Aminotransferase-like, plant mobile domain family protein (TAIR:AT1G50820.1)	Aminotransferase-like, plant mobile domain | Protein of unknown function DUF716 (TMEM45)	NO
AT1G50900	-0.300372	6.54648	0.000801532	0.00806159	DOWN		Ankyrin repeat family protein	Ankyrin repeat family protein; FUNCTIONS IN: molecular_function unknown; INVOLVED IN: response to karrikin; LOCATED IN: chloroplast, chloroplast stroma; EXPRESSED IN: 22 plant structures; EXPRESSED DURING: 13 growth stages; CONTAINS InterPro DOMAIN/s: Ankyrin repeat-containing domain (InterPro:IPR020683), Ankyrin repeat (InterPro:IPR002110)	Ankyrin repeat | Ankyrin repeat-containing domain	NO
AT1G50920	0.437801	6.4777	2.95807e-05	0.000527148	UP		Nucleolar GTP-binding protein	Nucleolar GTP-binding protein; FUNCTIONS IN: GTP binding, nucleotide binding; LOCATED IN: membrane; EXPRESSED IN: 22 plant structures; EXPRESSED DURING: 13 growth stages; CONTAINS InterPro DOMAIN/s: GTP1/OBG (InterPro:IPR006073), Nucleolar GTP-binding 1 (InterPro:IPR010674), NOG, C-terminal (InterPro:IPR012973); BEST Arabidopsis thaliana protein match is: Nucleolar GTP-binding protein (TAIR:AT1G1…	GTP binding domain | NOG, C-terminal | Nucleolar GTP-binding protein 1 | Nucleolar GTP-binding protein 1, Rossman-fold domain | P-loop containing nucleoside triphosphate hydrolase	NO
AT1G51110	-1.10675	6.84049	1.58811e-31	1.48581e-28	DOWN		Plastid-lipid associated protein PAP / fibrillin family protein	Plastid-lipid associated protein PAP / fibrillin family protein; FUNCTIONS IN: structural molecule activity; INVOLVED IN: tryptophan biosynthetic process; LOCATED IN: chloroplast thylakoid membrane, chloroplast, membrane; EXPRESSED IN: 21 plant structures; EXPRESSED DURING: 13 growth stages; CONTAINS InterPro DOMAIN/s: Plastid lipid-associated protein/fibrillin (InterPro:IPR006843); BEST Arabidop…	Plastid lipid-associated protein/fibrillin conserved domain	NO
AT1G51170	0.516229	2.64118	0.00652475	0.0433478	UP		Protein kinase superfamily protein	Protein kinase superfamily protein; FUNCTIONS IN: kinase activity; INVOLVED IN: protein amino acid phosphorylation; EXPRESSED IN: 21 plant structures; EXPRESSED DURING: 7 growth stages; CONTAINS InterPro DOMAIN/s: Protein kinase, ATP binding site (InterPro:IPR017441), Protein kinase, catalytic domain (InterPro:IPR000719), Serine/threonine-protein kinase domain (InterPro:IPR002290), Serine/threoni…	Protein kinase domain | Protein kinase, ATP binding site | Protein kinase-like domain | Serine/threonine-protein kinase, active site | Serine/threonine/dual specificity protein kinase, catalytic domain	NO
[truncated: 4,466 more rows]

## Sheet: a_Koncz Share
Gene ID	Category	Protein annotation
AT1G02140	EJC/mRNP	HAP1; HAPLESS 1;MATERNAL EFFECT EMBRYO ARREST 63; MEE63
[truncated: 100 more rows]

## Sheet: GO_a_up_C
Term Name	GOID	Term Type	Depth	cnt(reference)	cnt(a_up1)	fsh(a_up1)
[truncated: 137 more rows]

[truncated: 21 more sheets: GO_a_up_F, GO_a_up_P, GO_a_down_C, GO_a_down_F, GO_a_down_P, smfb, b_Koncz Share, GO_b_up_C, GO_b_up_F, GO_b_up_P, GO_b_down_C, GO_b_down_F, GO_b_down_P, share_a_b, a_b_Koncz_Share, GO_a_b_up_C, GO_a_b_up_F, GO_a_b_up_P, GO_a_b_down_C, GO_a_b_down_F …]
